# Supplementary material for: De Novo Genome Assembly of Chinese Plateau Honeybee Unravels Intraspecies Genetic Diversity in the Eastern Honeybee, Apis cerana
Source: MDPI journal article supplement (doi:10.3390/insects12100891), 2021-10-01
Supplement: s1 [file s1]

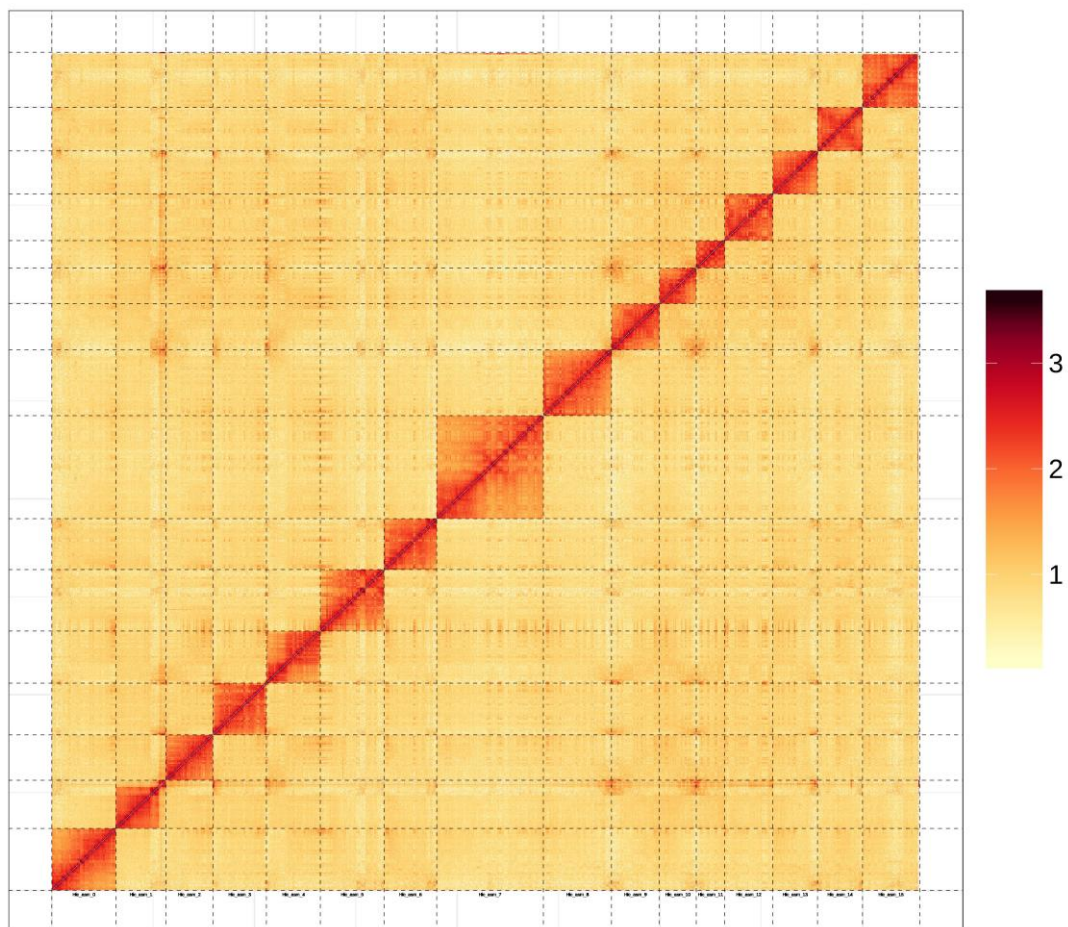

**Figure S1.** Heat map of Hi-C contact information of the 16 chromosomes, pixel colors represent different normalized counts of Hi-C links between 100kb non-overlapping windows for all 16 chromosomes (chr) on a logarithmic scale.
