# Supplementary material for: De Novo Genome Assembly of Chinese Plateau Honeybee Unravels Intraspecies Genetic Diversity in the Eastern Honeybee, Apis cerana
Source: MDPI journal article supplement (doi:10.3390/insects12100891), 2021-10-01
Supplement: s1 [file s1]

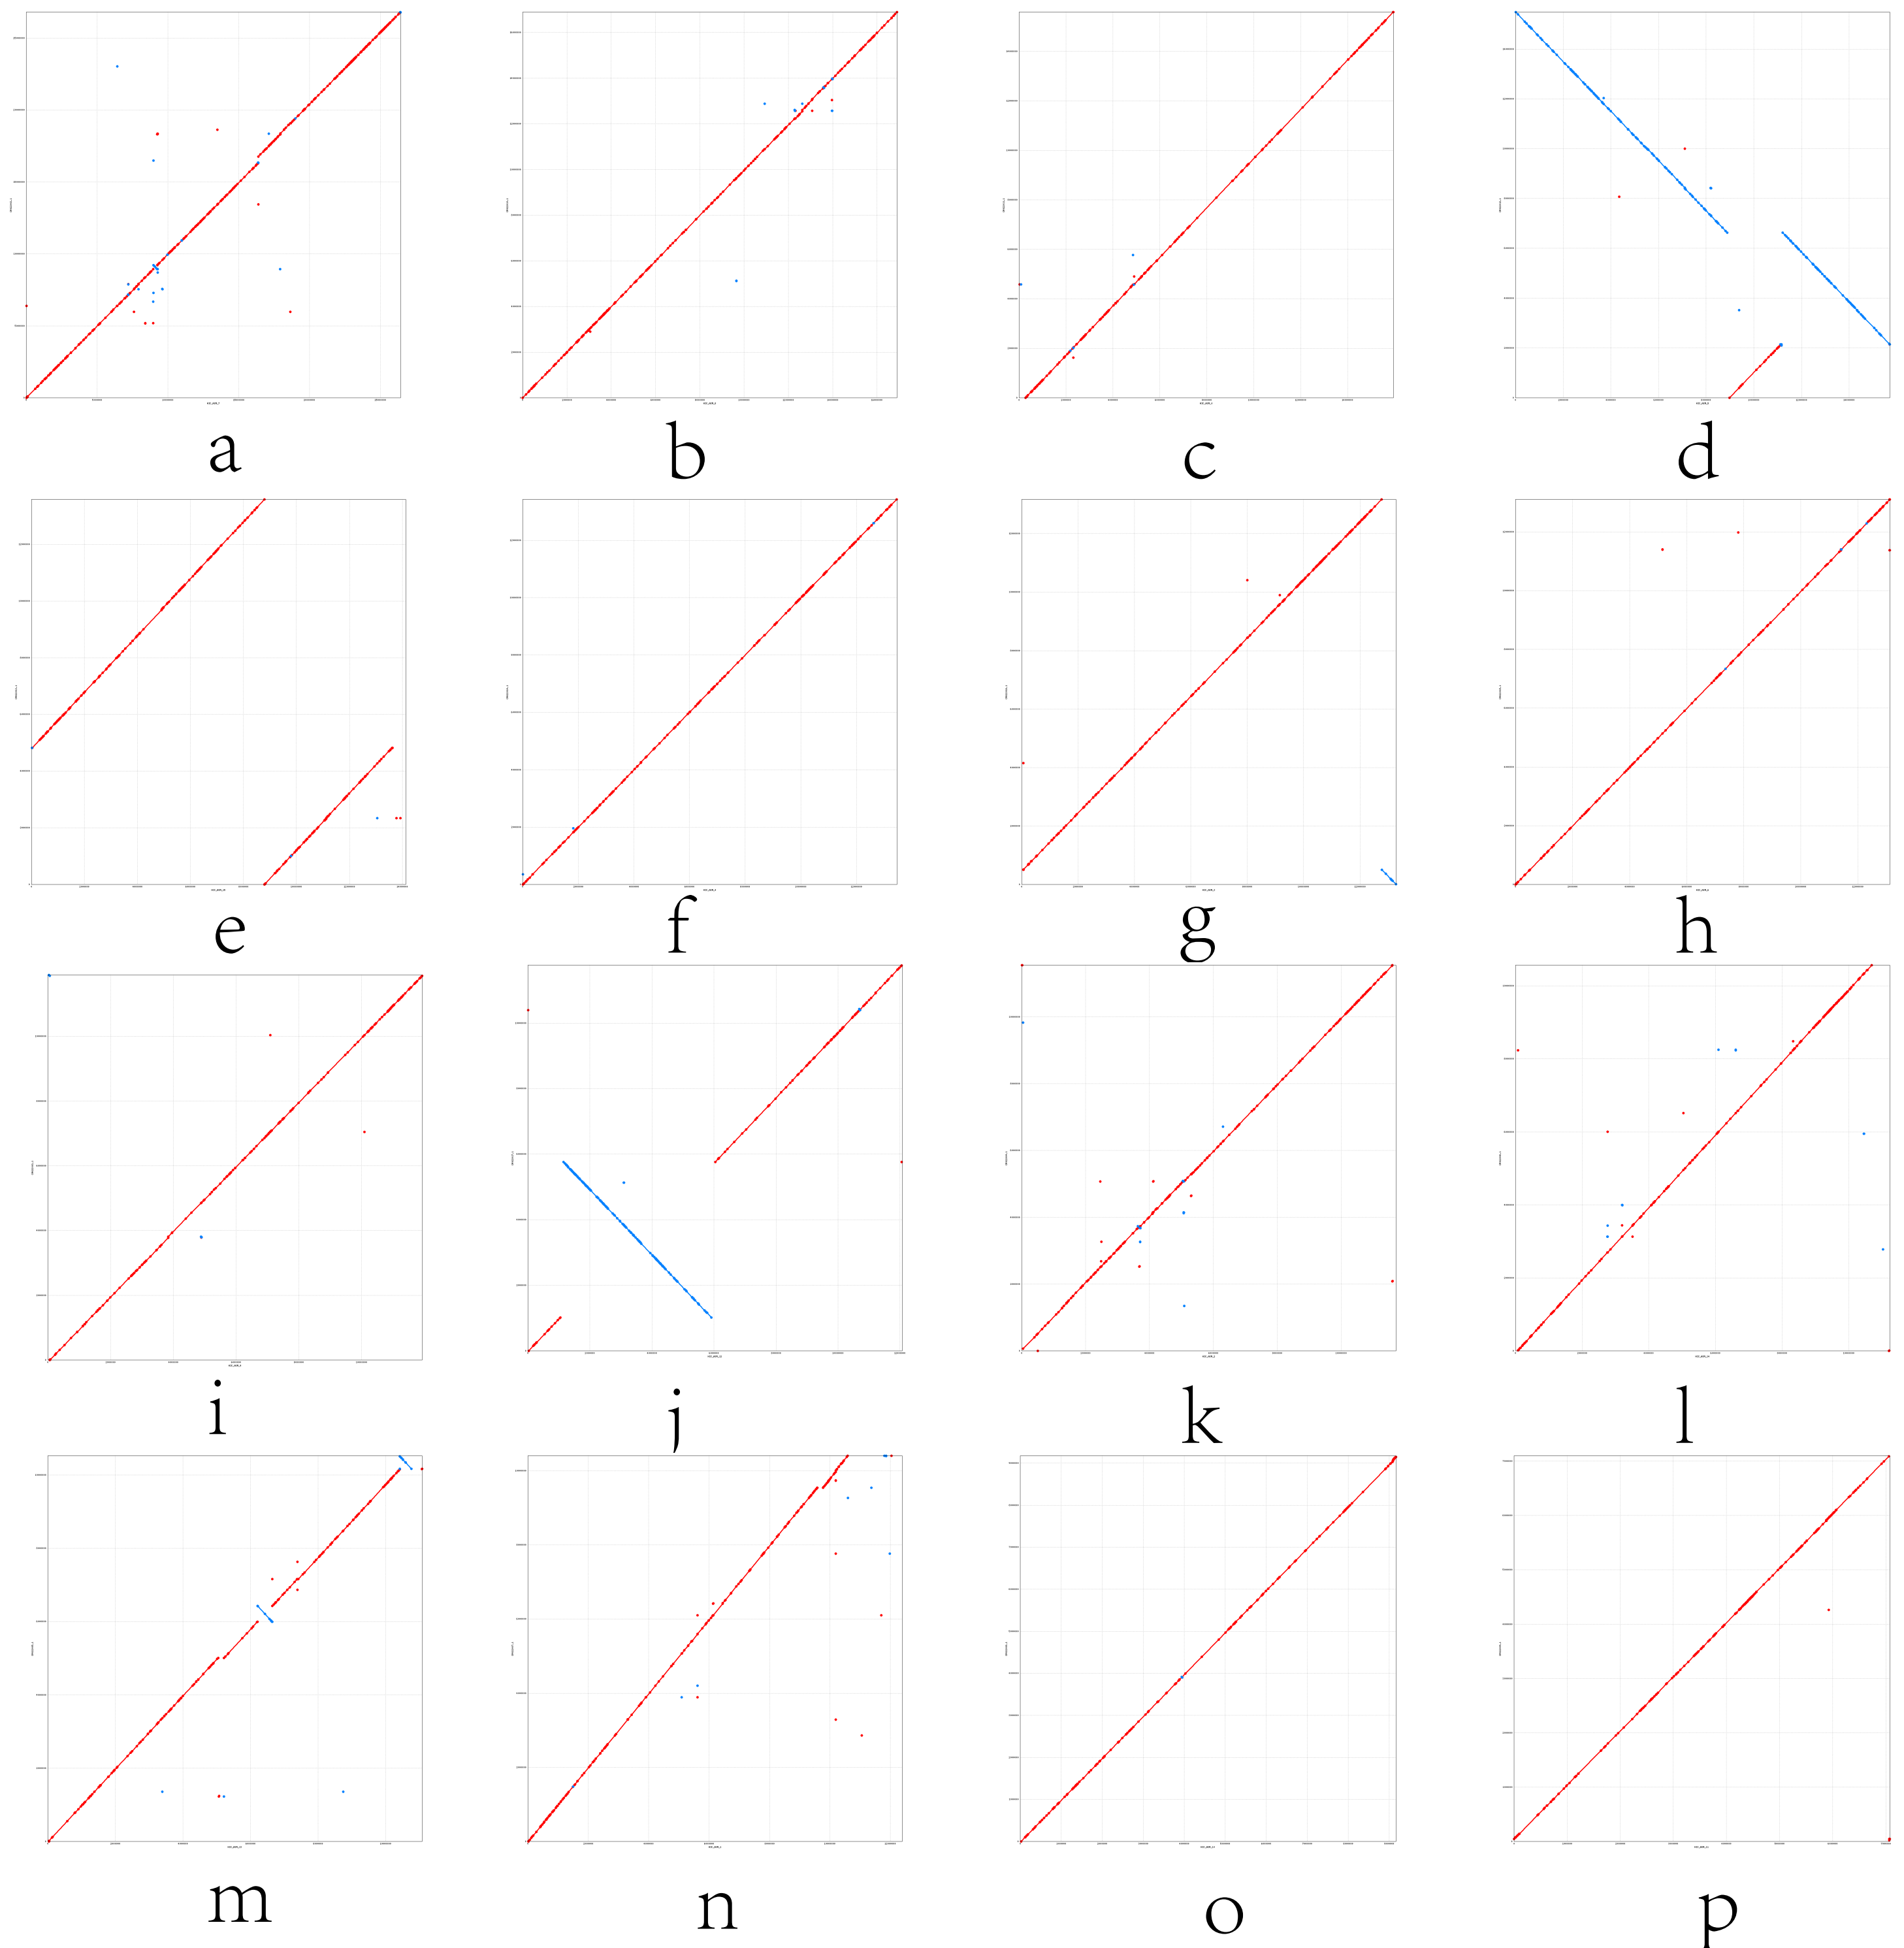

**Figure S2.** Collinearity of chromosomes between Aba and Baisha, the x-axis represents the chromosomes from Aba, y-axis represents the corresponding chromosomes from Baisha, from a-p means different homol-ogous chromosome.
