# Supplementary material for: De Novo Genome Assembly of Chinese Plateau Honeybee Unravels Intraspecies Genetic Diversity in the Eastern Honeybee, Apis cerana
Source: MDPI journal article supplement (doi:10.3390/insects12100891), 2021-10-01
Supplement: s1 [file s1]

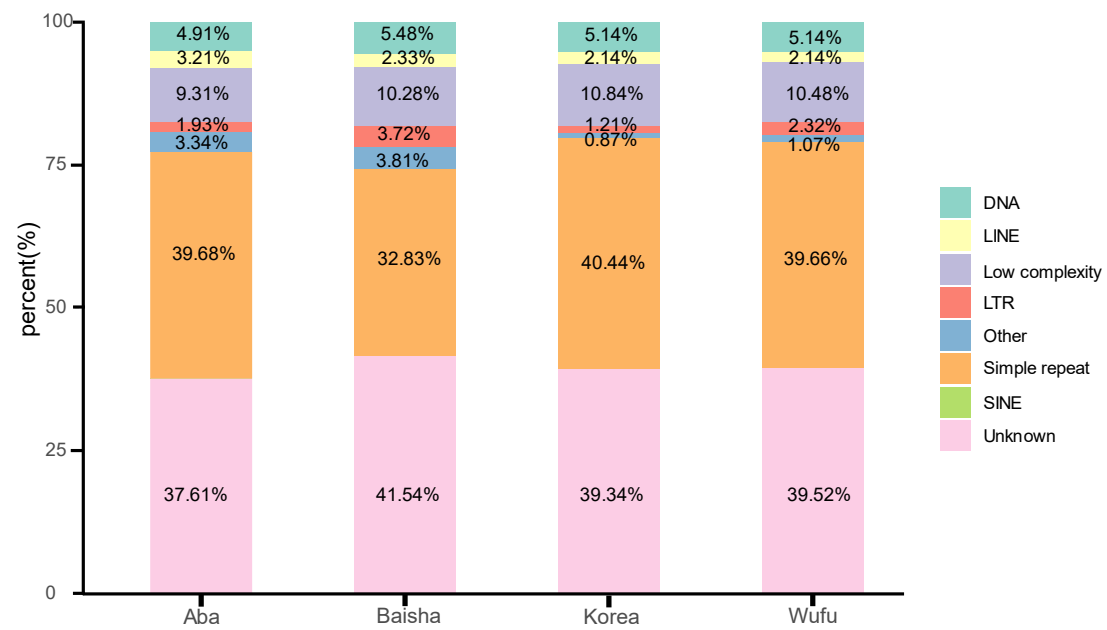

**Figure S4.** The proportion of different repeat classes in different *Apis cerana* genomes' repeat content.
