# Supplementary material for: De Novo Genome Assembly of Chinese Plateau Honeybee Unravels Intraspecies Genetic Diversity in the Eastern Honeybee, Apis cerana
Source: MDPI journal article supplement (doi:10.3390/insects12100891), 2021-10-01
Supplement: s1 [file s1]

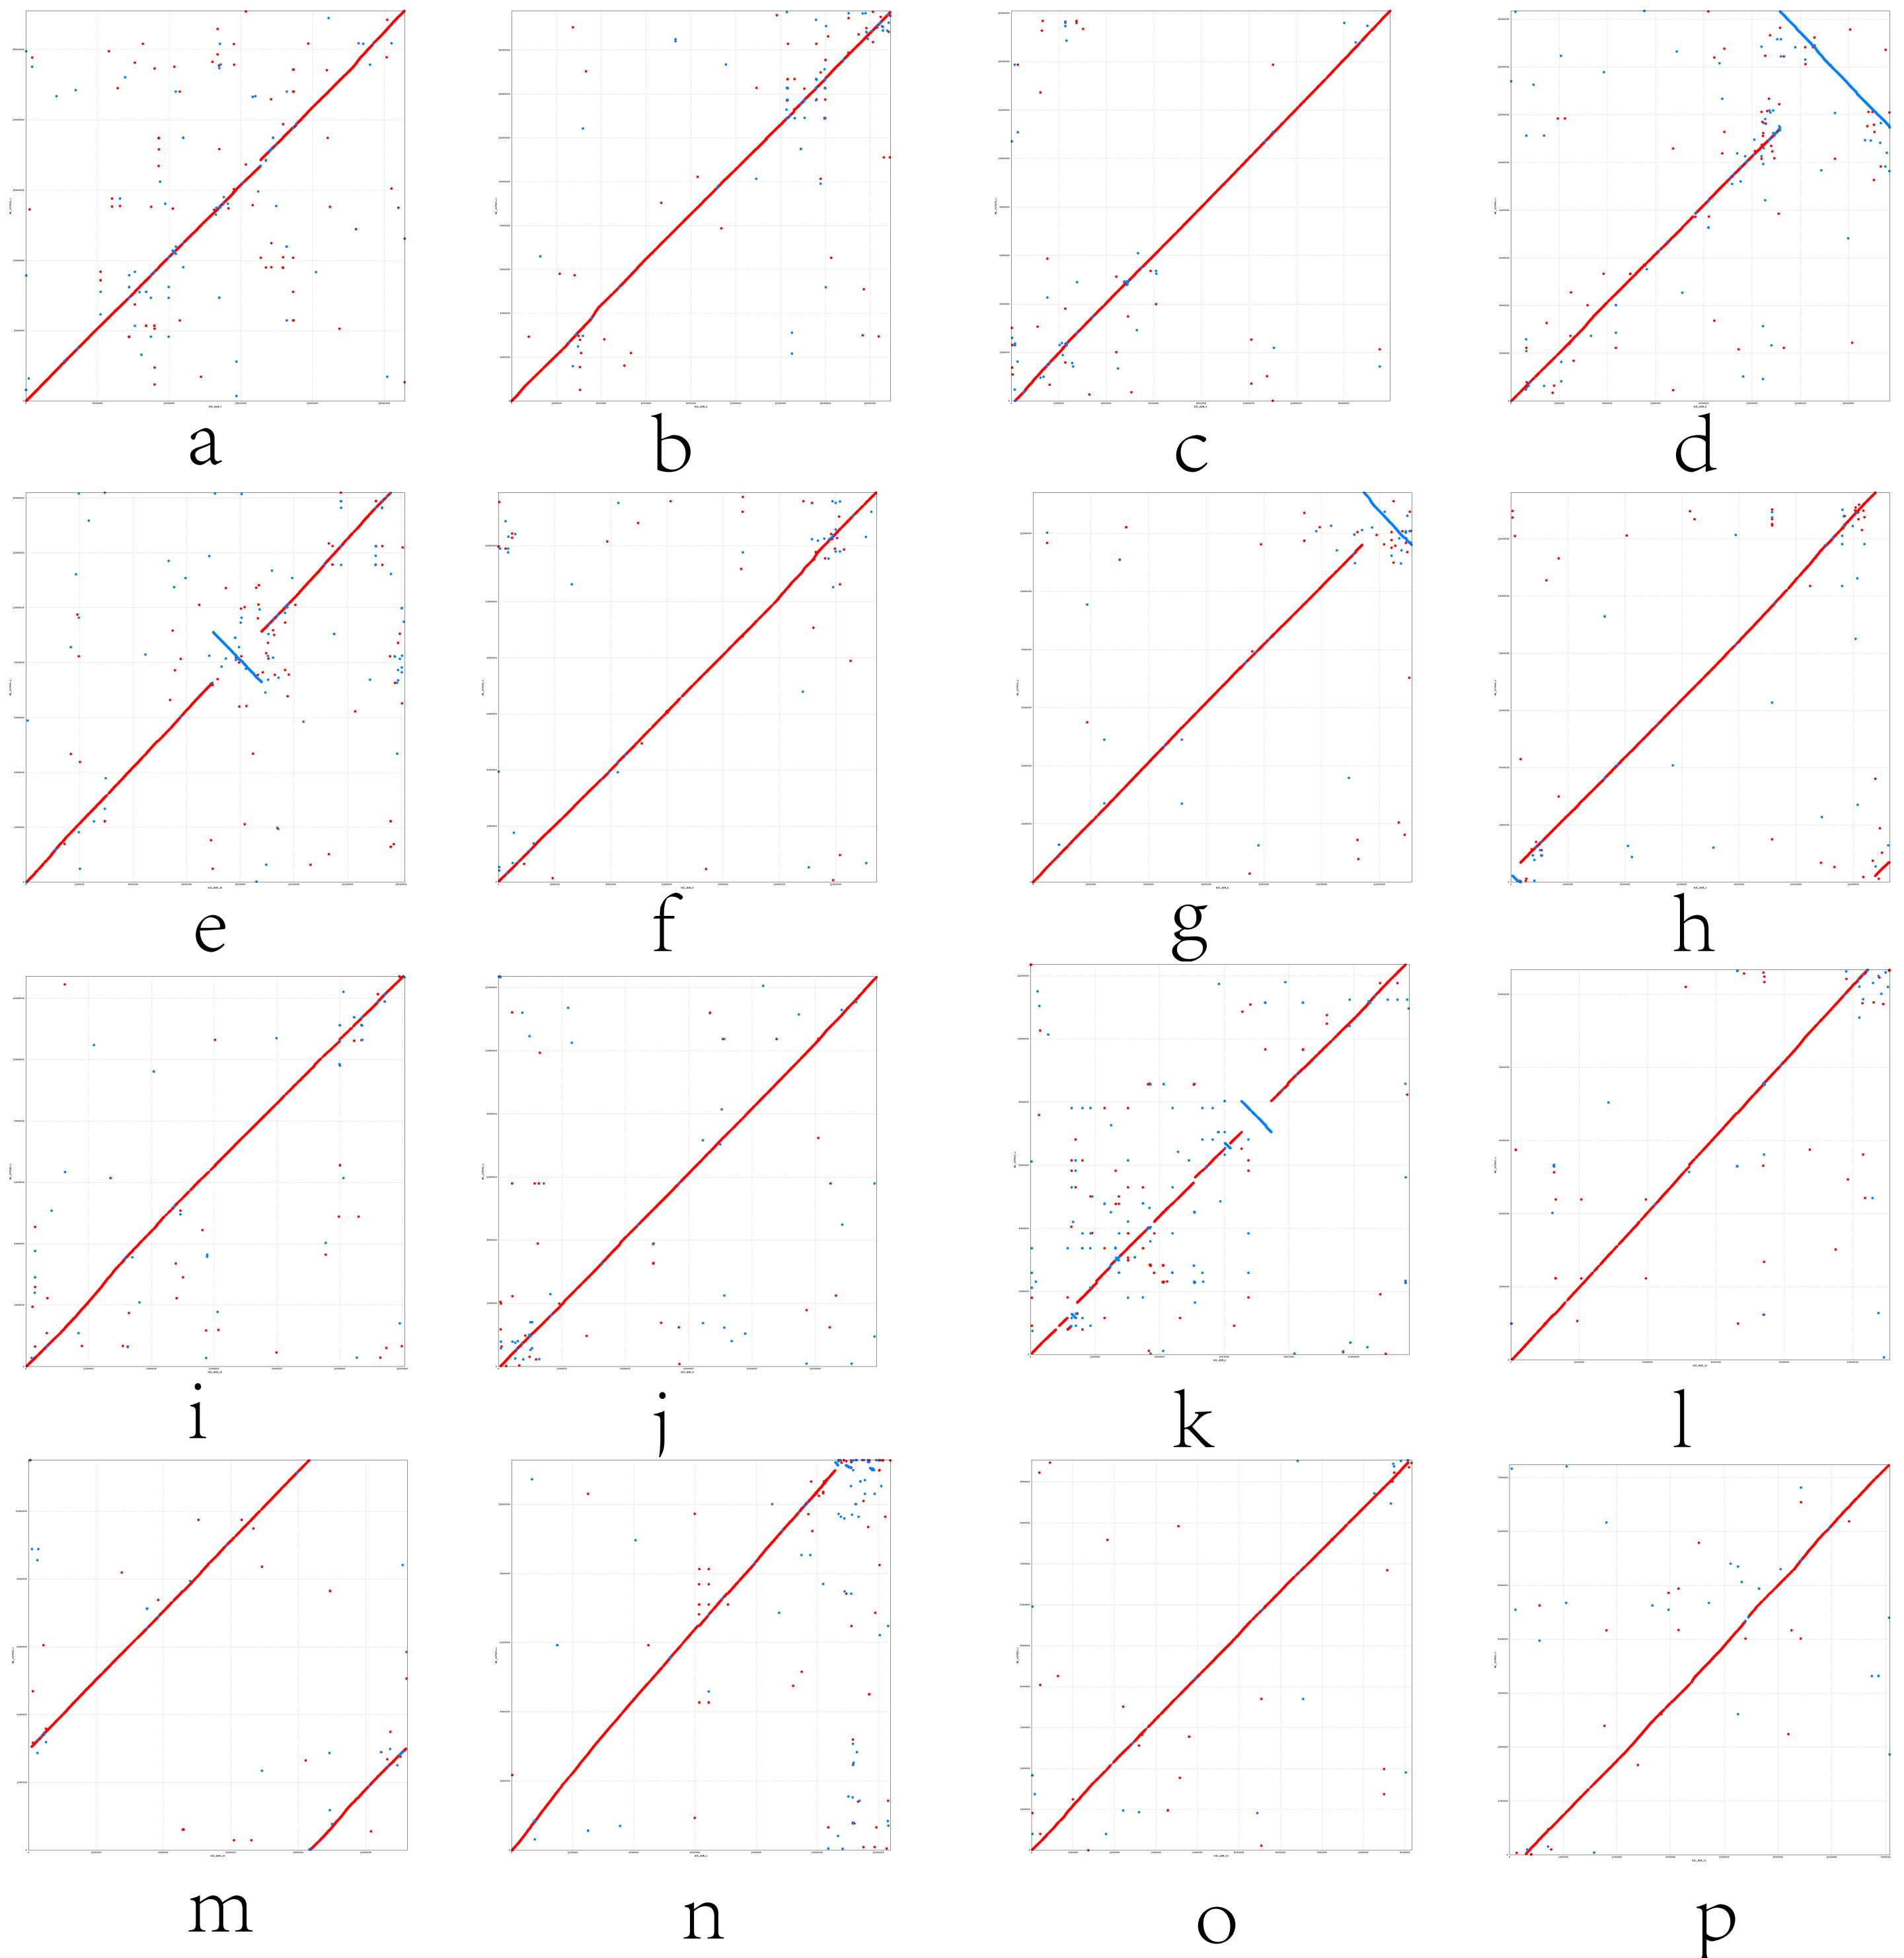

**Figure S3.** Collinearity of chromosomes between *Aba* and *Apis mellifera*, the x-axis represents the chromosomes from *Aba*, y-axis represents the corresponding chromosomes from *Apis mellifera*, from a-p means different homologous chromosome.
