# Supplementary material for: De Novo Genome Assembly of Chinese Plateau Honeybee Unravels Intraspecies Genetic Diversity in the Eastern Honeybee, Apis cerana
Source: Insects. 2021 Oct 1;12(10):891. doi: 10.3390/insects12100891 (PMC8538478; doi:10.3390/insects12100891)
Supplement: Supplementary file 1 [file insects-12-00891-s001.zip › TableS1-S9.xlsx]

## Sheet: TableS1
Table S1. Summary of sequencing data for the Apis cerana abanisis.
	Pacbio(Genome)	Illumina	Hi-C	Pacbio(Transcriptome)	Illumina(Transcriptome)
Total data(G)	128.98	37.94	36.54	31.51	12

## Sheet: TableS2
Table S2. Statistics of the BUSCO assessment.
	BUSCO groups	Percentage(%)
Complete BUSCOs	1636	98.7
Complete and single-copy BUSCOs	1625	98.3
Complete Duplicated BUSCOs	7	0.4
Fragmented BUSCOs	11	0.7
Missing BUSCOs	10	0.6
Total BUSCO groups searched	1658	100
Complete BUSCOs	1636	98.7

## Sheet: TableS3
TableS3.Results of gene structure prediction.
	Gene set	Number	Average transcript length(bp)	Average CDS length(bp)	Average exons per gene	Average exon length(bp)	Average intron length(bp)
De novo	Augustus	22723	4106.26	973.21	3.86	251.82	1093.65
	GlimmerHMM	30068	6239.62	637.54	3.47	183.88	2270.58
	SNAP	35252	5250.5	730.08	5.35	136.35	1038.11
	Geneid	34132	3687.4	761.91	2.8	272.36	1627.62
	Genscan	23036	6357.64	1175.05	4.87	241.2	1338.56
Homolog	Dqu	8541	7086.59	1654.63	6.44	256.85	998.16
	Aro	8360	6695.28	1642.21	6.4	256.61	935.82
	Nvi	5839	5407.74	1439.75	5.63	255.81	857.35
	Ace	9437	6898.26	1619.33	6.43	251.85	972.21
	Cci	8524	7096.85	1651.1	6.43	256.82	1003.06
	Bte	9100	7425.5	1692.98	6.64	254.9	1016.11
	Pdo	8477	7212.93	1671.08	6.51	256.84	1006.45
	Ame	9057	7706.8	1713.32	6.79	252.34	1035.18
RNAseq	PASA	53652	7276.22	1220.62	5.15	237.1	1459.86
	Transcripts	14925	16942.9	4060.21	8.21	494.82	1787.9
EVM		19504	5600.33	1073.28	4.41	243.31	1327.14
Pasa-update		19408	5859.29	1072.23	4.39	244.47	1413.84
Final set		11240	8256.22	1533.73	6.18	248.31	1298.61

## Sheet: TableS4
TableS4. Gene annotation statistical results.
	Number	Percent (%)
Swissprot	8629	76.8
Nr	10527	93.7
KEGG	8575	76.3
Interpro	9112	81.1
GO	6508	57.9
Pfam	8221	73.1
Unannotated	709	6.3
Annotated	10531	93.7
Total	11240	100

## Sheet: TableS5
Table S5. The new proteins in different Apis cerana strains.
Aba	Baisha	Korea		Wufu
Nr	Nr	ID	Nr	ID	Nr
-	-	XP_016904097.1	uncharacterized protein LOC107992611 [Apis cerana]	PBC25711.1	hypothetical protein APICC_01657 [Apis cerana cerana]
-	-	XP_016916175.1	60S ribosomal protein L39 [Apis cerana]	PBC28007.1	Cytochrome c oxidase protein [Apis cerana cerana]
-	-	XP_028525146.1	uncharacterized protein LOC114578166 [Apis cerana]	PBC28029.1	palmitoyltransferase [Apis cerana cerana]
-	-	XP_028525189.1	uncharacterized protein LOC114578177 isoform X1 [Apis cerana]	PBC33993.1	hypothetical protein APICC_06461 [Apis cerana cerana]
-	-	XP_016920791.1	uncharacterized protein LOC108003173 isoform X1 [Apis cerana]	PBC25825.1	hypothetical protein APICC_01583 [Apis cerana cerana]
-	-	XP_016916007.1	uncharacterized protein LOC108000277 [Apis cerana]	PBC29499.1	hypothetical protein APICC_00140 [Apis cerana cerana]
hypothetical protein WH47_06609	T-box protein H15 isoform X1	XP_028523763.1	uncharacterized protein LOC108000318 [Apis cerana]	PBC28146.1	hypothetical protein APICC_02704 [Apis cerana cerana]
-	-	XP_028523767.1	uncharacterized protein LOC114577875 [Apis cerana]	PBC29443.1	hypothetical protein APICC_03286 [Apis cerana cerana]
-	-	XP_028523765.1	uncharacterized protein LOC108000314 isoform X3 [Apis cerana]	PBC28229.1	hypothetical protein APICC_00578 [Apis cerana cerana]
-	-	XP_028525179.1	uncharacterized protein LOC114578171 isoform X1 [Apis cerana]	PBC28182.1	hypothetical protein APICC_06790 [Apis cerana cerana]
dopamine transporter isoform X3	-	XP_016919055.1	uncharacterized protein LOC108002104 [Apis cerana]	PBC25948.1	hypothetical protein APICC_04903 [Apis cerana cerana]
hypothetical protein WN51_13046	-	XP_028519976.1	uncharacterized protein LOC107992546 [Apis cerana]	PBC25970.1	hypothetical protein APICC_08751 [Apis cerana cerana]
-	-	XP_028519974.1	uncharacterized protein LOC114576818 isoform X2 [Apis cerana]	PBC25953.1	hypothetical protein APICC_01522 [Apis cerana cerana]
-	-	XP_028524602.1	uncharacterized protein LOC108001948 [Apis cerana]	PBC30771.1	hypothetical protein APICC_02663 [Apis cerana cerana]
-	-	XP_016910749.1	transient receptor potential cation channel trpm, partial [Apis cerana]	PBC30705.1	hypothetical protein APICC_02642 [Apis cerana cerana]
nuclear receptor 2C2-associated protein	-	XP_016908923.1	uncharacterized protein LOC107995771 [Apis cerana]	PBC28289.1	hypothetical protein APICC_00538 [Apis cerana cerana]
-	-	XP_028522592.1	uncharacterized protein LOC114577564 [Apis cerana]	PBC28284.1	hypothetical protein APICC_00537 [Apis cerana cerana]
hypothetical protein WH47_10422	-	XP_028522859.1	uncharacterized protein LOC114577631 [Apis cerana]	PBC33120.1	hypothetical protein APICC_04767 [Apis cerana cerana]
-	-	XP_028520776.1	uncharacterized protein LOC107994193 [Apis cerana]	PBC33126.1	hypothetical protein APICC_01422 [Apis cerana cerana]
-	-	XP_028520777.1	uncharacterized protein LOC107994195 [Apis cerana]	PBC28136.1	hypothetical protein APICC_07935 [Apis cerana cerana]
Ornithine decarboxylase antizyme 1	-	XP_016906410.1	uncharacterized protein LOC107994145 [Apis cerana]	PBC27025.1	hypothetical protein APICC_04316 [Apis cerana cerana]
-	-	XP_016911729.1	ceramide phosphoethanolamine synthase [Apis cerana]	PBC29697.1	calcitonin receptor [Apis cerana cerana]
-	-	XP_016918462.1	uncharacterized protein LOC108001782 isoform X2 [Apis cerana]	PBC33277.1	hypothetical protein APICC_08188 [Apis cerana cerana]
-	-	XP_028524559.1	uncharacterized protein LOC108001906 isoform X3 [Apis cerana]	PBC29628.1	hypothetical protein APICC_09340 [Apis cerana cerana]
PREDICTED: uncharacterized protein LOC108759766	hypothetical protein ALC60_07763	XP_028520716.1	uncharacterized protein LOC107994066 isoform X1 [Apis cerana]	PBC28301.1	Segment polarity protein dishevelled protein DVL-3 [Apis cerana cerana]
-	hypothetical protein, partial	XP_016911394.1	LOW QUALITY PROTEIN: uncharacterized protein LOC107997359, partial [Apis cerana]	PBC28336.1	hypothetical protein APICC_03780 [Apis cerana cerana]
uncharacterized protein LOC100577798 isoform X5	-	XP_028520726.1	uncharacterized protein LOC107994101 isoform X3 [Apis cerana]	PBC28335.1	hypothetical protein APICC_00523 [Apis cerana cerana]
PREDICTED: zinc finger protein 62 homolog isoform X10	-	XP_028520937.1	LOW QUALITY PROTEIN: uncharacterized protein LOC107994564, partial [Apis cerana]	PBC27111.1	hypothetical protein APICC_00962 [Apis cerana cerana]
-	-	XP_016919958.1	uncharacterized protein LOC108002663 [Apis cerana]	PBC27088.1	hypothetical protein APICC_04273 [Apis cerana cerana]
-	-	XP_028520174.1	uncharacterized protein LOC114576870 [Apis cerana]	PBC33203.1	hypothetical protein APICC_04604 [Apis cerana cerana]
-	-	XP_028520176.1	vitellogenin-2 [Apis cerana]	PBC32021.1	hypothetical protein APICC_02128 [Apis cerana cerana]
-	-	XP_016919993.1	histidine-rich glycoprotein-like [Apis cerana]	PBC29757.1	hypothetical protein APICC_02987 [Apis cerana cerana]
-	reverse transcriptase	XP_016909649.1	LOW QUALITY PROTEIN: uncharacterized protein LOC107996208 [Apis cerana]	PBC27119.1	hypothetical protein APICC_04281 [Apis cerana cerana]
-	-	XP_028525048.1	putative uncharacterized protein DDB_G0271974 [Apis cerana]	PBC28403.1	hypothetical protein APICC_09965 [Apis cerana cerana]
Transmembrane protein	-	XP_016909655.2	uncharacterized protein LOC107996215 [Apis cerana]	PBC27087.1	hypothetical protein APICC_00952 [Apis cerana cerana]
-	-	XP_016909776.1	uncharacterized protein LOC107996309 [Apis cerana]	PBC28464.1	hypothetical protein APICC_06723 [Apis cerana cerana]
hypothetical protein ALC56_13712, partial	hypothetical protein WN48_06769	XP_028521780.1	uncharacterized protein LOC114577327 [Apis cerana]	PBC27251.1	hypothetical protein APICC_00930 [Apis cerana cerana]
-	-	XP_028520119.1	uncharacterized protein LOC114576853 [Apis cerana]	PBC27233.1	hypothetical protein APICC_04238 [Apis cerana cerana]
PREDICTED: uncharacterized protein LOC105149319	-	XP_028521765.1	uncharacterized protein LOC114577325 [Apis cerana]	PBC32097.1	hypothetical protein APICC_02105 [Apis cerana cerana]
-	hypothetical protein ALC56_02165	XP_028521391.1	uncharacterized protein LOC114577217 [Apis cerana]	PBC33399.1	hypothetical protein APICC_10115 [Apis cerana cerana]
-	capon-like protein isoform X3	XP_016913893.2	uncharacterized protein LOC107998883 isoform X2 [Apis cerana]	PBC27214.1	hypothetical protein APICC_04249 [Apis cerana cerana]
-	-	XP_016913954.1	uncharacterized protein LOC107998918 [Apis cerana]	PBC27244.1	hypothetical protein APICC_00928 [Apis cerana cerana]
-	-	XP_016908024.1	uncharacterized protein LOC107995159 [Apis cerana]	PBC26066.1	hypothetical protein APICC_07208 [Apis cerana cerana]
-	-	XP_028520050.1	uncharacterized protein LOC114576832 [Apis cerana]	PBC34933.1	hypothetical protein APICC_03155 [Apis cerana cerana]
hypothetical protein WH47_00156	-	XP_028520050.1	uncharacterized protein LOC114576832 [Apis cerana]	PBC34896.1	hypothetical protein APICC_00011 [Apis cerana cerana]
-	-	XP_028520059.1	uncharacterized protein LOC114576838 [Apis cerana]	PBC34873.1	hypothetical protein APICC_08476 [Apis cerana cerana]
-	-	XP_028520823.1	uncharacterized protein LOC114577036 [Apis cerana]	PBC33482.1	hypothetical protein APICC_09972 [Apis cerana cerana]
hypothetical protein WN51_02428	-	XP_028520843.1	uncharacterized protein LOC107994350 [Apis cerana]	PBC33492.1	hypothetical protein APICC_08540 [Apis cerana cerana]
-	hypothetical protein WN48_02899	XP_016907424.1	uncharacterized protein LOC107994838 [Apis cerana]	PBC30033.1	hypothetical protein APICC_08071 [Apis cerana cerana]
-	-	XP_016909394.2	uncharacterized protein LOC107996044 [Apis cerana]	PBC27295.1	hypothetical protein APICC_04220 [Apis cerana cerana]
-	-	XP_028524929.1	enolase [Apis cerana]	PBC28663.1	hypothetical protein APICC_00404 [Apis cerana cerana]
-	-	XP_028521627.1	uncharacterized protein LOC114577297 [Apis cerana]	PBC33613.1	Cytochrome b [Apis cerana cerana]
-	-	XP_028520842.1	uncharacterized protein LOC114577040 [Apis cerana]	PBC34858.1	hypothetical protein APICC_07400 [Apis cerana cerana]
-	-	XP_028522980.1	uncharacterized protein LOC114577669 [Apis cerana]	PBC31044.1	hypothetical protein APICC_02563 [Apis cerana cerana]
-	-	XP_016904188.1	uncharacterized protein LOC107992678 [Apis cerana]	PBC26134.1	hypothetical protein APICC_04799 [Apis cerana cerana]
-	-	XP_028520045.1	uncharacterized protein LOC114576830 [Apis cerana]	PBC26131.1	hypothetical protein APICC_01454 [Apis cerana cerana]
-	-	XP_028520905.1	uncharacterized protein LOC107994602 isoform X2 [Apis cerana]	PBC26135.1	hypothetical protein APICC_04800 [Apis cerana cerana]
-	-	XP_028521196.1	uncharacterized protein LOC107994061 [Apis cerana]	PBC33750.1	hypothetical protein APICC_03760 [Apis cerana cerana]
-	-	XP_028521470.1	uncharacterized protein LOC114577245 [Apis cerana]	PBC33749.1	hypothetical protein APICC_00518 [Apis cerana cerana]
-	-	XP_016904973.2	uncharacterized protein LOC107993188 isoform X2 [Apis cerana]	PBC32424.1	hypothetical protein APICC_05427 [Apis cerana cerana]
-	hypothetical protein WN51_01493	XP_016904734.1	uncharacterized protein LOC107993052 [Apis cerana]	PBC33730.1	hypothetical protein APICC_03757 [Apis cerana cerana]
-	-	XP_028521063.1	uncharacterized protein LOC114577103 [Apis cerana]	PBC32426.1	hypothetical protein APICC_01954 [Apis cerana cerana]
-	-	XP_016921428.1	histone H3.3-like type 1 [Apis cerana]	PBC32427.1	hypothetical protein APICC_05385 [Apis cerana cerana]
-	-	XP_028522408.1	uncharacterized protein LOC114577514 [Apis cerana]	PBC33759.1	hypothetical protein APICC_00364 [Apis cerana cerana]
-	-	XP_028523297.1	LOW QUALITY PROTEIN: uncharacterized protein LOC114577734 [Apis cerana]	PBC33768.1	hypothetical protein APICC_00275 [Apis cerana cerana]
-	zinc finger protein 330 homolog	XP_016915371.1	uncharacterized protein LOC107999818 [Apis cerana]	PBC28904.1	hypothetical protein APICC_03531 [Apis cerana cerana]
-	-	XP_028522410.1	LOW QUALITY PROTEIN: uncharacterized protein LOC107997687 [Apis cerana]	PBC31067.1	hypothetical protein APICC_06053 [Apis cerana cerana]
PREDICTED: cAMP-specific 3',5'-cyclic phosphodiesterase, isoforms N/G-like isoform X9	-	XP_028522422.1	uncharacterized protein LOC114577519 [Apis cerana]	PBC27544.1	Cytochrome c-2 [Apis cerana cerana]
-	-	XP_028523165.1	uncharacterized protein LOC114577711 [Apis cerana]	PBC28873.1	hypothetical protein APICC_00355 [Apis cerana cerana]
-	-	XP_028523162.1	LOW QUALITY PROTEIN: uncharacterized protein LOC107999131 [Apis cerana]	PBC26237.1	hypothetical protein APICC_00981 [Apis cerana cerana]
-	-	XP_028524020.1	uncharacterized protein LOC108000911 [Apis cerana]	PBC26250.1	hypothetical protein APICC_01403 [Apis cerana cerana]
-	-	XP_028525428.1	LOW QUALITY PROTEIN: uncharacterized protein LOC108003628 [Apis cerana]	PBC27515.1	hypothetical protein APICC_04099 [Apis cerana cerana]
-	-	XP_028524842.1	uncharacterized protein LOC108002414 [Apis cerana]	PBC31229.1	hypothetical protein APICC_02490 [Apis cerana cerana]
-	-	XP_028524846.1	uncharacterized protein LOC114578106 [Apis cerana]	PBC31292.1	hypothetical protein APICC_05951 [Apis cerana cerana]
-	-	XP_028520945.1	uncharacterized protein LOC114577069 [Apis cerana]	PBC28941.1	hypothetical protein APICC_00314 [Apis cerana cerana]
-	cuticle protein 38	XP_016907331.1	uncharacterized protein LOC107994791 [Apis cerana]	PBC26315.1	hypothetical protein APICC_01384 [Apis cerana cerana]
-	-	XP_028520992.1	uncharacterized protein LOC114577083 [Apis cerana]	PBC26332.1	hypothetical protein APICC_09976 [Apis cerana cerana]
-	-	XP_028525331.1	uncharacterized protein LOC114578209 isoform X1 [Apis cerana]	PBC25064.1	hypothetical protein APICC_05978 [Apis cerana cerana]
-	-	XP_016914176.1	uncharacterized protein LOC107999046 [Apis cerana]	PBC25073.1	hypothetical protein APICC_02154 [Apis cerana cerana]
-	-	XP_016916867.1	uncharacterized protein LOC108000774 [Apis cerana]	PBC25069.1	NADH-ubiquinone oxidoreductase chain [Apis cerana cerana]
PREDICTED: LOW QUALITY PROTEIN: uncharacterized protein LOC105734871	-	XP_016914348.1	uncharacterized protein LOC107999171 isoform X1 [Apis cerana]	PBC25066.1	hypothetical protein APICC_09128 [Apis cerana cerana]
-	-	XP_028523157.1	uncharacterized protein LOC114577707 [Apis cerana]	PBC31319.1	hypothetical protein APICC_05943 [Apis cerana cerana]
-	-	XP_016916719.1	uncharacterized protein LOC108000704 [Apis cerana]	PBC31320.1	hypothetical protein APICC_02468 [Apis cerana cerana]
Membrane-bound transcription factor site-2 protease	-	XP_016919451.2	uncharacterized protein LOC108002339 isoform X2 [Apis cerana]	PBC30112.1	hypothetical protein APICC_06388 [Apis cerana cerana]
-	-	XP_028521519.1	sperm mitochondrial-associated cysteine-rich protein-like [Apis cerana]	PBC30049.1	hypothetical protein APICC_06389 [Apis cerana cerana]
-	-	XP_028525550.1	uncharacterized protein LOC114578257 [Apis cerana]	PBC27692.1	hypothetical protein APICC_04062 [Apis cerana cerana]
-	-	XP_016921909.1	uncharacterized protein LOC108003876 [Apis cerana]	PBC27720.1	hypothetical protein APICC_00766 [Apis cerana cerana]
-	-	XP_028525561.1	uncharacterized protein LOC114578262 [Apis cerana]	PBC25126.1	homeobox protein [Apis cerana cerana]
-	Protein deadpan	XP_028522510.1	uncharacterized protein LOC114577542 isoform X2 [Apis cerana]	PBC25138.1	hypothetical protein APICC_01965 [Apis cerana cerana]
-	-	XP_028525741.1	uncharacterized protein LOC108004240 [Apis cerana]	PBC25150.1	hypothetical protein APICC_01960 [Apis cerana cerana]
-	-	XP_028523240.1	uncharacterized protein LOC114577722 [Apis cerana]	PBC25187.1	hypothetical protein APICC_01947 [Apis cerana cerana]
-	-	XP_016914671.1	uncharacterized protein LOC107999389 [Apis cerana]	PBC31394.1	hypothetical protein APICC_09979 [Apis cerana cerana]
-	-	XP_016917535.1	uncharacterized protein LOC108001163 [Apis cerana]	PBC31421.1	hypothetical protein APICC_05878 [Apis cerana cerana]
-	-	XP_016917462.1	uncharacterized protein LOC108001111 [Apis cerana]	PBC26492.1	hypothetical protein APICC_01313 [Apis cerana cerana]
-	-	XP_016917462.1	uncharacterized protein LOC108001111 [Apis cerana]	PBC25219.1	hypothetical protein APICC_05240 [Apis cerana cerana]
-	-	XP_028521080.1	uncharacterized protein LOC114577110 isoform X1 [Apis cerana]	PBC25248.1	hypothetical protein APICC_05231 [Apis cerana cerana]
-	-	XP_028521071.1	uncharacterized protein LOC114577109 [Apis cerana]	PBC25286.1	hypothetical protein APICC_01826 [Apis cerana cerana]
-	-	XP_028520340.1	LOW QUALITY PROTEIN: uncharacterized protein LOC114576903 [Apis cerana]	PBC31473.1	hypothetical protein APICC_02288 [Apis cerana cerana]
PREDICTED: uncharacterized protein LOC102676607	-	XP_016921704.1	uncharacterized protein LOC108003740 [Apis cerana]	PBC34536.1	hypothetical protein APICC_10159 [Apis cerana cerana]
-	-	XP_028522443.1	uncharacterized protein LOC114577526 [Apis cerana]	PBC34627.1	hypothetical protein APICC_05851 [Apis cerana cerana]
-	-	XP_016907344.1	LOW QUALITY PROTEIN: uncharacterized protein LOC107994801 [Apis cerana]	PBC34608.1	hypothetical protein APICC_02356 [Apis cerana cerana]
-	-	XP_016914769.2	uncharacterized protein LOC107999438 [Apis cerana]	PBC34649.1	hypothetical protein APICC_02381 [Apis cerana cerana]
-	-	XP_028522482.1	uncharacterized protein LOC107997777 [Apis cerana]	PBC34585.1	hypothetical protein APICC_05832 [Apis cerana cerana]
-	-	XP_016907393.1	cilia- and flagella-associated protein 299-like [Apis cerana]	PBC26717.1	Transmembrane protein [Apis cerana cerana]
-	-	XP_028521058.1	uncharacterized protein LOC114577099 [Apis cerana]	PBC34698.1	hypothetical protein APICC_05877 [Apis cerana cerana]
-	-	XP_028521065.1	LOW QUALITY PROTEIN: uncharacterized protein LOC107994756 [Apis cerana]	PBC25324.1	GlcNAc-binding protein A [Apis cerana cerana]
-	hypothetical protein WN51_09955	XP_028524096.1	uncharacterized protein LOC114577935 [Apis cerana]	PBC25373.1	hypothetical protein APICC_01797 [Apis cerana cerana]
-	-	XP_016914403.1	putative uncharacterized protein DDB_G0277255 [Apis cerana]	PBC32955.1	hypothetical protein APICC_01642 [Apis cerana cerana]
PREDICTED: LOW QUALITY PROTEIN: protein rhomboid-like	-	XP_028522444.1	filamin-binding LIM protein 1-like isoform X1 [Apis cerana]	PBC29001.1	hypothetical protein APICC_00260 [Apis cerana cerana]
-	-	XP_016911954.1	uncharacterized protein LOC107997698 [Apis cerana]	PBC30338.1	hypothetical protein APICC_02812 [Apis cerana cerana]
-	-	XP_028522679.1	LOW QUALITY PROTEIN: uncharacterized protein LOC114577589 [Apis cerana]	PBC34630.1	hypothetical protein APICC_02368 [Apis cerana cerana]
-	probable G-protein coupled receptor Mth-like 1	XP_016915365.1	uncharacterized protein LOC107999847 [Apis cerana]	PBC34581.1	hypothetical protein APICC_05829 [Apis cerana cerana]
-	-	XP_016912653.1	uncharacterized protein LOC107998115 [Apis cerana]	PBC34629.1	hypothetical protein APICC_02367 [Apis cerana cerana]
-	-	XP_028522676.1	nucleolar protein 58-like isoform X1 [Apis cerana]	PBC26817.1	NADH-ubiquinone oxidoreductase chain [Apis cerana cerana]
-	-	XP_028522694.1	uncharacterized protein LOC114577595 [Apis cerana]	PBC34621.1	hypothetical protein APICC_05848 [Apis cerana cerana]
Serine/threonine-protein kinase Doa, partial	-	XP_028525618.1	uncharacterized protein LOC108004018 isoform X7 [Apis cerana]	PBC26731.1	hypothetical protein APICC_01110 [Apis cerana cerana]
-	-	XP_028520507.1	uncharacterized protein LOC114576948 [Apis cerana]	PBC26755.1	hypothetical protein APICC_04427 [Apis cerana cerana]
-	-	XP_028525673.1	ion transport peptide-like isoform X3 [Apis cerana]	PBC25454.1	hypothetical protein APICC_01767 [Apis cerana cerana]
-	-	XP_016905659.1	uncharacterized protein LOC107993643 [Apis cerana]	PBC30391.1	hypothetical protein APICC_02791 [Apis cerana cerana]
hypothetical protein EAG_09879	-	XP_016915264.1	neural-cadherin-like [Apis cerana]	PBC30471.1	hypothetical protein APICC_07962 [Apis cerana cerana]
-	-	XP_028521828.1	uncharacterized protein LOC114577339 [Apis cerana]	PBC34701.1	hypothetical protein APICC_05593 [Apis cerana cerana]
-	-	XP_016912886.1	uncharacterized protein LOC107998226 isoform X1 [Apis cerana]	PBC29115.1	hypothetical protein APICC_00231 [Apis cerana cerana]
-	-	XP_028523373.1	uncharacterized protein LOC107999655 isoform X1 [Apis cerana]	PBC29196.1	hypothetical protein APICC_00254 [Apis cerana cerana]
-	-	XP_028520448.1	uncharacterized protein LOC107993488 isoform X3 [Apis cerana]	PBC26942.1	hypothetical protein APICC_01009 [Apis cerana cerana]
-	hypothetical protein WN48_05940	XP_028525645.1	uncharacterized protein LOC114578279 [Apis cerana]	PBC25624.1	hypothetical protein APICC_01682 [Apis cerana cerana]
hypothetical protein WN51_02921, partial	-	XP_016909955.1	uncharacterized protein LOC107996429 [Apis cerana]	PBC25516.1	hypothetical protein APICC_01716 [Apis cerana cerana]
-	-	XP_028522582.1	uncharacterized protein LOC114577560 [Apis cerana]	PBC26917.1	hypothetical protein APICC_04407 [Apis cerana cerana]
uncharacterized protein LOC113219163	-	XP_028522558.1	uncharacterized protein LOC114577555 [Apis cerana]	PBC26915.1	hypothetical protein APICC_01066 [Apis cerana cerana]
hypothetical protein WN48_01194	-	XP_016915146.1	uncharacterized protein LOC107999677 [Apis cerana]	PBC25542.1	hypothetical protein APICC_01703 [Apis cerana cerana]
-	-	XP_028522556.1	uncharacterized protein LOC107997938 isoform X3 [Apis cerana]	PBC31706.1	hypothetical protein APICC_09858 [Apis cerana cerana]
-	-	XP_028522560.1	uncharacterized protein LOC114577557 isoform X2 [Apis cerana]
-	-	XP_016915064.1	uncharacterized protein LOC107999624 [Apis cerana]
hypothetical protein WN48_01098	-	XP_028522021.1	uncharacterized protein LOC114577396 [Apis cerana]
-	-	XP_028521941.1	uncharacterized protein LOC107996741 [Apis cerana]
PREDICTED: baculoviral IAP repeat-containing protein 5-like isoform X1	-	XP_016910416.1	uncharacterized protein LOC107996740 [Apis cerana]
-	-	XP_016913305.1	uncharacterized protein LOC107998506 [Apis cerana]
-	-	XP_028522851.1	uncharacterized protein LOC114577628 [Apis cerana]
-	-	XP_028519872.1	uncharacterized protein LOC114576799 [Apis cerana]
-	-	XP_016907992.1	actin cytoskeleton-regulatory complex protein PAN1 isoform X1 [Apis cerana]
hypothetical protein WN48_08260	-	XP_016922592.1	uncharacterized protein LOC108004307 [Apis cerana]
-	-	XP_028521212.1	LOW QUALITY PROTEIN: uncharacterized protein LOC107995028, partial [Apis cerana]
UDP-N-acetylglucosamine--peptide N-acetylglucosaminyltransferase 110 kDa subunit isoform X2	-	XP_016913117.1	serine protease inhibitor 3-like [Apis cerana]
-	-	XP_028522811.1	uncharacterized protein LOC114577622 [Apis cerana]
-	-	XP_028522040.1	uncharacterized protein LOC107996813 isoform X3 [Apis cerana]
hypothetical protein ALC57_08405, partial	hypothetical protein RF55_3230	XP_028522777.1	LOW QUALITY PROTEIN: uncharacterized protein LOC107998301 [Apis cerana]
hypothetical protein WN51_12834	-	XP_028523516.1	LOW QUALITY PROTEIN: uncharacterized protein LOC114577811 [Apis cerana]
hypothetical protein WH47_07538	-	XP_028525741.1	uncharacterized protein LOC108004240 [Apis cerana]
-	-	XP_028525733.1	uncharacterized protein LOC108004215 [Apis cerana]
-	-	XP_028524992.1	LHFPL tetraspan subfamily member 6 protein-like [Apis cerana]
-	-	XP_016915362.1	uncharacterized protein LOC107999845 [Apis cerana]
-	-	XP_028522754.1	uncharacterized protein LOC114577611 [Apis cerana]
-	-	XP_028522769.1	uncharacterized protein LOC114577615 [Apis cerana]
-	-	XP_028522048.1	uncharacterized protein LOC114577409 isoform X2 [Apis cerana]
hypothetical protein WN51_12606	-	XP_028523026.1	uncharacterized protein LOC114577681 isoform X1 [Apis cerana]
-	-	XP_028522195.1	uncharacterized protein LOC114577443 isoform X3 [Apis cerana]
-	-	XP_028520549.1	uncharacterized protein LOC107993691 isoform X4 [Apis cerana]
-	-	XP_016905739.1	uncharacterized protein LOC107993697 [Apis cerana]
-	-	XP_028520086.1	keratin, type I cytoskeletal 10-like [Apis cerana]
-	-	XP_028522770.1	LOW QUALITY PROTEIN: uncharacterized protein LOC108004411 [Apis cerana]
-	-	XP_028524351.1	LOW QUALITY PROTEIN: uncharacterized protein LOC108001559, partial [Apis cerana]
-	protein kinase, putative	XP_028524281.1	uncharacterized protein LOC114577993 [Apis cerana]
-	-	XP_028524298.1	uncharacterized protein LOC108001471 isoform X4 [Apis cerana]
-	-	XP_028521300.1	protein FAM133-like [Apis cerana]
-	-	XP_028521314.1	uncharacterized protein LOC114577206 [Apis cerana]
-	-	XP_028521269.1	uncharacterized protein LOC114577188, partial [Apis cerana]
-	-	XP_028522033.1	uncharacterized protein LOC114577401 [Apis cerana]
-	-	XP_028524236.1	uncharacterized protein LOC108001326 isoform X2 [Apis cerana]
-	-	XP_016913380.1	uncharacterized protein LOC107998559 [Apis cerana]
-	-	XP_016910791.1	DNA-directed RNA polymerases I, II, and III subunit RPABC4 [Apis cerana]
-	-	XP_028522109.1	uncharacterized protein LOC107996965, partial [Apis cerana]
-	-	XP_016913456.1	eclosion hormone [Apis cerana]
-	-	XP_016910797.1	uncharacterized protein LOC107996979 [Apis cerana]
-	-	XP_028524262.1	uncharacterized protein LOC114577987 [Apis cerana]
-	-	XP_028524243.1	LOW QUALITY PROTEIN: uncharacterized protein LOC108001425 [Apis cerana]
-	-	XP_028524221.1	leucine-rich repeat extensin-like protein 3 [Apis cerana]
-	-	XP_028524253.1	uncharacterized protein LOC108001321 [Apis cerana]
-	-	XP_016922808.2	LOW QUALITY PROTEIN: uncharacterized protein LOC108004426 [Apis cerana]
-	-	XP_028519905.1	LOW QUALITY PROTEIN: uncharacterized protein LOC108004493 [Apis cerana]
-	-	XP_016910675.1	U8-agatoxin-Ao1a isoform X2 [Apis cerana]
-	-	XP_028519861.1	uncharacterized protein LOC108004419 [Apis cerana]
-	-	XP_028521246.1	LOW QUALITY PROTEIN: uncharacterized protein LOC114577177 [Apis cerana]
-	-	XP_028522332.1	uncharacterized protein LOC114577490 isoform X2 [Apis cerana]
PREDICTED: uncharacterized protein LOC105735644, partial	-	XP_028522327.1	uncharacterized protein LOC107997381 [Apis cerana]
-	-	XP_028523717.1	uncharacterized protein LOC108000615 [Apis cerana]
-	-	XP_028522259.1	uncharacterized protein LOC107997308 [Apis cerana]
-	-	XP_028523606.1	uncharacterized protein LOC114577826 [Apis cerana]
-	-	XP_028522334.1	uncharacterized protein LOC114577491 [Apis cerana]
-	-	XP_016911450.1	uncharacterized protein LOC107997400 [Apis cerana]
-	-	XP_028525317.1	uncharacterized protein LOC114578202 [Apis cerana]
-	-	XP_028524438.1	LOW QUALITY PROTEIN: uncharacterized protein LOC114578033 [Apis cerana]
hypothetical protein WN51_04402	-	XP_016918429.1	N,O-diacetylmuramidase-like, partial [Apis cerana]
PREDICTED: uncharacterized protein LOC100876789 isoform X3	-	XP_028523574.1	LOW QUALITY PROTEIN: uncharacterized protein LOC114577821 [Apis cerana]
-	-	XP_016918487.1	uncharacterized protein LOC108001791 [Apis cerana]
-	-	XP_016918492.1	uncharacterized protein LOC108001795 [Apis cerana]
Protein disabled	-	XP_028524480.1	uncharacterized protein LOC108001806 isoform X1 [Apis cerana]
-	-	XP_028521442.1	uncharacterized protein LOC114577237 [Apis cerana]
-	-	XP_016906097.1	uncharacterized protein LOC107993928 isoform X2 [Apis cerana]
-	-	XP_028522216.1	uncharacterized protein LOC114576760 [Apis cerana]
PREDICTED: CUGBP Elav-like family member 6-like	-	XP_016905948.2	uncharacterized protein LOC107993837 [Apis cerana]
-	-	XP_028522223.1	uncharacterized protein LOC107997270 isoform X1 [Apis cerana]
-	uncharacterized protein LOC102656822 isoform X1	XP_028522220.1	LOW QUALITY PROTEIN: uncharacterized protein LOC107997283 [Apis cerana]
-	-	XP_028521395.1	uncharacterized protein LOC114577219 [Apis cerana]
PREDICTED: small integral membrane protein 13-like isoform X1	-	XP_028521396.1	LOW QUALITY PROTEIN: uncharacterized protein LOC114577220 [Apis cerana]
-	-	XP_028522187.1	uncharacterized protein LOC114577439 [Apis cerana]
-	-	XP_028522210.1	LOW QUALITY PROTEIN: uncharacterized protein LOC114577463 [Apis cerana]
-	-	XP_028525261.1	uncharacterized protein LOC114578193 [Apis cerana]
-	hypothetical protein WH47_02313	XP_016918189.1	uncharacterized protein LOC108001622 [Apis cerana]
-	-	XP_028524383.1	LOW QUALITY PROTEIN: uncharacterized protein LOC108001660 [Apis cerana]
-	-	XP_016908465.2	uncharacterized protein LOC107995453 [Apis cerana]
hypothetical protein X777_03116	-	XP_028520566.1	uncharacterized protein LOC114576963 [Apis cerana]
-	-	XP_028520581.1	LOW QUALITY PROTEIN: uncharacterized protein LOC107993805 [Apis cerana]
-	-	XP_028520587.1	uncharacterized protein LOC107993762 isoform X2 [Apis cerana]
PREDICTED: uncharacterized protein LOC105736985	-	XP_028520623.1	LOW QUALITY PROTEIN: uncharacterized protein LOC107993822 [Apis cerana]
-	-	XP_028520616.1	uncharacterized protein LOC107993812 isoform X3 [Apis cerana]
-	-	XP_028520602.1	uncharacterized protein LOC107993733 [Apis cerana]
-	-
-	-
-	-
-	-
-	-
hypothetical protein WH47_09027	-
-	-
-	hypothetical protein WN48_11052
hypothetical protein RF55_3851	-
-	-
PREDICTED: uncharacterized protein LOC102671077	-
-	-
-	hypothetical protein WN51_05233
Bromodomain-containing protein 7	muscle calcium channel subunit alpha-1 isoform X3
-	-
-	-
-	-
-	-
uncharacterized protein LOC102653994	-
-	-
-	-
PREDICTED: LOW QUALITY PROTEIN: uncharacterized protein LOC108576521	-
-	-
PREDICTED: uncharacterized protein LOC108727326	-
PREDICTED: soma ferritin-like	-
-	-
-	-
-	-
-	-
-	-
-	-
-	-
PREDICTED: UPF0668 protein C10orf76 homolog isoform X1	-
-	-
-	-
-	-
-	-
-	-
-	-
-	-
-	-
-	hypothetical protein WN48_09694
-	-
hypothetical protein WH47_03553, partial	-
-	-
-	-
-	-
-	-
-	-
PREDICTED: discoidin domain-containing receptor 2-like	-
-	-
-	-
PREDICTED: uncharacterized protein LOC105737321	-
-	-
-	-
PREDICTED: uncharacterized protein LOC105661955 isoform X2	-
-	-
-	-
-	-
-	-
-	-
-	hypothetical protein WN51_06694
G protein-coupled receptor kinase 6	-
Calcium and integrin-binding family member 3	-
PREDICTED: uncharacterized protein LOC105736525	-
-	-
-	-
-	-
-	-
-	-
-	-
-	Chymotrypsin inhibitor
-	-
-	-
-	-
-	hypothetical protein WN51_04229
-	-
-	-
-	-
uncharacterized protein LOC100576263	-
-	-
-	-
-	-
-	-
-	hypothetical protein WN51_01602
-	-
-	-
-	-
-	-
uncharacterized protein LOC107964703	-
hypothetical protein EPR50_G00032410	-
-	-
-	-
-	-
-	-
-	-
-	-
uncharacterized protein LOC107964703	-
-	-
-	-
-	hypothetical protein ALC62_00875
-	-
-	-
-	-
-	-
-	-
-	-
-	-
hypothetical protein WN48_02486	-
-	-
-	-
-	-
-	-
-	-
-	-
-	-
-	-
-	-
uncharacterized protein LOC100650069 isoform X2	-
-	-
-	-
hypothetical protein WN51_13573	-
-	-
-	-
-	-
-	-
-	-
uncharacterized protein LOC102655858	-
-	-
-	-
-	-
-	-
PREDICTED: uncharacterized protein LOC102674238	-
-	-
PREDICTED: uncharacterized protein LOC105736971	-
-	-
-	-
Kinesin-like protein KIF6	-
-	-
-	-
-	-
-	-
Protein furry like protein	-
hypothetical protein WH47_03059	-
-	-
-	-
-	-
-	-
-	-
-	-
-	-
-	-
-	-
-	-
-	-
-	-
hypothetical protein EGW08_001273	-
-	-
-	-
-	-
-	-
-	hypothetical protein WN55_09120, partial
-	-
-	-
-	-
-	-
-	uncharacterized protein LOC107998674 isoform X1
-	-
-	uncharacterized protein LOC107964981
-	-
-	-
-	-
-	-
-	-
-	-
-	-
-	-
hypothetical protein C9386_15920, partial	-
hypothetical protein BU14_0146s0007	-
Mothers against decapentaplegic like protein 6	hypothetical protein WH47_09580
hypothetical protein WN48_07662	-
-	-
-	-
-	-
-	-
-	-
-	-
-	-
-	-
-	-
-	-
-	hypothetical protein WN48_04869
-	-
-	-
-	-
-	-
uncharacterized protein LOC102654579	hypothetical protein WH47_01440
-	-
-	-
hypothetical protein WN51_02393	-
-	-
PREDICTED: uncharacterized protein LOC105736204	-
-	-
hypothetical protein DBV15_00338	-
-	-
-	-
-	-
-	-
-	-
-	-
-	-
-	-
-	-
-	-
-	-
-	-
-	-
-	-
-	-
-	-
-	-
hypothetical protein WN51_09549	-
PREDICTED: uncharacterized protein LOC108555853, partial	-
-	-
-	-
hypothetical protein WH47_03139	-
-	hypothetical protein WH47_09029
-	-
-	-
PREDICTED: uncharacterized protein LOC108552634	-
-	-
-	-
hypothetical protein WN48_11040	-
-	Nucleolar protein 4
-	-
uncharacterized protein LOC102655092	-
-	hypothetical protein BpHYR1_036253
-	-
-	-
-	-
-	-
-	-
-	-
-	-
-	-
-	-
-	-
-	-
PREDICTED: uncharacterized protein LOC105736983	prickle planar cell polarity protein 3-A isoform X4
-	zinc finger protein 665 isoform X10
Inactive tyrosine-protein kinase 7	-
-	hypothetical protein WN48_05499
-	-
-	-
-	-
-	-
-	-
-	-
-	-
putative histone-lysine N-methyltransferase 1, partial	-
-	-
-	-
uncharacterized protein LOC102653910	-
-	-
-	-
-	-
hypothetical protein WN51_10542	-
-	-
-	-
-	-
-	-
-	-
-	-
-	-
-	-
-	-
-	-
-	Synaptotagmin-like protein 5, partial
-	GATA zinc finger domain-containing protein 14-like
-	-
-	-
-	-
PREDICTED: uncharacterized protein LOC100866353 isoform X1	-
-	-
-	-
-	-
-	-
-	-
hypothetical protein DMN91_005884	-
-	-
-	-
-	-
-	-
-	-
-	-
PREDICTED: uncharacterized protein LOC100115103 isoform X1	-
-	-
-	-
-	-
-	-
-	-
hypothetical protein WN51_02392	-
-	-
-	-
-	-
-	-
-	-
-	-
-	-
-	-
-	-
-	-
-	-
homeotic protein ultrabithorax-like	-
-	-
-	-
-	-
-	-
-	-
-	-
-	-
Vesicle transport protein SEC20	uncharacterized protein LOC112214032
-	uncharacterized protein LOC112214032
-	-
-	uncharacterized protein LOC112214032
hypothetical protein WN48_03508	-
-	-
hypothetical protein CBR_g55364, partial	-
PREDICTED: LOW QUALITY PROTEIN: frizzled-2-like	-
-	-
-	-
Ubiquitin-conjugating enzyme E2 J1	-
-	-
-	-
-	-
-	-
hypothetical protein WN51_10380	-
-	Peptidyl-prolyl cis-trans isomerase CWC27 like protein
-	-
-	-
uncharacterized protein LOC114873837 isoform X1	hypothetical protein WN48_07883
uncharacterized protein LOC113463871	-
Histone-lysine N-methyltransferase, H3 lysine-79 specific, partial	-
-	-
-	-
-	-
-	-
-	-
-	-
-	-
-	-
-	-
-	-
-	-
-	-
-	-
hypothetical protein EGW08_009561	-
-	-
-	-
-	-
vesicle transport through interaction with t-SNAREs homolog 1B	-
-	WD repeat-containing protein 47 isoform X4
PREDICTED: uncharacterized protein LOC105736584 isoform X1	-
-	-
-	-
-	-
-	-
-	-
-	-
-	-
-	-
PREDICTED: homeobox protein Hox-A5-like	-
-	uncharacterized protein LOC112214032
-	-
-	reverse transcriptase family protein, partial
PREDICTED: uncharacterized protein LOC102671067	uncharacterized protein LOC111255160, partial
-	uncharacterized protein LOC112214032
-	-
-	-
-	-
-	-
-	-
-	-
-	-
-	-
-	-
-	hypothetical protein WN51_08753
-	protein sickie
-	-
-	-
-	-
-	-
-	-
-	-
uncharacterized protein LOC107997095 isoform X6	Serum response factor-binding protein 1, partial
-	-
-	-
-	-
-	hypothetical protein WN48_07175
-	-
-	-
hypothetical protein WN51_07462	-
hypothetical protein WN51_12502	-
-	-
-	-
-	-
PREDICTED: RNA-binding protein 39	-
-	-
-	-
-	-
-	-
-	-
hypothetical protein CBR_g55764	-
-	-
-	-
-	-
hypothetical protein ALC57_04185	-
-	-
hypothetical protein WN48_00014	-
-	-
ras-associated and pleckstrin homology domains-containing protein 1 isoform X1	hypothetical protein WH47_03750, partial
-	-
-	-
-	-
-	PREDICTED: sex-determining region Y protein-like
-	-
-	-
-	-
-	-
-	-
-	-
hypothetical protein WN51_06881, partial	-
-	-
-	hypothetical protein WN51_07505
-	-
protein bric-a-brac 1-like	-
-	-
-	-
-	-
-	-
hypothetical protein WN48_00191	-
-	-
-	-
-	-
hypothetical protein X777_01160	-
-	-
-	-
-	-
uncharacterized protein LOC410369	hypothetical protein WN48_01466
-	-
-	-
-	-
-	-
-	-
-	-
-	-
-	-
hypothetical protein EAG_09793	-
-	-
Luciferin 4-monooxygenase, partial	-
-	-
-	-
-	-
-	-
-	-
-	hypothetical protein WH47_09117, partial
-	Homeobox protein prospero
-	-
-	-
PREDICTED: LOW QUALITY PROTEIN: uncharacterized protein LOC105736259	-
-	-
-	hypothetical protein WN51_08726
-	-
-	-
-	-
-	-
mediator of RNA polymerase II transcription subunit 9	hypothetical protein N306_01943, partial
hypothetical protein WN51_04394	PREDICTED: uncharacterized protein LOC105737226 isoform X1
-	-
nuclear receptor coactivator 7 isoform X11	-
Protein trachealess	-
hypothetical protein WN51_06264	-
-	-
PREDICTED: uncharacterized protein LOC102681532	-
-	-
-	-
-	Growth arrest-specific protein 1
-	-
-	-
-	-
-	-
-	-
-	-
-	-
-	-
-	-
hypothetical protein WH47_09435	-
-	-
-	-
-	-
-	-
-	-
-	-
-	-
hypothetical protein WN48_05795	-
-	-
PREDICTED: furin-like protease 2-like	-
-	-
-	-
-	Hypothetical protein CBG23155, partial
-	-
-	-
-	-
-	-
-	-
PREDICTED: methyltransferase-like protein 7A	-
-	PREDICTED: uncharacterized protein LOC100882269 isoform X2
-	-
-	PREDICTED: uncharacterized protein LOC105737057
-	-
-	-
-	-
39S ribosomal protein L50, mitochondrial	-
-	-
-	hypothetical protein WH47_00578
-	-
-	-
-	-
UPF0443 protein	-
-	-
-	-
-	Protein FAM3C
-	-
-	-
-	-
-	-
-	-
-	leucine-rich repeat domain-containing protein
WW domain-containing adapter protein with coiled-coil	-
-	-
-	-
-	-
hypothetical protein WN48_07766	-
-	-
-	-
PREDICTED: UPF0669 protein C6orf120 homolog	-
-	uncharacterized protein LOC107995662 isoform X3
hypothetical protein WN51_11082	-
-	-
-	unconventional myosin-XVIIIa isoform X5
-	-
-	unconventional myosin-XVIIIa isoform X6
-	-
hypothetical protein WN48_09975	-
-	-
-	hypothetical protein EGW08_012358
-	hypothetical protein EPUS_06409
-	uncharacterized protein LOC110445189
PREDICTED: TATA-binding protein-associated factor 172	hypothetical protein WN51_02704
-	-
-
-
-
-
-
-
-
hypothetical protein parPi_0013211
-
-
-
-
-
PREDICTED: uncharacterized protein LOC102676128 isoform X3
-
-
-
-
PREDICTED: uncharacterized protein LOC102675470
-
-
-
-
hypothetical protein EAG_16283
-
-
-
-
-
-
-
-
Kv channel-interacting protein 1
-
-
-
-
-
-
-
-
histone deacetylase 4 isoform X8
-
-
hypothetical protein
-
-
-
uncharacterized protein LOC105665892
-
hypothetical protein WH47_03817
-
-
-
-
-
PREDICTED: LYR motif-containing protein 9-like isoform X1

## Sheet: TableS6
Tbale S6. Repeate content in different Apis cerana genome.
		Aba			Baisha			Korea			Wufu
		count	length（bp）	percent	count	length（bp）	percent	count	length（bp）	percent	count	length（bp）	percent
Total		342829	31320299	0.13799	324524	28360394	0.131499	291393	20615812	0.0902888	311427	22583273	0.098707
DNA:		8929	1536957	0.00677148	9012	1554161	0.0072062	7925	1060334	0.00464383	8286	1160470	0.00507218
	CMC-EnSpm	3665	247156	0.00108891	3706	257176	0.00119245	3361	227994	0.000998521	3597	248653	0.00108681
	MULE-MuDR	205	14233	6.27074e-05	194	13400	6.2132e-05	179	12536	5.49026e-05	161	11426	4.99408e-05
	PiggyBac	508	167412	0.000737579	481	154762	0.000717587	529	151182	0.000662115	502	148993	0.000651219
	TcMar-Mariner	1760	433848	0.00191144	1805	468854	0.00217394	1726	369116	0.00161658	1720	399521	0.00174623
	TcMar-Tc1	386	149355	0.000658024	346	146325	0.000678467	283	68449	0.000299779	287	79133	0.000345875
	TcMar-Tigger	216	21697	9.55921e-05	243	25158	0.00011665	201	21586	9.45379e-05	224	20803	9.09258e-05
	hAT	1	45	1.9826e-07	2	119	5.51769e-07	2	90	3.94163e-07	1	45	1.96686e-07
	hAT-Ac	1019	128251	0.000565045	1073	140906	0.000653341	887	92429	0.000404801	978	106580	0.00046584
	hAT-Charlie	239	23051	0.000101557	228	22691	0.000105212	233	22529	9.86678e-05	248	23884	0.000104392
	hAT-Tip100	3	249	1.09704e-06	9	646	2.99532e-06	11	723	3.16644e-06	6	333	1.45548e-06
	Merlin	62	10009	4.40974e-05	55	9004	4.1749e-05	57	9604	4.20616e-05	50	9073	3.96563e-05
	Dada	351	211948	0.000933795	356	185417	0.000859725	179	46549	0.000203866	225	64927	0.000283783
	PIF-Harbinger	0	0	0	0	0	0	1	56	2.45257e-07	0	0	0
	DNA	514	129703	0.000571442	514	129703	0.000601396	276	37491	0.000164195	287	47099	0.00020586
LINE:		2257	1005707	0.00443092	2402	1054530	0.00488955	1424	250042	0.00109508	1627	411903	0.00180035
	CR1	102	6017	2.65095e-05	184	11880	5.50841e-05	169	10990	4.81317e-05	95	5476	2.39345e-05
	I-Jockey	0	0	0	4	200	9.27343e-07	3	147	6.438e-07	1	64	2.79731e-07
	L1	594	187597	0.00082651	688	236210	0.00109524	390	78538	0.000343964	470	93686	0.000409483
	L1-Tx1	40	5650	2.48926e-05	37	5145	2.38559e-05	26	3418	1.49694e-05	36	4987	2.17972e-05
	L2	29	1839	8.10222e-06	50	3162	1.46613e-05	54	3432	1.50308e-05	25	1663	7.26864e-06
	Penelope	706	374730	0.00165098	624	314691	0.00145913	327	45391	0.000198794	383	85130	0.000372086
	R1	141	120432	0.000530596	118	94454	0.000437956	93	39987	0.000175127	121	62284	0.000272231
	R2	612	307595	0.00135519	645	385647	0.00178813	317	65488	0.000286811	470	157176	0.000686985
	RTE-BovB	33	1847	8.13746e-06	52	3141	1.45639e-05	45	2651	1.16103e-05	26	1437	6.28084e-06
LTR:		2344	604735	0.00266433	2459	661927	0.00306917	2125	442121	0.00193631	2257	524368	0.00229191
	Copia	630	278648	0.00122766	634	288711	0.00133867	545	193953	0.000849435	606	247174	0.00108035
	ERV1	206	18357	8.08768e-05	217	19989	9.26833e-05	197	17294	7.57407e-05	197	18196	7.95311e-05
	ERVK	406	32389	0.000142699	447	36316	0.000168387	405	32073	0.000140467	442	34792	0.000152069
	ERVL	4	263	1.15872e-06	6	452	2.09579e-06	4	277	1.21315e-06	5	336	1.46859e-06
	ERVL-MaLR	0	0	0	1	79	3.663e-07	4	250	1.0949e-06	0	0	0
	Gypsy	213	60703	0.000267444	226	60993	0.000282807	206	58403	0.000255781	222	59264	0.000259031
	Ngaro	239	93959	0.000413962	277	136132	0.000631205	117	25167	0.000110221	181	50595	0.000221141
	Pao	243	92578	0.000407878	248	91417	0.000423874	246	88636	0.000388189	240	87828	0.000383879
	LTR	403	27838	0.000122648	403	27838	0.000129077	401	26068	0.000114167	364	26183	0.000114441
SINE:		14	826	3.63917e-06	19	1121	5.19776e-06	18	1119	4.90076e-06	15	921	4.02551e-06
	5S-Deu-L2	4	209	9.20807e-07	4	248	1.1499e-06	5	292	1.27884e-06	5	312	1.36369e-06
	MIR	6	378	1.66538e-06	8	483	2.23953e-06	8	548	2.40002e-06	5	296	1.29376e-06
	tRNA	3	185	8.15068e-07	4	271	1.25655e-06	3	185	8.10224e-07	3	222	9.70318e-07
	tRNA-Deu	1	54	2.37912e-07	2	94	4.35851e-07	2	94	4.11682e-07	1	54	2.36023e-07
	tRNA-RTE	0	0	0	1	25	1.15918e-07	0	0	0	1	37	1.6172e-07
Satellite:		341	29567	0.000130265	386	33308	0.00015444	329	25252	2.76221e-05	317	27204	0.000118903
	acro	65	3758	1.65569e-05	114	6968	3.23086e-05	101	6265	2.74381e-05	60	3476	1.51929e-05
	centr	0	0	0	0	0	0	2	42	1.83943e-07	0	0	0
	Satellite	276	25809	0.000113709	272	26340	0.000122131	226	18945	8.29714e-05	257	23728	0.00010371
Retroposon:		0	0	0	4	347	1.60894e-06	1	95	4.16061e-07	0	0	0
	SVA	0	0	0	4	347	1.60894e-06	1	95	4.16061e-07	0	0	0
RC:		635	283052	0.00124706	563	312906	0.00145086	276	73823	0.000323315	307	65407	0.000285881
	Helitron	635	283052	0.00124706	563	312906	0.00145086	276	73823	0.000323315	307	65407	0.000285881
Low_complexity		48351	2916318	0.0128486	48351	2916318	0.0135221	43496	2235915	0.00979239	45475	2364512	0.0103348
SINE?		47	4620	2.03547e-05	47	4620	2.14216e-05	46	4424	1.93753e-05	42	4149	1.81345e-05
Simple_repeat		225129	12428333	0.0547564	206499	9310972	0.0431723	190511	8336110	0.0365088	203365	8955527	0.0391428
Unknown		53032	11780928	0.0519041	53032	11780928	0.0546248	46011	8110843	0.0355222	48841	8924254	0.0390061
rRNA		1523	711165	0.00313323	1523	711165	0.00329747	427	57369	0.000251253	667	127440	0.000557015
snRNA		21	2719	1.19793e-05	21	2719	1.26072e-05	26	3378	1.47943e-05	22	2628	1.14865e-05
srpRNA		1	290	1.27767e-06	1	290	1.34465e-06	1	291	1.27446e-06	1	290	1.26753e-06
tRNA		205	15082	6.64479e-05	205	15082	6.99309e-05	201	14696	6.43625e-05	205	14200	6.20654e-05

## Sheet: TableS7
Table S7. Odorant receptor in different Apis cerana strains.
ID	alignment start	alignment end	envelope start	envelope end	hmm acc	hmm name	Individual E-value	Conditional E-value
KoreaOr1	79	392	77	393	PF02949.20	7tm_6	8e-37	4.5e-41
KoreaOr2	77	385	70	385	PF02949.20	7tm_6	7.7e-36	4.3e-40
KoreaOr5	74	383	59	383	PF02949.20	7tm_6	3.4e-28	1.9e-32
KoreaOr6	63	382	59	382	PF02949.20	7tm_6	9.6e-31	5.4e-35
KoreaOr7	76	384	68	384	PF02949.20	7tm_6	9.7e-38	5.4e-42
KoreaOr8	74	390	67	390	PF02949.20	7tm_6	1e-33	5.6e-38
KoreaOr9	60	378	59	379	PF02949.20	7tm_6	5.1e-32	2.8e-36
KoreaOr10	60	380	59	380	PF02949.20	7tm_6	8.5e-29	4.7e-33
KoreaOr11	47	360	46	360	PF02949.20	7tm_6	4e-48	2.2e-52
KoreaOr12	62	381	61	382	PF02949.20	7tm_6	8.8e-50	4.9e-54
KoreaOr13	80	392	76	392	PF02949.20	7tm_6	3.7e-44	2e-48
KoreaOr14	77	391	69	392	PF02949.20	7tm_6	4.9e-41	2.7e-45
KoreaOr15	54	359	52	360	PF02949.20	7tm_6	3.5e-35	3.9e-39
KoreaOr16	81	386	70	386	PF02949.20	7tm_6	2.6e-38	1.5e-42
KoreaOr17	63	390	58	390	PF02949.20	7tm_6	2.7e-39	1.5e-43
KoreaOr18	72	387	71	388	PF02949.20	7tm_6	7.3e-37	4.1e-41
KoreaOr19	118	378	93	382	PF02949.20	7tm_6	1.9e-12	1.1e-16
KoreaOr20	100	388	70	388	PF02949.20	7tm_6	5.3e-27	3e-31
KoreaOr21	86	362	26	362	PF02949.20	7tm_6	3.1e-26	1.7e-30
KoreaOr22	64	422	64	423	PF02949.20	7tm_6	2.3e-37	1.3e-41
KoreaOr23	72	344	68	357	PF02949.20	7tm_6	1e-21	5.8e-26
KoreaOr24	68	339	55	356	PF02949.20	7tm_6	7.8e-11	4.3e-15
KoreaOr25	116	359	95	360	PF02949.20	7tm_6	3.9e-14	2.2e-18
KoreaOr26	78	358	70	359	PF02949.20	7tm_6	9.6e-12	5.4e-16
KoreaOr27	68	356	66	359	PF02949.20	7tm_6	1.5e-15	8.4e-20
KoreaOr28	72	356	67	359	PF02949.20	7tm_6	5.8e-16	3.2e-20
KoreaOr29	69	339	63	346	PF02949.20	7tm_6	2.7e-08	1.5e-12
KoreaOr31	88	388	73	388	PF02949.20	7tm_6	6.6e-28	3.7e-32
KoreaOr32	67	380	64	380	PF02949.20	7tm_6	3.5e-40	1.9e-44
KoreaOr33	71	372	68	373	PF02949.20	7tm_6	4.1e-44	2.3e-48
KoreaOr34	60	273	4	274	PF02949.20	7tm_6	1e-21	1.1e-25
KoreaOr35	60	375	57	377	PF02949.20	7tm_6	9e-35	1e-38
KoreaOr36	60	374	57	376	PF02949.20	7tm_6	1.4e-33	7.7e-38
KoreaOr37	60	371	57	373	PF02949.20	7tm_6	3.9e-36	4.3e-40
KoreaOr38	60	364	57	365	PF02949.20	7tm_6	1.5e-26	8.2e-31
KoreaOr39	60	363	57	364	PF02949.20	7tm_6	5e-37	2.8e-41
KoreaOr40	57	373	57	374	PF02949.20	7tm_6	2.4e-38	1.4e-42
KoreaOr41	83	386	68	386	PF02949.20	7tm_6	3.8e-21	2.1e-25
KoreaOr42	81	392	74	392	PF02949.20	7tm_6	1.6e-31	9.2e-36
KoreaOr43	82	384	65	384	PF02949.20	7tm_6	1.6e-20	8.8e-25
KoreaOr44	67	381	63	382	PF02949.20	7tm_6	7.8e-34	4.3e-38
KoreaOr45	60	382	58	382	PF02949.20	7tm_6	2.8e-19	1.5e-23
KoreaOr46	59	382	58	382	PF02949.20	7tm_6	4.3e-22	2.4e-26
KoreaOr47	90	400	84	400	PF02949.20	7tm_6	1.9e-37	1e-41
KoreaOr48	68	466	67	467	PF02949.20	7tm_6	5.1e-100	5.7e-104
KoreaOr49	90	402	84	402	PF02949.20	7tm_6	1.1e-33	6.3e-38
KoreaOr50	82	393	73	393	PF02949.20	7tm_6	4.8e-29	2.7e-33
KoreaOr51	82	393	73	393	PF02949.20	7tm_6	2.5e-29	1.4e-33
KoreaOr52	92	402	85	402	PF02949.20	7tm_6	2.7e-32	1.5e-36
KoreaOr53	84	392	79	392	PF02949.20	7tm_6	1.5e-33	8.5e-38
KoreaOr54	82	395	74	395	PF02949.20	7tm_6	2.8e-24	1.6e-28
KoreaOr55	83	393	76	395	PF02949.20	7tm_6	5.5e-23	3.1e-27
KoreaOr56	85	393	75	393	PF02949.20	7tm_6	7.8e-38	4.4e-42
KoreaOr57	84	392	77	392	PF02949.20	7tm_6	1.9e-34	1.1e-38
KoreaOr58	85	401	77	402	PF02949.20	7tm_6	4.2e-34	4.7e-38
KoreaOr59	98	393	76	393	PF02949.20	7tm_6	9.3e-23	5.2e-27
KoreaOr60	78	386	72	386	PF02949.20	7tm_6	2.1e-28	1.2e-32
KoreaOr61	100	392	75	393	PF02949.20	7tm_6	1.4e-20	7.6e-25
KoreaOr62	98	392	75	393	PF02949.20	7tm_6	6.7e-23	3.7e-27
KoreaOr63	98	393	80	394	PF02949.20	7tm_6	9.8e-22	5.5e-26
KoreaOr64	148	394	77	394	PF02949.20	7tm_6	3.4e-22	1.9e-26
KoreaOr65	98	393	79	394	PF02949.20	7tm_6	8.8e-22	4.9e-26
KoreaOr66	79	386	73	386	PF02949.20	7tm_6	4.2e-26	2.4e-30
KoreaOr67	100	299	95	301	PF02949.20	7tm_6	2.1e-06	1.2e-10
KoreaOr68	83	395	80	397	PF02949.20	7tm_6	1.2e-34	6.8e-39
KoreaOr69	90	396	80	396	PF02949.20	7tm_6	3.4e-32	1.9e-36
KoreaOr70	88	396	82	396	PF02949.20	7tm_6	2.9e-33	1.6e-37
KoreaOr71	87	395	80	395	PF02949.20	7tm_6	6.3e-30	3.5e-34
KoreaOr72	87	398	82	398	PF02949.20	7tm_6	1.1e-32	6.1e-37
KoreaOr73	79	386	73	386	PF02949.20	7tm_6	3.9e-24	2.2e-28
KoreaOr74	89	399	81	399	PF02949.20	7tm_6	9.7e-35	5.4e-39
KoreaOr75	4	112	1	113	PF02949.20	7tm_6	5.5e-17	3.1e-21
KoreaOr76	65	385	64	387	PF02949.20	7tm_6	7.4e-34	4.1e-38
KoreaOr77	105	381	65	381	PF02949.20	7tm_6	9.3e-43	5.2e-47
KoreaOr78	61	363	59	363	PF02949.20	7tm_6	4.2e-52	2.3e-56
KoreaOr79	61	358	58	358	PF02949.20	7tm_6	3.2e-51	1.8e-55
KoreaOr80	63	362	61	362	PF02949.20	7tm_6	3.3e-56	1.8e-60
KoreaOr81	61	359	59	359	PF02949.20	7tm_6	1.8e-52	1e-56
KoreaOr82	61	360	59	360	PF02949.20	7tm_6	9.3e-50	1e-53
KoreaOr83	60	352	59	352	PF02949.20	7tm_6	5.2e-40	2.9e-44
KoreaOr84	72	387	63	388	PF02949.20	7tm_6	6.9e-38	7.7e-42
KoreaOr85	34	349	26	349	PF02949.20	7tm_6	3.2e-40	3.6e-44
KoreaOr86	63	388	60	389	PF02949.20	7tm_6	1.8e-41	1e-45
KoreaOr87	76	386	70	386	PF02949.20	7tm_6	8e-34	4.5e-38
KoreaOr88	75	390	66	391	PF02949.20	7tm_6	2.6e-41	1.4e-45
KoreaOr89	68	391	63	391	PF02949.20	7tm_6	4.8e-44	2.7e-48
KoreaOr90	78	384	64	384	PF02949.20	7tm_6	1.2e-42	6.8e-47
KoreaOr91	72	384	63	387	PF02949.20	7tm_6	1.2e-39	1.3e-43
KoreaOr92	78	399	69	399	PF02949.20	7tm_6	8.7e-42	9.7e-46
KoreaOr93	70	389	62	389	PF02949.20	7tm_6	4.1e-44	2.3e-48
KoreaOr94	78	391	63	391	PF02949.20	7tm_6	4.2e-44	2.3e-48
KoreaOr95	61	392	60	393	PF02949.20	7tm_6	8.5e-36	4.8e-40
KoreaOr96	77	390	76	391	PF02949.20	7tm_6	8e-32	4.5e-36
KoreaOr97	17	222	5	223	PF02949.20	7tm_6	1.2e-22	6.6e-27
KoreaOr99	76	393	71	394	PF02949.20	7tm_6	1e-25	5.6e-30
KoreaOr100	72	391	70	399	PF02949.20	7tm_6	7.5e-31	4.2e-35
KoreaOr101	72	393	70	393	PF02949.20	7tm_6	5.4e-33	3e-37
KoreaOr102	62	382	59	382	PF02949.20	7tm_6	1.8e-28	9.8e-33
KoreaOr103	137	400	77	400	PF02949.20	7tm_6	4.6e-33	2.6e-37
KoreaOr104	63	390	58	390	PF02949.20	7tm_6	2.7e-39	1.5e-43
KoreaOr105	72	382	71	383	PF02949.20	7tm_6	2.4e-33	1.3e-37
KoreaOr106	77	380	61	380	PF02949.20	7tm_6	1.3e-24	7.2e-29
KoreaOr107	254	352	253	353	PF02949.20	7tm_6	5.5e-07	3.1e-11
KoreaOr108	72	344	68	357	PF02949.20	7tm_6	1e-21	5.8e-26
KoreaOr110	13	122	3	123	PF02949.20	7tm_6	4.4e-10	2.5e-14
KoreaOr111	83	391	77	391	PF02949.20	7tm_6	7.3e-34	4.1e-38
KoreaOr112	60	357	57	358	PF02949.20	7tm_6	7.5e-35	4.2e-39
KoreaOr113	89	399	79	399	PF02949.20	7tm_6	1.2e-30	6.5e-35
KoreaOr114	82	382	60	382	PF02949.20	7tm_6	4.8e-27	2.7e-31
KoreaOr115	91	397	76	397	PF02949.20	7tm_6	6.7e-28	3.8e-32
KoreaOr116	90	396	80	396	PF02949.20	7tm_6	3.4e-32	1.9e-36
KoreaOr117	89	399	83	399	PF02949.20	7tm_6	3.9e-33	2.2e-37
KoreaOr118	90	398	84	399	PF02949.20	7tm_6	2e-32	1.1e-36
KoreaOr119	105	381	77	381	PF02949.20	7tm_6	1.8e-44	1e-48
KoreaOr120	28	338	21	338	PF02949.20	7tm_6	1.9e-47	1e-51
KoreaOr121	73	380	66	380	PF02949.20	7tm_6	4e-24	2.2e-28
KoreaOr122	75	388	66	388	PF02949.20	7tm_6	2.2e-46	1.2e-50
KoreaOr123	68	387	63	388	PF02949.20	7tm_6	6.5e-38	7.3e-42
KoreaOr124	70	391	64	391	PF02949.20	7tm_6	1.1e-43	6.4e-48
KoreaOr125	75	391	65	391	PF02949.20	7tm_6	1.1e-42	6e-47
KoreaOr126	65	386	60	387	PF02949.20	7tm_6	4.7e-42	2.6e-46
KoreaOr127	70	388	64	389	PF02949.20	7tm_6	1.7e-42	9.7e-47
KoreaOr128	72	378	58	378	PF02949.20	7tm_6	1.1e-42	6e-47
KoreaOr129	72	393	64	393	PF02949.20	7tm_6	6.5e-36	3.6e-40
KoreaOr130	72	392	63	392	PF02949.20	7tm_6	1.1e-42	6e-47
KoreaOr131	59	390	58	391	PF02949.20	7tm_6	8.3e-36	4.6e-40
KoreaOr132	60	389	57	390	PF02949.20	7tm_6	3.8e-36	2.1e-40
KoreaOr133	81	389	72	389	PF02949.20	7tm_6	3.9e-44	2.2e-48
KoreaOr134	78	387	69	389	PF02949.20	7tm_6	4.6e-27	2.6e-31
WufuOr1	79	392	77	393	PF02949.20	7tm_6	6.8e-37	3.8e-41
WufuOr2	77	385	70	385	PF02949.20	7tm_6	7.7e-36	4.3e-40
WufuOr4	74	383	59	383	PF02949.20	7tm_6	1.1e-28	5.9e-33
WufuOr5	63	382	59	382	PF02949.20	7tm_6	9.6e-31	5.4e-35
WufuOr6	76	384	68	384	PF02949.20	7tm_6	9.7e-38	5.4e-42
WufuOr7	74	390	67	390	PF02949.20	7tm_6	1e-33	5.6e-38
WufuOr8	60	378	59	379	PF02949.20	7tm_6	7.7e-32	4.3e-36
WufuOr9	60	380	59	380	PF02949.20	7tm_6	6.3e-29	3.5e-33
WufuOr10	47	360	46	360	PF02949.20	7tm_6	9.6e-49	5.4e-53
WufuOr11	62	381	61	382	PF02949.20	7tm_6	8.8e-50	4.9e-54
WufuOr12	80	392	76	392	PF02949.20	7tm_6	3.7e-44	2e-48
WufuOr13	77	392	70	393	PF02949.20	7tm_6	2.5e-42	1.4e-46
WufuOr14	54	359	52	360	PF02949.20	7tm_6	3.5e-35	3.9e-39
WufuOr15	81	386	70	386	PF02949.20	7tm_6	3.3e-38	1.9e-42
WufuOr16	63	390	58	390	PF02949.20	7tm_6	2.7e-39	1.5e-43
WufuOr17	72	387	71	388	PF02949.20	7tm_6	7.3e-37	4.1e-41
WufuOr18	65	381	57	382	PF02949.20	7tm_6	2.4e-12	1.3e-16
WufuOr19	118	378	93	382	PF02949.20	7tm_6	1.9e-12	1.1e-16
WufuOr21	100	388	70	388	PF02949.20	7tm_6	5.3e-27	3e-31
WufuOr22	64	422	64	423	PF02949.20	7tm_6	2.3e-37	1.3e-41
WufuOr23	72	344	68	357	PF02949.20	7tm_6	7.5e-21	4.2e-25
WufuOr24	68	339	55	356	PF02949.20	7tm_6	7.8e-11	4.3e-15
WufuOr25	116	354	95	360	PF02949.20	7tm_6	2.2e-13	1.2e-17
WufuOr26	68	357	53	359	PF02949.20	7tm_6	5.8e-14	3.2e-18
WufuOr27	78	358	70	359	PF02949.20	7tm_6	8.8e-11	4.9e-15
WufuOr28	68	356	66	359	PF02949.20	7tm_6	1.5e-15	8.4e-20
WufuOr29	72	356	67	359	PF02949.20	7tm_6	5.8e-16	3.2e-20
WufuOr30	69	339	63	346	PF02949.20	7tm_6	2.7e-08	1.5e-12
WufuOr31	34	246	1	247	PF02949.20	7tm_6	8.6e-16	4.8e-20
WufuOr33	88	388	73	388	PF02949.20	7tm_6	2e-27	1.1e-31
WufuOr34	83	391	75	391	PF02949.20	7tm_6	1.1e-33	6e-38
WufuOr35	67	380	64	380	PF02949.20	7tm_6	3.5e-40	1.9e-44
WufuOr36	71	372	68	373	PF02949.20	7tm_6	2.4e-43	1.4e-47
WufuOr37	60	375	57	377	PF02949.20	7tm_6	9e-35	1e-38
WufuOr38	60	371	57	373	PF02949.20	7tm_6	3.9e-36	4.3e-40
WufuOr39	58	363	57	364	PF02949.20	7tm_6	2e-35	1.1e-39
WufuOr41	58	373	57	374	PF02949.20	7tm_6	3.4e-38	1.9e-42
WufuOr42	83	385	67	385	PF02949.20	7tm_6	5.2e-21	2.9e-25
WufuOr43	92	390	62	390	PF02949.20	7tm_6	1.5e-17	8.1e-22
WufuOr44	81	392	73	392	PF02949.20	7tm_6	1.9e-30	1.1e-34
WufuOr45	82	324	65	325	PF02949.20	7tm_6	5.5e-11	3.1e-15
WufuOr46	67	381	63	382	PF02949.20	7tm_6	4.3e-33	2.4e-37
WufuOr47	59	383	58	383	PF02949.20	7tm_6	2.7e-19	1.5e-23
WufuOr48	90	400	84	400	PF02949.20	7tm_6	2.2e-37	1.3e-41
WufuOr49	90	402	84	402	PF02949.20	7tm_6	1.1e-33	6.3e-38
WufuOr50	82	393	73	393	PF02949.20	7tm_6	4.7e-29	2.6e-33
WufuOr51	85	392	81	392	PF02949.20	7tm_6	3.1e-33	1.7e-37
WufuOr52	83	395	77	395	PF02949.20	7tm_6	2.7e-24	1.5e-28
WufuOr53	83	393	76	395	PF02949.20	7tm_6	1.8e-22	9.8e-27
WufuOr54	85	393	77	393	PF02949.20	7tm_6	6.1e-38	3.4e-42
WufuOr55	85	401	77	402	PF02949.20	7tm_6	4.2e-34	4.7e-38
WufuOr56	82	395	76	395	PF02949.20	7tm_6	1.5e-21	8.3e-26
WufuOr57	78	386	72	386	PF02949.20	7tm_6	1.5e-29	8.3e-34
WufuOr58	147	393	97	394	PF02949.20	7tm_6	1.8e-19	1e-23
WufuOr59	147	392	95	393	PF02949.20	7tm_6	1.5e-19	8.3e-24
WufuOr60	100	394	86	394	PF02949.20	7tm_6	1.4e-20	8e-25
WufuOr61	85	394	75	394	PF02949.20	7tm_6	1e-22	5.6e-27
WufuOr62	98	393	80	394	PF02949.20	7tm_6	9.8e-22	5.5e-26
WufuOr63	148	394	77	394	PF02949.20	7tm_6	2.5e-21	1.4e-25
WufuOr64	88	394	75	394	PF02949.20	7tm_6	3.7e-21	2e-25
WufuOr65	98	393	77	394	PF02949.20	7tm_6	2e-21	1.1e-25
WufuOr66	79	386	73	386	PF02949.20	7tm_6	4.2e-26	2.4e-30
WufuOr67	100	396	90	396	PF02949.20	7tm_6	2.9e-19	1.6e-23
WufuOr68	83	395	80	397	PF02949.20	7tm_6	3.8e-34	2.1e-38
WufuOr69	90	396	80	396	PF02949.20	7tm_6	4.2e-32	2.3e-36
WufuOr70	88	400	82	400	PF02949.20	7tm_6	9.5e-35	5.3e-39
WufuOr71	89	396	83	396	PF02949.20	7tm_6	1.7e-32	9.6e-37
WufuOr72	87	395	80	395	PF02949.20	7tm_6	2.6e-30	1.5e-34
WufuOr73	88	396	82	396	PF02949.20	7tm_6	2.8e-33	1.6e-37
WufuOr74	87	398	82	398	PF02949.20	7tm_6	1.1e-32	6.1e-37
WufuOr75	78	386	72	386	PF02949.20	7tm_6	1.7e-24	9.2e-29
WufuOr76	89	399	81	399	PF02949.20	7tm_6	1e-33	5.8e-38
WufuOr77	4	112	1	113	PF02949.20	7tm_6	5.5e-17	3.1e-21
WufuOr78	65	385	64	387	PF02949.20	7tm_6	7.4e-34	4.1e-38
WufuOr79	71	383	63	383	PF02949.20	7tm_6	1.1e-44	5.9e-49
WufuOr80	104	381	63	381	PF02949.20	7tm_6	1.9e-41	1.1e-45
WufuOr81	61	363	59	363	PF02949.20	7tm_6	4.2e-52	2.3e-56
WufuOr82	61	358	58	358	PF02949.20	7tm_6	3e-51	1.7e-55
WufuOr83	63	362	61	362	PF02949.20	7tm_6	3.3e-56	1.8e-60
WufuOr84	61	359	59	359	PF02949.20	7tm_6	1.5e-52	8.2e-57
WufuOr85	61	360	59	360	PF02949.20	7tm_6	9.3e-50	1e-53
WufuOr86	60	352	59	352	PF02949.20	7tm_6	3.6e-40	2e-44
WufuOr87	72	387	63	388	PF02949.20	7tm_6	6.9e-38	7.7e-42
WufuOr88	76	386	70	386	PF02949.20	7tm_6	5.5e-34	3.1e-38
WufuOr89	65	384	60	385	PF02949.20	7tm_6	3.4e-41	1.9e-45
WufuOr90	68	391	63	391	PF02949.20	7tm_6	5.7e-44	3.2e-48
WufuOr91	78	384	64	384	PF02949.20	7tm_6	6.9e-43	3.8e-47
WufuOr92	72	384	63	387	PF02949.20	7tm_6	1.2e-39	1.3e-43
WufuOr93	78	399	69	399	PF02949.20	7tm_6	3e-42	3.3e-46
WufuOr94	70	389	62	389	PF02949.20	7tm_6	1.8e-43	9.9e-48
WufuOr95	76	395	62	396	PF02949.20	7tm_6	5.5e-37	3e-41
WufuOr96	78	390	64	390	PF02949.20	7tm_6	3.2e-44	1.8e-48
WufuOr97	61	392	60	393	PF02949.20	7tm_6	1e-35	5.6e-40
WufuOr98	77	390	76	391	PF02949.20	7tm_6	1.2e-31	6.7e-36
WufuOr99	1	128	1	137	PF02949.20	7tm_6	4.4e-14	2.4e-18
WufuOr101	72	392	70	393	PF02949.20	7tm_6	1.4e-31	7.6e-36
WufuOr102	72	393	70	393	PF02949.20	7tm_6	1.3e-33	7e-38
WufuOr103	56	375	53	375	PF02949.20	7tm_6	7.8e-37	4.3e-41
WufuOr104	62	364	59	364	PF02949.20	7tm_6	1e-25	5.8e-30
WufuOr105	139	400	111	400	PF02949.20	7tm_6	5e-34	2.8e-38
WufuOr106	63	390	58	390	PF02949.20	7tm_6	2.7e-39	1.5e-43
WufuOr107	72	382	71	383	PF02949.20	7tm_6	2.4e-33	1.3e-37
WufuOr108	77	380	61	380	PF02949.20	7tm_6	1.3e-24	7.2e-29
WufuOr111	73	349	18	349	PF02949.20	7tm_6	6.8e-26	3.8e-30
WufuOr113	60	304	57	306	PF02949.20	7tm_6	9.6e-12	5.3e-16
WufuOr114	58	357	57	358	PF02949.20	7tm_6	2e-33	1.1e-37
WufuOr115	94	392	64	392	PF02949.20	7tm_6	2.3e-17	1.3e-21
WufuOr116	89	399	79	399	PF02949.20	7tm_6	4.8e-31	2.7e-35
WufuOr117	79	390	77	391	PF02949.20	7tm_6	8.6e-37	4.8e-41
WufuOr118	85	392	81	392	PF02949.20	7tm_6	3.1e-33	1.7e-37
WufuOr119	81	397	76	397	PF02949.20	7tm_6	1.2e-25	6.5e-30
WufuOr120	99	395	76	395	PF02949.20	7tm_6	4.3e-21	2.4e-25
WufuOr121	89	399	54	399	PF02949.20	7tm_6	4.3e-31	2.4e-35
WufuOr122	90	398	84	399	PF02949.20	7tm_6	2.3e-33	1.3e-37
WufuOr123	109	385	81	385	PF02949.20	7tm_6	1.1e-45	6.3e-50
WufuOr124	75	388	63	388	PF02949.20	7tm_6	4.4e-47	2.5e-51
WufuOr125	68	387	63	388	PF02949.20	7tm_6	2.7e-38	3e-42
WufuOr126	70	391	64	391	PF02949.20	7tm_6	2.4e-43	1.3e-47
WufuOr127	75	391	63	391	PF02949.20	7tm_6	4.4e-45	4.9e-49
WufuOr128	70	388	64	389	PF02949.20	7tm_6	1.5e-42	8.5e-47
WufuOr129	72	393	64	393	PF02949.20	7tm_6	1.5e-35	8.2e-40
WufuOr130	72	392	63	392	PF02949.20	7tm_6	8.1e-43	4.5e-47
WufuOr131	74	386	66	386	PF02949.20	7tm_6	3.4e-46	1.9e-50
WufuOr132	81	389	63	389	PF02949.20	7tm_6	1.9e-44	1.1e-48
WufuOr133	78	387	69	389	PF02949.20	7tm_6	3.1e-27	1.7e-31
WufuOr134	68	463	67	464	PF02949.20	7tm_6	9.5e-99	1.1e-102
BaishaOr1	79	392	77	393	PF02949.20	7tm_6	6.8e-37	3.8e-41
BaishaOr2	77	385	70	385	PF02949.20	7tm_6	7.6e-36	4.2e-40
BaishaOr4	60	379	57	379	PF02949.20	7tm_6	5e-37	2.8e-41
BaishaOr5	74	383	59	383	PF02949.20	7tm_6	1.1e-28	5.9e-33
BaishaOr6	63	382	59	382	PF02949.20	7tm_6	9.6e-31	5.4e-35
BaishaOr7	76	384	68	384	PF02949.20	7tm_6	9.7e-38	5.4e-42
BaishaOr8	74	390	67	390	PF02949.20	7tm_6	1e-33	5.6e-38
BaishaOr9	60	378	59	379	PF02949.20	7tm_6	7.7e-32	4.3e-36
BaishaOr10	60	380	59	380	PF02949.20	7tm_6	8.5e-29	4.7e-33
BaishaOr11	47	360	46	360	PF02949.20	7tm_6	1.7e-48	9.4e-53
BaishaOr12	62	381	61	382	PF02949.20	7tm_6	1.5e-50	8.3e-55
BaishaOr13	80	392	76	392	PF02949.20	7tm_6	3.7e-44	2e-48
BaishaOr14	77	392	72	393	PF02949.20	7tm_6	9.1e-42	5.1e-46
BaishaOr15	54	359	52	360	PF02949.20	7tm_6	4.2e-35	4.7e-39
BaishaOr16	81	386	70	386	PF02949.20	7tm_6	3.3e-38	1.9e-42
BaishaOr17	63	390	58	390	PF02949.20	7tm_6	2.7e-39	1.5e-43
BaishaOr18	72	387	71	388	PF02949.20	7tm_6	1.3e-36	7.1e-41
BaishaOr19	118	378	93	382	PF02949.20	7tm_6	1.9e-12	1.1e-16
BaishaOr22	83	380	48	381	PF02949.20	7tm_6	3.7e-10	2e-14
BaishaOr23	100	388	70	388	PF02949.20	7tm_6	3.1e-27	1.7e-31
BaishaOr24	64	422	64	423	PF02949.20	7tm_6	2.1e-37	1.2e-41
BaishaOr25	72	344	68	357	PF02949.20	7tm_6	1e-21	5.8e-26
BaishaOr26	68	339	55	356	PF02949.20	7tm_6	7.8e-11	4.3e-15
BaishaOr27	116	354	95	360	PF02949.20	7tm_6	2.2e-13	1.2e-17
BaishaOr28	68	357	53	359	PF02949.20	7tm_6	2.7e-14	1.5e-18
BaishaOr29	68	356	66	359	PF02949.20	7tm_6	1.5e-15	8.4e-20
BaishaOr30	72	356	67	359	PF02949.20	7tm_6	5.8e-16	3.2e-20
BaishaOr31	69	339	63	346	PF02949.20	7tm_6	2.7e-08	1.5e-12
BaishaOr32	34	246	1	247	PF02949.20	7tm_6	1.5e-15	8.4e-20
BaishaOr34	88	388	73	388	PF02949.20	7tm_6	3.9e-28	2.2e-32
BaishaOr35	83	391	75	391	PF02949.20	7tm_6	1.1e-33	6e-38
BaishaOr36	67	380	64	380	PF02949.20	7tm_6	3.5e-40	1.9e-44
BaishaOr37	71	372	68	373	PF02949.20	7tm_6	4.3e-44	2.4e-48
BaishaOr38	62	386	61	387	PF02949.20	7tm_6	3.7e-27	2.1e-31
BaishaOr39	60	375	57	377	PF02949.20	7tm_6	9e-35	1e-38
BaishaOr40	60	374	57	376	PF02949.20	7tm_6	1.4e-33	7.7e-38
BaishaOr41	60	364	57	365	PF02949.20	7tm_6	6e-27	3.4e-31
BaishaOr42	58	363	57	364	PF02949.20	7tm_6	2e-35	1.1e-39
BaishaOr44	58	373	57	374	PF02949.20	7tm_6	2.8e-38	1.6e-42
BaishaOr45	84	386	69	386	PF02949.20	7tm_6	8.4e-22	4.7e-26
BaishaOr46	81	392	73	392	PF02949.20	7tm_6	1.9e-31	1e-35
BaishaOr47	82	384	65	384	PF02949.20	7tm_6	2.2e-20	1.2e-24
BaishaOr48	67	381	63	382	PF02949.20	7tm_6	4.3e-33	2.4e-37
BaishaOr49	60	383	58	383	PF02949.20	7tm_6	6.8e-17	3.8e-21
BaishaOr50	90	400	84	400	PF02949.20	7tm_6	1.9e-37	1e-41
BaishaOr51	90	402	84	402	PF02949.20	7tm_6	1.1e-33	6.3e-38
BaishaOr52	82	393	73	393	PF02949.20	7tm_6	9e-33	5e-37
BaishaOr53	91	401	84	401	PF02949.20	7tm_6	4.6e-33	2.6e-37
BaishaOr54	82	393	73	393	PF02949.20	7tm_6	2.5e-29	1.4e-33
BaishaOr55	92	402	85	402	PF02949.20	7tm_6	1.4e-32	7.9e-37
BaishaOr56	85	392	81	392	PF02949.20	7tm_6	2.2e-33	1.2e-37
BaishaOr57	83	395	77	395	PF02949.20	7tm_6	2.7e-24	1.5e-28
BaishaOr58	83	393	76	395	PF02949.20	7tm_6	7.5e-23	4.2e-27
BaishaOr59	85	393	78	393	PF02949.20	7tm_6	1.1e-37	5.9e-42
BaishaOr60	84	392	76	392	PF02949.20	7tm_6	2.8e-34	1.6e-38
BaishaOr61	85	401	77	402	PF02949.20	7tm_6	4.2e-34	4.7e-38
BaishaOr62	98	393	76	393	PF02949.20	7tm_6	1.3e-22	7.1e-27
BaishaOr63	82	395	76	395	PF02949.20	7tm_6	4.1e-23	4.5e-27
BaishaOr64	78	386	72	386	PF02949.20	7tm_6	1.5e-29	8.3e-34
BaishaOr65	143	393	87	394	PF02949.20	7tm_6	8.6e-22	4.8e-26
BaishaOr66	141	392	85	393	PF02949.20	7tm_6	6.4e-20	3.6e-24
BaishaOr67	99	394	76	395	PF02949.20	7tm_6	2.1e-23	1.2e-27
BaishaOr68	85	393	75	394	PF02949.20	7tm_6	3.4e-24	1.9e-28
BaishaOr69	98	393	81	394	PF02949.20	7tm_6	8.9e-22	5e-26
BaishaOr70	94	394	77	394	PF02949.20	7tm_6	1.2e-21	6.4e-26
BaishaOr71	88	393	75	394	PF02949.20	7tm_6	1.3e-22	7.3e-27
BaishaOr72	88	394	75	394	PF02949.20	7tm_6	3.7e-21	2e-25
BaishaOr73	98	393	76	394	PF02949.20	7tm_6	2.4e-21	1.3e-25
BaishaOr74	79	386	73	386	PF02949.20	7tm_6	4.2e-26	2.4e-30
BaishaOr75	100	396	94	396	PF02949.20	7tm_6	6.3e-19	3.5e-23
BaishaOr76	83	395	80	397	PF02949.20	7tm_6	1.1e-34	6.1e-39
BaishaOr77	90	396	80	396	PF02949.20	7tm_6	3.4e-32	1.9e-36
BaishaOr78	88	400	82	400	PF02949.20	7tm_6	8.7e-36	4.8e-40
BaishaOr79	84	395	79	395	PF02949.20	7tm_6	7.5e-38	4.2e-42
BaishaOr80	89	395	83	395	PF02949.20	7tm_6	9.7e-32	5.4e-36
BaishaOr81	87	395	80	395	PF02949.20	7tm_6	6.3e-30	3.5e-34
BaishaOr82	88	396	82	396	PF02949.20	7tm_6	2.9e-33	1.6e-37
BaishaOr83	87	398	82	398	PF02949.20	7tm_6	1.1e-32	6.1e-37
BaishaOr84	80	386	72	386	PF02949.20	7tm_6	1.7e-23	9.3e-28
BaishaOr85	89	399	81	399	PF02949.20	7tm_6	6.4e-35	3.6e-39
BaishaOr86	4	112	1	113	PF02949.20	7tm_6	5.5e-17	3.1e-21
BaishaOr87	65	385	64	387	PF02949.20	7tm_6	8.4e-34	4.7e-38
BaishaOr88	71	383	63	383	PF02949.20	7tm_6	1.1e-44	6.1e-49
BaishaOr89	104	381	65	381	PF02949.20	7tm_6	7.7e-45	4.3e-49
BaishaOr90	105	381	65	381	PF02949.20	7tm_6	1.9e-41	1e-45
BaishaOr91	61	363	59	363	PF02949.20	7tm_6	4.2e-52	2.3e-56
BaishaOr92	61	358	58	358	PF02949.20	7tm_6	3e-51	1.7e-55
BaishaOr93	63	362	61	362	PF02949.20	7tm_6	3.3e-56	1.8e-60
BaishaOr94	61	359	59	359	PF02949.20	7tm_6	1.5e-52	8.2e-57
BaishaOr95	61	360	59	360	PF02949.20	7tm_6	9.3e-50	1e-53
BaishaOr96	60	352	59	352	PF02949.20	7tm_6	1.6e-40	9.2e-45
BaishaOr97	72	387	63	388	PF02949.20	7tm_6	6.9e-38	7.7e-42
BaishaOr98	63	388	60	389	PF02949.20	7tm_6	2.4e-41	1.3e-45
BaishaOr99	76	386	70	386	PF02949.20	7tm_6	7.3e-34	4.1e-38
BaishaOr100	74	392	63	392	PF02949.20	7tm_6	3.4e-41	1.9e-45
BaishaOr101	75	390	66	391	PF02949.20	7tm_6	6.9e-40	3.8e-44
BaishaOr102	68	391	63	391	PF02949.20	7tm_6	9.5e-43	5.3e-47
BaishaOr103	78	384	64	384	PF02949.20	7tm_6	6.9e-43	3.8e-47
BaishaOr104	72	384	63	387	PF02949.20	7tm_6	1.2e-39	1.3e-43
BaishaOr105	78	399	69	399	PF02949.20	7tm_6	3e-42	3.3e-46
BaishaOr106	70	389	62	389	PF02949.20	7tm_6	1.8e-43	9.9e-48
BaishaOr107	68	395	62	396	PF02949.20	7tm_6	3e-37	1.7e-41
BaishaOr108	78	391	68	391	PF02949.20	7tm_6	3.8e-44	4.3e-48
BaishaOr109	61	392	60	393	PF02949.20	7tm_6	8.5e-36	4.8e-40
BaishaOr110	17	222	5	223	PF02949.20	7tm_6	6.1e-22	3.4e-26
BaishaOr112	76	392	71	393	PF02949.20	7tm_6	1.5e-27	8.6e-32
BaishaOr113	72	392	70	393	PF02949.20	7tm_6	1.4e-31	7.6e-36
BaishaOr114	72	393	70	393	PF02949.20	7tm_6	4.9e-33	2.7e-37
BaishaOr115	56	375	53	375	PF02949.20	7tm_6	4.8e-37	2.7e-41
BaishaOr116	62	382	59	382	PF02949.20	7tm_6	1.2e-28	6.5e-33
BaishaOr117	137	400	77	400	PF02949.20	7tm_6	1.8e-33	1e-37
BaishaOr118	63	390	58	390	PF02949.20	7tm_6	2.7e-39	1.5e-43
BaishaOr119	72	382	71	383	PF02949.20	7tm_6	4.2e-33	2.3e-37
BaishaOr120	77	380	61	380	PF02949.20	7tm_6	1.3e-24	7.2e-29
BaishaOr122	176	273	175	274	PF02949.20	7tm_6	4.3e-07	2.4e-11
BaishaOr123	73	349	18	349	PF02949.20	7tm_6	4e-26	2.2e-30
BaishaOr125	78	358	70	359	PF02949.20	7tm_6	9.6e-12	5.4e-16
BaishaOr126	58	357	57	358	PF02949.20	7tm_6	2e-33	1.1e-37
BaishaOr127	89	399	79	399	PF02949.20	7tm_6	1.5e-30	8.3e-35
BaishaOr128	79	390	77	391	PF02949.20	7tm_6	8.6e-37	4.8e-41
BaishaOr129	91	397	76	397	PF02949.20	7tm_6	2.2e-25	1.2e-29
BaishaOr130	98	393	85	394	PF02949.20	7tm_6	2.7e-23	1.5e-27
BaishaOr131	94	394	77	394	PF02949.20	7tm_6	1.7e-21	9.5e-26
BaishaOr132	88	394	75	394	PF02949.20	7tm_6	3.7e-21	2e-25
BaishaOr133	88	400	82	400	PF02949.20	7tm_6	8.7e-36	4.8e-40
BaishaOr134	89	399	54	399	PF02949.20	7tm_6	4.3e-32	2.4e-36
BaishaOr135	90	398	84	399	PF02949.20	7tm_6	1.1e-33	6.1e-38
BaishaOr136	109	385	81	385	PF02949.20	7tm_6	9.8e-46	5.5e-50
BaishaOr137	104	381	63	381	PF02949.20	7tm_6	7.1e-45	4e-49
BaishaOr138	75	388	63	388	PF02949.20	7tm_6	3.5e-46	3.9e-50
BaishaOr139	68	387	63	388	PF02949.20	7tm_6	2.7e-38	3e-42
BaishaOr140	70	391	64	391	PF02949.20	7tm_6	3.1e-43	1.7e-47
BaishaOr141	75	391	65	391	PF02949.20	7tm_6	1.1e-42	6e-47
BaishaOr142	65	383	60	384	PF02949.20	7tm_6	3.9e-42	2.2e-46
BaishaOr143	70	388	64	389	PF02949.20	7tm_6	3.4e-42	1.9e-46
BaishaOr144	72	378	58	378	PF02949.20	7tm_6	6e-43	3.4e-47
BaishaOr145	72	393	64	393	PF02949.20	7tm_6	1.5e-35	8.2e-40
BaishaOr146	72	392	63	392	PF02949.20	7tm_6	5e-42	2.8e-46
BaishaOr147	74	386	65	386	PF02949.20	7tm_6	1.8e-46	1e-50
BaishaOr148	69	393	62	394	PF02949.20	7tm_6	2.6e-37	1.4e-41
BaishaOr149	68	394	62	395	PF02949.20	7tm_6	4.9e-38	2.7e-42
BaishaOr150	81	389	63	389	PF02949.20	7tm_6	3.7e-44	2.1e-48
BaishaOr151	68	463	67	464	PF02949.20	7tm_6	9.5e-99	1.1e-102
AbaOr1	79	392	77	393	PF02949.20	7tm_6	7.2e-37	4e-41
AbaOr2	77	385	70	385	PF02949.20	7tm_6	4.7e-36	2.6e-40
AbaOr4	70	342	68	343	PF02949.20	7tm_6	1.6e-18	8.9e-23
AbaOr5	60	379	57	379	PF02949.20	7tm_6	4.6e-37	2.6e-41
AbaOr6	74	383	59	383	PF02949.20	7tm_6	1.1e-28	5.9e-33
AbaOr7	63	382	59	382	PF02949.20	7tm_6	9.6e-31	5.4e-35
AbaOr8	76	384	68	384	PF02949.20	7tm_6	9.7e-38	5.4e-42
AbaOr9	74	390	67	390	PF02949.20	7tm_6	3.5e-33	2e-37
AbaOr10	60	378	59	379	PF02949.20	7tm_6	9.1e-32	5.1e-36
AbaOr11	60	380	59	380	PF02949.20	7tm_6	2.1e-28	1.2e-32
AbaOr12	47	360	46	360	PF02949.20	7tm_6	9.6e-49	5.4e-53
AbaOr13	80	392	76	392	PF02949.20	7tm_6	3.7e-44	2e-48
AbaOr14	77	391	72	392	PF02949.20	7tm_6	4.2e-41	2.3e-45
AbaOr15	54	359	52	360	PF02949.20	7tm_6	3.5e-35	3.9e-39
AbaOr16	136	397	110	397	PF02949.20	7tm_6	5.5e-34	3.1e-38
AbaOr17	81	386	70	386	PF02949.20	7tm_6	2.6e-38	1.5e-42
AbaOr18	63	390	58	390	PF02949.20	7tm_6	2.7e-39	1.5e-43
AbaOr19	118	378	93	382	PF02949.20	7tm_6	1.9e-12	1.1e-16
AbaOr20	100	388	70	388	PF02949.20	7tm_6	5.3e-27	3e-31
AbaOr21	64	422	64	423	PF02949.20	7tm_6	2.3e-37	1.3e-41
AbaOr22	72	344	68	357	PF02949.20	7tm_6	1e-21	5.8e-26
AbaOr23	115	359	67	360	PF02949.20	7tm_6	3.9e-11	2.2e-15
AbaOr24	68	357	53	359	PF02949.20	7tm_6	5.8e-14	3.2e-18
AbaOr25	78	358	70	359	PF02949.20	7tm_6	8.8e-11	4.9e-15
AbaOr26	68	356	66	359	PF02949.20	7tm_6	1.5e-15	8.4e-20
AbaOr27	72	356	67	359	PF02949.20	7tm_6	5.8e-16	3.2e-20
AbaOr28	69	339	63	346	PF02949.20	7tm_6	2.7e-08	1.5e-12
AbaOr30	88	388	73	388	PF02949.20	7tm_6	2e-27	1.1e-31
AbaOr31	83	391	75	391	PF02949.20	7tm_6	1.1e-33	6e-38
AbaOr32	67	380	64	380	PF02949.20	7tm_6	3.5e-40	1.9e-44
AbaOr33	62	386	61	387	PF02949.20	7tm_6	3.7e-27	2.1e-31
AbaOr34	60	375	57	377	PF02949.20	7tm_6	9e-35	1e-38
AbaOr35	60	371	57	373	PF02949.20	7tm_6	3.9e-36	4.3e-40
AbaOr36	60	364	57	365	PF02949.20	7tm_6	6e-27	3.4e-31
AbaOr38	58	373	57	374	PF02949.20	7tm_6	3.4e-38	1.9e-42
AbaOr39	83	387	68	387	PF02949.20	7tm_6	1.6e-16	8.7e-21
AbaOr40	81	392	74	392	PF02949.20	7tm_6	1.6e-31	9.2e-36
AbaOr41	82	384	65	384	PF02949.20	7tm_6	4.8e-20	2.7e-24
AbaOr42	90	400	84	400	PF02949.20	7tm_6	1.9e-37	1e-41
AbaOr43	82	393	73	393	PF02949.20	7tm_6	7e-33	3.9e-37
AbaOr44	91	401	84	401	PF02949.20	7tm_6	4.6e-33	2.6e-37
AbaOr45	82	393	73	393	PF02949.20	7tm_6	2.5e-29	1.4e-33
AbaOr46	83	393	76	395	PF02949.20	7tm_6	7.5e-23	4.2e-27
AbaOr47	85	393	78	393	PF02949.20	7tm_6	1e-37	5.6e-42
AbaOr48	85	401	77	402	PF02949.20	7tm_6	4.2e-34	4.7e-38
AbaOr49	78	386	72	386	PF02949.20	7tm_6	1.5e-29	8.3e-34
AbaOr50	143	393	87	394	PF02949.20	7tm_6	6.5e-22	3.6e-26
AbaOr51	85	393	75	394	PF02949.20	7tm_6	1.9e-24	1.1e-28
AbaOr52	98	393	80	394	PF02949.20	7tm_6	9.8e-22	5.5e-26
AbaOr53	147	393	96	393	PF02949.20	7tm_6	1.6e-20	9.1e-25
AbaOr54	98	393	77	394	PF02949.20	7tm_6	1.8e-22	1e-26
AbaOr55	79	386	73	386	PF02949.20	7tm_6	4.2e-26	2.4e-30
AbaOr56	100	396	95	396	PF02949.20	7tm_6	7.3e-19	4.1e-23
AbaOr57	83	395	80	397	PF02949.20	7tm_6	1.2e-34	6.8e-39
AbaOr58	84	395	79	395	PF02949.20	7tm_6	7.5e-38	4.2e-42
AbaOr59	89	396	83	396	PF02949.20	7tm_6	1.7e-32	9.6e-37
AbaOr60	87	395	80	395	PF02949.20	7tm_6	6.3e-30	3.5e-34
AbaOr61	87	398	82	398	PF02949.20	7tm_6	1.1e-32	6.1e-37
AbaOr62	89	399	81	399	PF02949.20	7tm_6	6.4e-35	3.6e-39
AbaOr63	4	112	1	113	PF02949.20	7tm_6	5.5e-17	3.1e-21
AbaOr64	65	385	64	387	PF02949.20	7tm_6	8.4e-34	4.7e-38
AbaOr65	71	383	63	383	PF02949.20	7tm_6	1.1e-44	6.1e-49
AbaOr66	104	381	63	381	PF02949.20	7tm_6	6.6e-45	3.7e-49
AbaOr67	105	381	65	381	PF02949.20	7tm_6	1.9e-41	1e-45
AbaOr68	72	387	63	388	PF02949.20	7tm_6	6.9e-38	7.7e-42
AbaOr69	36	349	31	349	PF02949.20	7tm_6	3.2e-40	3.5e-44
AbaOr70	76	386	70	386	PF02949.20	7tm_6	8e-34	4.5e-38
AbaOr71	74	392	63	392	PF02949.20	7tm_6	2.4e-41	1.3e-45
AbaOr72	75	390	66	391	PF02949.20	7tm_6	6.9e-40	3.8e-44
AbaOr73	68	391	63	391	PF02949.20	7tm_6	2.8e-43	1.6e-47
AbaOr74	78	384	64	384	PF02949.20	7tm_6	6.9e-43	3.8e-47
AbaOr75	72	384	63	387	PF02949.20	7tm_6	2.7e-39	3e-43
AbaOr76	78	399	69	399	PF02949.20	7tm_6	3e-42	3.3e-46
AbaOr77	70	389	62	389	PF02949.20	7tm_6	1.2e-43	6.8e-48
AbaOr78	68	395	62	396	PF02949.20	7tm_6	3e-37	1.7e-41
AbaOr79	69	398	62	399	PF02949.20	7tm_6	6.3e-33	3.5e-37
AbaOr80	78	391	68	391	PF02949.20	7tm_6	3.4e-44	1.9e-48
AbaOr81	61	392	60	393	PF02949.20	7tm_6	8.5e-36	4.8e-40
AbaOr82	77	390	76	391	PF02949.20	7tm_6	1.6e-32	8.7e-37
AbaOr83	13	222	2	223	PF02949.20	7tm_6	9.4e-23	5.2e-27
AbaOr85	76	392	71	393	PF02949.20	7tm_6	2.6e-27	1.5e-31
AbaOr86	72	392	70	393	PF02949.20	7tm_6	8.7e-32	4.9e-36
AbaOr87	72	393	70	393	PF02949.20	7tm_6	1.3e-33	7e-38
AbaOr88	62	382	59	382	PF02949.20	7tm_6	1.8e-28	9.8e-33
AbaOr89	62	381	61	382	PF02949.20	7tm_6	7.1e-50	4e-54
AbaOr90	63	390	58	390	PF02949.20	7tm_6	2.7e-39	1.5e-43
AbaOr91	77	380	61	380	PF02949.20	7tm_6	1.3e-24	7.2e-29
AbaOr92	78	349	22	349	PF02949.20	7tm_6	6.5e-26	3.6e-30
AbaOr95	71	372	68	373	PF02949.20	7tm_6	2.5e-43	1.4e-47
AbaOr96	58	357	57	358	PF02949.20	7tm_6	2e-33	1.1e-37
AbaOr97	83	393	76	393	PF02949.20	7tm_6	1.3e-32	7.3e-37
AbaOr98	85	392	81	392	PF02949.20	7tm_6	2.2e-33	1.2e-37
AbaOr99	89	399	79	399	PF02949.20	7tm_6	4.8e-31	2.7e-35
AbaOr100	79	390	77	391	PF02949.20	7tm_6	8.6e-37	4.8e-41
AbaOr101	84	392	77	392	PF02949.20	7tm_6	2.1e-34	1.2e-38
AbaOr102	91	397	76	397	PF02949.20	7tm_6	2.1e-25	1.2e-29
AbaOr103	98	393	76	393	PF02949.20	7tm_6	9.3e-23	5.2e-27
AbaOr104	82	395	76	395	PF02949.20	7tm_6	1.9e-23	1.1e-27
AbaOr105	100	392	75	393	PF02949.20	7tm_6	1.4e-20	7.6e-25
AbaOr106	98	393	85	394	PF02949.20	7tm_6	2.7e-23	1.5e-27
AbaOr107	88	400	82	400	PF02949.20	7tm_6	8.7e-36	4.8e-40
AbaOr108	88	396	82	396	PF02949.20	7tm_6	2.9e-33	1.6e-37
AbaOr109	89	399	83	399	PF02949.20	7tm_6	3.9e-33	2.2e-37
AbaOr110	90	398	84	399	PF02949.20	7tm_6	2.3e-33	1.3e-37
AbaOr111	104	381	63	381	PF02949.20	7tm_6	7.1e-45	4e-49
AbaOr112	75	388	66	388	PF02949.20	7tm_6	1.4e-46	8e-51
AbaOr113	68	387	63	388	PF02949.20	7tm_6	2.7e-38	3e-42
AbaOr114	70	391	64	391	PF02949.20	7tm_6	3.1e-43	1.8e-47
AbaOr115	75	391	65	391	PF02949.20	7tm_6	1.1e-42	6e-47
AbaOr116	72	378	58	378	PF02949.20	7tm_6	6e-43	3.4e-47
AbaOr117	72	393	64	393	PF02949.20	7tm_6	7e-36	3.9e-40
AbaOr118	72	392	63	392	PF02949.20	7tm_6	8.1e-43	4.5e-47
AbaOr119	69	393	62	394	PF02949.20	7tm_6	2.6e-37	1.4e-41
AbaOr120	81	389	63	389	PF02949.20	7tm_6	3.7e-44	2.1e-48
AbaOr121	78	387	69	389	PF02949.20	7tm_6	1.3e-27	7.4e-32
AbaOr122	70	457	69	458	PF02949.20	7tm_6	4.9e-99	5.5e-103

## Sheet: TableS8
Table S8.Gustatory receptor in different Apis cerana strains.
seq id	alignment start	alignment end	envelope start	envelope end	hmm acc	hmm name	Individual E-value	Conditional E-value
AbaGus1	11	169	2	171	PF08395.12	7tm_7	4.3e-23	2.4e-27
AbaGus2	23	440	22	443	PF08395.12	7tm_7	1.5e-38	1.7e-42
AbaGus2	352	447	273	449	PF06151.13	Trehalose_recp	9e-06	1e-09
AbaGus3	58	215	5	217	PF08395.12	7tm_7	1.2e-22	6.6e-27
AbaGus4	61	414	59	417	PF08395.12	7tm_7	1.1e-33	6e-38
AbaGus5	54	451	20	459	PF06151.13	Trehalose_recp	1.3e-112	1.5e-116
AbaGus5	63	445	62	448	PF08395.12	7tm_7	3e-15	3.4e-19
AbaGus6	70	469	48	470	PF06151.13	Trehalose_recp	5.5e-94	6.2e-98
AbaGus6	83	467	82	468	PF08395.12	7tm_7	6e-21	6.7e-25
AbaGus7	9	358	7	359	PF08395.12	7tm_7	5.4e-17	3e-21
AbaGus8	9	358	7	359	PF08395.12	7tm_7	5.4e-17	3e-21
AbaGus9	10	60	8	62	PF08395.12	7tm_7	3.1e-19	3.5e-23
AbaGus9	12	67	7	72	PF06151.13	Trehalose_recp	9.2e-06	1e-09
AbaGus10	19	422	15	424	PF08395.12	7tm_7	8.2e-35	4.6e-39
AbaGus11	13	381	11	383	PF08395.12	7tm_7	2e-23	1.1e-27
KoreaGus1	23	440	22	443	PF08395.12	7tm_7	1.5e-38	1.7e-42
KoreaGus1	352	447	273	449	PF06151.13	Trehalose_recp	9e-06	1e-09
KoreaGus2	2	107	1	110	PF08395.12	7tm_7	1.1e-10	6.1e-15
KoreaGus3	2	107	1	110	PF08395.12	7tm_7	1.1e-10	6.1e-15
KoreaGus4	19	422	15	424	PF08395.12	7tm_7	8.2e-35	4.6e-39
KoreaGus5	10	60	8	62	PF08395.12	7tm_7	3.1e-19	3.5e-23
KoreaGus5	12	67	7	72	PF06151.13	Trehalose_recp	9.2e-06	1e-09
KoreaGus6	58	161	3	169	PF08395.12	7tm_7	7e-07	3.9e-11
KoreaGus7	9	360	7	361	PF08395.12	7tm_7	5.3e-14	3e-18
KoreaGus8	61	406	59	408	PF08395.12	7tm_7	2.3e-27	1.3e-31
KoreaGus9	70	467	36	475	PF06151.13	Trehalose_recp	1.5e-112	1.7e-116
KoreaGus9	79	461	78	464	PF08395.12	7tm_7	3.4e-15	3.8e-19
KoreaGus10	37	381	12	383	PF08395.12	7tm_7	2.7e-23	1.5e-27
KoreaGus11	216	314	212	317	PF08395.12	7tm_7	3.9e-10	2.2e-14
KoreaGus12	70	146	51	151	PF06151.13	Trehalose_recp	4.5e-11	5.1e-15
KoreaGus12	143	358	137	359	PF06151.13	Trehalose_recp	1.3e-64	1.5e-68
KoreaGus12	182	356	169	357	PF08395.12	7tm_7	1.6e-16	1.8e-20
KoreaGus15	56	458	55	460	PF01094.28	ANF_receptor	7.4e-85	1.2e-88
KoreaGus15	579	815	579	815	PF00003.22	7tm_3	1.1e-62	1.8e-66
WufuGus1	13	381	11	383	PF08395.12	7tm_7	2.2e-23	1.2e-27
WufuGus2	23	440	22	443	PF08395.12	7tm_7	1.5e-38	1.7e-42
WufuGus2	352	447	273	449	PF06151.13	Trehalose_recp	9e-06	1e-09
WufuGus3	61	406	59	408	PF08395.12	7tm_7	4.3e-27	2.4e-31
WufuGus4	399	690	398	690	PF00001.21	7tm_1	7.1e-48	7.9e-52
WufuGus4	391	515	389	524	PF10328.9	7TM_GPCR_Srx	1.1e-07	1.2e-11
WufuGus5	19	397	15	399	PF08395.12	7tm_7	2.3e-43	2.6e-47
WufuGus5	242	404	203	409	PF06151.13	Trehalose_recp	2.1e-05	2.4e-09
WufuGus6	10	60	8	62	PF08395.12	7tm_7	3.1e-19	3.5e-23
WufuGus6	12	67	7	72	PF06151.13	Trehalose_recp	9.2e-06	1e-09
WufuGus7	70	146	51	151	PF06151.13	Trehalose_recp	4.5e-11	5.1e-15
WufuGus7	143	358	137	359	PF06151.13	Trehalose_recp	1.3e-64	1.5e-68
WufuGus7	182	356	169	357	PF08395.12	7tm_7	1.6e-16	1.8e-20
WufuGus8	70	467	36	475	PF06151.13	Trehalose_recp	1.5e-112	1.7e-116
WufuGus8	79	461	78	464	PF08395.12	7tm_7	3.4e-15	3.8e-19
WufuGus9	11	169	2	171	PF08395.12	7tm_7	4.3e-23	2.4e-27
WufuGus10	58	215	5	217	PF08395.12	7tm_7	1.2e-22	6.6e-27
WufuGus11	18	380	15	383	PF08395.12	7tm_7	2.5e-24	1.4e-28
WufuGus12	18	380	15	383	PF08395.12	7tm_7	2.5e-24	1.4e-28
WufuGus17	579	815	579	815	PF00003.22	7tm_3	1.1e-62	1.8e-66
BaishaGus1	10	60	8	62	PF08395.12	7tm_7	3.1e-19	3.5e-23
BaishaGus1	12	67	7	72	PF06151.13	Trehalose_recp	9.2e-06	1e-09
BaishaGus3	13	398	11	401	PF08395.12	7tm_7	3.4e-31	1.9e-35
BaishaGus5	58	215	5	217	PF08395.12	7tm_7	1.2e-22	6.6e-27
BaishaGus7	18	380	15	383	PF08395.12	7tm_7	2.5e-24	1.4e-28
BaishaGus8	18	380	15	383	PF08395.12	7tm_7	2.5e-24	1.4e-28
BaishaGus11	11	169	2	171	PF08395.12	7tm_7	4.3e-23	2.4e-27
BaishaGus13	70	467	36	475	PF06151.13	Trehalose_recp	1.5e-112	1.7e-116
BaishaGus13	79	461	78	464	PF08395.12	7tm_7	3.4e-15	3.8e-19
BaishaGus14	70	469	48	470	PF06151.13	Trehalose_recp	5.5e-94	6.2e-98
BaishaGus14	83	467	82	468	PF08395.12	7tm_7	6e-21	6.7e-25
BaishaGus16	399	690	398	690	PF00001.21	7tm_1	7.1e-48	7.9e-52
BaishaGus16	391	515	389	524	PF10328.9	7TM_GPCR_Srx	1.1e-07	1.2e-11
BaishaGus17	61	406	59	408	PF08395.12	7tm_7	4.3e-27	2.4e-31
BaishaGus18	23	440	22	443	PF08395.12	7tm_7	1.5e-38	1.7e-42
BaishaGus18	352	447	273	449	PF06151.13	Trehalose_recp	9e-06	1e-09

## Sheet: TableS9
Table S9.Immune relate protein in different Apis cerana strains, the red highlight shows the ten immune-related pathways not reported previously.
Aba
ID	K0	product	Pathway
AbaImmune1	K05765	cofilin	Fc gamma R-mediated phagocytosis
AbaImmune2	K07369	mucosa-associated lymphoid tissue lymphoma translocation protein 1 EC:3.4.22.-	B cell receptor signaling pathway	T cell receptor signaling pathway	C-type lectin receptor signaling pathway
AbaImmune3	K07827	GTPase Kras	Chemokine signaling pathway	Fc epsilon RI signaling pathway	B cell receptor signaling pathway	IL-17 signaling pathway	T cell receptor signaling pathway	Natural killer cell mediated cytotoxicity	C-type lectin receptor signaling pathway
AbaImmune4	K07209	inhibitor of nuclear factor kappa-B kinase subunit beta [EC:2.7.11.1]0	Chemokine signaling pathway	B cell receptor signaling pathway	Th17 cell differentiation	Th1 and Th2 cell differentiation	T cell receptor signaling pathway	C-type lectin receptor signaling pathway	Cytosolic DNA-sensing pathway	RIG-I-like receptor signaling pathway	NOD-like receptor signaling pathway	Toll-like receptor signaling pathway	Toll and Imd signaling pathway
AbaImmune5	K05858	phosphatidylinositol phospholipase C beta [EC:3.1.4.11]	Chemokine signaling pathway	NOD-like receptor signaling pathway	Neutrophil extracellular trap formation	Platelet activation
AbaImmune6	K07532	Rho guanine nucleotide exchange factor 12	C-type lectin receptor signaling pathway
AbaImmune7	K04718	sphingosine kinase [EC:2.7.1.91]	Fc gamma R-mediated phagocytosis
AbaImmune8	K01115	phospholipase D1/2 [EC:3.1.4.4]	Fc gamma R-mediated phagocytosis
AbaImmune9	K08064	nuclear transcription factor Y alpha	Antigen processing and presentation
AbaImmune10	K11224	signal transducer and activator of transcription 5B	Chemokine signaling pathway	Th17 cell differentiation	Th1 and Th2 cell differentiation
AbaImmune11	K04501	mothers against decapentaplegic homolog 4	Th17 cell differentiation
AbaImmune13	K03283	heat shock 70kDa protein 1/2/6/8	Antigen processing and presentation
AbaImmune14	K04430	mitogen-activated protein kinase kinase 4 [EC:2.7.12.2]	Fc epsilon RI signaling pathway	Toll-like receptor signaling pathway
AbaImmune15	K04403	TAK1-binding protein 1	NOD-like receptor signaling pathway	Toll-like receptor signaling pathway
AbaImmune16	K08291	G protein-coupled receptor kinase [[EC:2.7.11.1]6]	Chemokine signaling pathway
AbaImmune17	K04008	CD59 antigen	Complement and coagulation cascades	Hematopoietic cell lineage
AbaImmune18	K05700	vinculin	Leukocyte transendothelial migration
AbaImmune19	K06508	CD81 antigen	B cell receptor signaling pathway
AbaImmune20	K12890	splicing factor arginine/serine-rich 1	IL-17 signaling pathway
AbaImmune21	K00863	triose/dihydroxyacetone kinase / FAD-AMP lyase (cyclizing) [[EC:2.7.1.28 2.7.1.29 4.6.1.15]]	RIG-I-like receptor signaling pathway
AbaImmune22	K01365	cathepsin L EC:3.4.22.15	Antigen processing and presentation	RIG-I-like receptor signaling pathway
AbaImmune23	K07293	tyrosine-protein phosphatase non-receptor type 11 [EC:3.1.3.48]	Leukocyte transendothelial migration	Natural killer cell mediated cytotoxicity	C-type lectin receptor signaling pathway
AbaImmune24	K09565	peptidyl-prolyl isomerase F (cyclophilin D) [EC:5.2.1.8]	Neutrophil extracellular trap formation
AbaImmune25	K03020	DNA-directed RNA polymerases I and III subunit RPAC2	Cytosolic DNA-sensing pathway
AbaImmune26	K08054	calnexin	Antigen processing and presentation
AbaImmune27	K03019	DNA-directed RNA polymerase III subunit RPC11	Cytosolic DNA-sensing pathway
AbaImmune28	K07830	Ras-related protein R-Ras2	C-type lectin receptor signaling pathway
AbaImmune29	K00910	beta-adrenergic-receptor kinase [[EC:2.7.11.1]5]	Chemokine signaling pathway
AbaImmune30	K08045	adenylate cyclase 5 [EC:4.6.1.1]	Chemokine signaling pathway	Platelet activation
AbaImmune31	K09487	heat shock protein 90kDa beta	IL-17 signaling pathway
AbaImmune32	K08337	ubiquitin-like modifier-activating enzyme ATG7	Neutrophil extracellular trap formation
AbaImmune33	K11404	histone deacetylase 3 [EC:3.5.1.98]	Neutrophil extracellular trap formation
AbaImmune34	K04441	p38 MAP kinase [EC:2.7.11.24]	Leukocyte transendothelial migration	Fc epsilon RI signaling pathway	IL-17 signaling pathway	Th17 cell differentiation	Th1 and Th2 cell differentiation	T cell receptor signaling pathway	C-type lectin receptor signaling pathway	RIG-I-like receptor signaling pathway	NOD-like receptor signaling pathway	Toll-like receptor signaling pathway	Toll and Imd signaling pathway	Neutrophil extracellular trap formation	Platelet activation
AbaImmune35	K09093	aryl hydrocarbon receptor	Th17 cell differentiation
AbaImmune36	K12654	transmembrane protein 173	Cytosolic DNA-sensing pathway	RIG-I-like receptor signaling pathway	NOD-like receptor signaling pathway
AbaImmune37	K08057	calreticulin	Antigen processing and presentation
AbaImmune38	K08336	ubiquitin-like protein ATG12	RIG-I-like receptor signaling pathway	NOD-like receptor signaling pathway
AbaImmune39	K04404	TAK1-binding protein 2	IL-17 signaling pathway	NOD-like receptor signaling pathway	Toll-like receptor signaling pathway	Toll and Imd signaling pathway
AbaImmune40	K08341	GABA(A) receptor-associated protein	NOD-like receptor signaling pathway
AbaImmune41	K00889	1-phosphatidylinositol-4-phosphate 5-kinase [EC:2.7.1.68]	Fc gamma R-mediated phagocytosis
AbaImmune42	K04536	guanine nucleotide-binding protein G(I)/G(S)/G(T) subunit beta-1	Chemokine signaling pathway
AbaImmune43	K03014	DNA-directed RNA polymerases I, II, and III subunit RPABC2	Cytosolic DNA-sensing pathway
AbaImmune44	K01116	phosphatidylinositol phospholipase C,gamma-1 [EC:3.1.4.11]	Chemokine signaling pathway	Leukocyte transendothelial migration	Fc gamma R-mediated phagocytosis	Fc epsilon RI signaling pathway	Th17 cell differentiation	Th1 and Th2 cell differentiation	T cell receptor signaling pathway	Natural killer cell mediated cytotoxicity	Neutrophil extracellular trap formation
AbaImmune45	K04364	growth factor receptor-bound protein 2	Chemokine signaling pathway	Fc epsilon RI signaling pathway	B cell receptor signaling pathway	T cell receptor signaling pathway	Natural killer cell mediated cytotoxicity
AbaImmune46	K04438	C-crk adapter molecule crk	Chemokine signaling pathway	Fc gamma R-mediated phagocytosis
AbaImmune47	K12655	OTU domain-containing protein 5 [EC:3.4.19.12]	RIG-I-like receptor signaling pathway
AbaImmune48	K04547	guanine nucleotide-binding protein G(I)/G(S)/G(O) subunit gamma-13	Chemokine signaling pathway
AbaImmune49	K14721	DNA-directed RNA polymerase III subunit RPC5	Cytosolic DNA-sensing pathway
AbaImmune50	K02580	nuclear factor NF-kappa-B p105 subunit	Chemokine signaling pathway	B cell receptor signaling pathway	IL-17 signaling pathway	Th17 cell differentiation	Th1 and Th2 cell differentiation	T cell receptor signaling pathway	C-type lectin receptor signaling pathway	Cytosolic DNA-sensing pathway	RIG-I-like receptor signaling pathway	NOD-like receptor signaling pathway	Toll-like receptor signaling pathway	Toll and Imd signaling pathway	Neutrophil extracellular trap formation
AbaImmune51	K12076	disks large protein 1	T cell receptor signaling pathway
AbaImmune52	K12795	suppressor of G2 allele of SKP1	NOD-like receptor signaling pathway
AbaImmune53	K04730	interleukin-1 receptor-associated kinase 1 [EC:2.7.11.1]	Toll-like receptor signaling pathway	Toll and Imd signaling pathway
AbaImmune54	K15040	voltage-dependent anion channel protein 2	NOD-like receptor signaling pathway	Neutrophil extracellular trap formation
AbaImmune55	K02183	calmodulin	C-type lectin receptor signaling pathway
AbaImmune56	K08059	interferon gamma-inducible protein 30	Antigen processing and presentation
AbaImmune57	K03027	DNA-directed RNA polymerases I and III subunit RPAC1	Cytosolic DNA-sensing pathway
AbaImmune58	K06630	14-3-3 protein epsilon	NOD-like receptor signaling pathway
AbaImmune59	K04353	Ras-related protein Rap-1A	Chemokine signaling pathway	Leukocyte transendothelial migration	Platelet activation
AbaImmune60	K05743	LIM domain kinase 1 [EC:2.7.11.1]	Fc gamma R-mediated phagocytosis
AbaImmune61	K08059	interferon gamma-inducible protein 30	Antigen processing and presentation
AbaImmune62	K04688	ribosomal protein S6 kinase beta [EC:2.7.11.1]	Fc gamma R-mediated phagocytosis
AbaImmune63	K11254	histone H4	Neutrophil extracellular trap formation
AbaImmune64	K11252	histone H2B	Neutrophil extracellular trap formation
AbaImmune65	K05692	actin beta/gamma 1	Intestinal immune network for IgA production	Leukocyte transendothelial migration	Neutrophil extracellular trap formation	Platelet activation
AbaImmune66	K05863	solute carrier family 25 (mitochondrial adenine nucleotide translocator),member 4/5/6/31	Neutrophil extracellular trap formation
AbaImmune67	K11140	aminopeptidase N [EC:3.4.11.2]	Hematopoietic cell lineage
AbaImmune68	K11140	aminopeptidase N [EC:3.4.11.2]	Hematopoietic cell lineage
AbaImmune69	K11140	aminopeptidase N [EC:3.4.11.2]	Hematopoietic cell lineage
AbaImmune70	K03022	DNA-directed RNA polymerase III subunit RPC8	Cytosolic DNA-sensing pathway
AbaImmune71	K05410	TANK-binding kinase 1 [EC:2.7.11.10]	IL-17 signaling pathway	Cytosolic DNA-sensing pathway	RIG-I-like receptor signaling pathway	NOD-like receptor signaling pathway	Toll-like receptor signaling pathway
AbaImmune72	K08065	nuclear transcription Y subunit beta	Antigen processing and presentation
AbaImmune73	K04079	molecular chaperone HtpG	IL-17 signaling pathway	Th17 cell differentiation	Antigen processing and presentation	NOD-like receptor signaling pathway
AbaImmune74	K04634	guanine nucleotide-binding protein G(q) subunit alpha	Chemokine signaling pathway	Platelet activation
AbaImmune75	K12562	amphiphysin	Fc gamma R-mediated phagocytosis
AbaImmune76	K11140	aminopeptidase N [EC:3.4.11.2]	Hematopoietic cell lineage
AbaImmune77	K09408	forkhead box protein O3	Chemokine signaling pathway
AbaImmune78	K05758	actin related protein 2/3 complex,subunit 2	Fc gamma R-mediated phagocytosis
AbaImmune79	K05704	tyrosine-protein kinase Src [EC:2.7.10.2]	Chemokine signaling pathway	C-type lectin receptor signaling pathway	Neutrophil extracellular trap formation	Platelet activation
AbaImmune80	K02373	FAS-associated death domain protein	IL-17 signaling pathway		NOD-like receptor signaling pathway	Toll-like receptor signaling pathway	Toll and Imd signaling pathway
AbaImmune81	K20858	calcium uniporter protein mitochondrial	RIG-I-like receptor signaling pathway
AbaImmune82	K08048	adenylate cyclase 8 [EC:4.6.1.1]	NOD-like receptor signaling pathway	Platelet activation
AbaImmune83	K03026	DNA-directed RNA polymerase III subunit RPC4	Cytosolic DNA-sensing pathway
AbaImmune84	K06083	WAS protein family,member 3	Fc gamma R-mediated phagocytosis
AbaImmune85	K04440	mitogen-activated protein kinase 8/9/10 (c-Jun N-terminal kinase) [EC:2.7.11.24]	Fc epsilon RI signaling pathway	IL-17 signaling pathway	Th17 cell differentiation	Th1 and Th2 cell differentiation	T cell receptor signaling pathway	C-type lectin receptor signaling pathway	RIG-I-like receptor signaling pathway	NOD-like receptor signaling pathway	Toll-like receptor signaling pathway	Toll and Imd signaling pathway
AbaImmune86	K04440	mitogen-activated protein kinase 8/9/10 (c-Jun N-terminal kinase) [EC:2.7.11.24]	Fc epsilon RI signaling pathway	IL-17 signaling pathway	Th17 cell differentiation	Th1 and Th2 cell differentiation	T cell receptor signaling pathway	C-type lectin receptor signaling pathway	RIG-I-like receptor signaling pathway	NOD-like receptor signaling pathway	Toll-like receptor signaling pathway	Toll and Imd signaling pathway
AbaImmune87	K04431	mitogen-activated protein kinase kinase 7 [EC:2.7.12.2]	Fc epsilon RI signaling pathway	T cell receptor signaling pathway	Toll-like receptor signaling pathway	Toll and Imd signaling pathway
AbaImmune88	K08339	autophagy-related protein 5	RIG-I-like receptor signaling pathway	NOD-like receptor signaling pathway
AbaImmune89	K04365	B-Raf proto-oncogene serine/threonine-protein kinase [EC:2.7.11.1]	Chemokine signaling pathway	Natural killer cell mediated cytotoxicity
AbaImmune90	K09490	endoplasmic reticulum chaperone BiP [EC:3.6.4.10]	Antigen processing and presentation
AbaImmune91	K04439	beta-arrestin	Chemokine signaling pathway
AbaImmune92	K09848	TNF receptor-associated factor 4	IL-17 signaling pathway
AbaImmune93	K11864	BRCA1/BRCA2-containing complex subunit 3 [EC:3.4.19.-]	NOD-like receptor signaling pathway
AbaImmune94	K05754	actin related protein 2/3 complex,subunit 5	Fc gamma R-mediated phagocytosis
AbaImmune95	K04371	mitogen-activated protein kinase 1/3 [EC:2.7.11.24]	Chemokine signaling pathway	Fc gamma R-mediated phagocytosis	Fc epsilon RI signaling pathway	IL-17 signaling pathway	Th17 cell differentiation	Th1 and Th2 cell differentiation	T cell receptor signaling pathway	Natural killer cell mediated cytotoxicity	C-type lectin receptor signaling pathway	NOD-like receptor signaling pathway	Toll-like receptor signaling pathway	Neutrophil extracellular trap formation	Platelet activation
AbaImmune96	K04729	myeloid differentiation primary response protein MyD88	NOD-like receptor signaling pathway	Toll-like receptor signaling pathway	Toll and Imd signaling pathway
AbaImmune97	K04447	Janus kinase 2 [EC:2.7.10.2]	Chemokine signaling pathway	Th17 cell differentiation	Th1 and Th2 cell differentiation
AbaImmune98	K05760	paxillin	Chemokine signaling pathway	Leukocyte transendothelial migration
AbaImmune99	K10802	high mobility group protein B1	Neutrophil extracellular trap formation
AbaImmune100	K06508	CD81 antigen	B cell receptor signaling pathway
AbaImmune101	K04393	cell division control protein 42	Chemokine signaling pathway	Leukocyte transendothelial migration	Fc gamma R-mediated phagocytosis	T cell receptor signaling pathway
AbaImmune102	K06053	recombining binding protein suppressor of hairless	Th1 and Th2 cell differentiation
AbaImmune103	K04427	mitogen-activated protein kinase kinase kinase 7 [EC:2.7.11.25]	IL-17 signaling pathway	T cell receptor signaling pathway	RIG-I-like receptor signaling pathway	NOD-like receptor signaling pathway	Toll-like receptor signaling pathway	Toll and Imd signaling pathway	Neutrophil extracellular trap formation
AbaImmune104	K11303	histone acetyltransferase 1 [EC:2.3.1.48]	Neutrophil extracellular trap formation
AbaImmune105	K03016	DNA-directed RNA polymerases I, II, and III subunit RPABC3	Cytosolic DNA-sensing pathway
AbaImmune106	K06052	jagged-1	Th1 and Th2 cell differentiation
AbaImmune107	K05863	solute carrier family 25 (mitochondrial adenine nucleotide translocator),member 4/5/6/31	Neutrophil extracellular trap formation
AbaImmune108	K03025	DNA-directed RNA polymerase III subunit RPC6	Cytosolic DNA-sensing pathway
AbaImmune109	K11406	histone deacetylase 4/5 [EC:3.5.1.98]	Neutrophil extracellular trap formation
AbaImmune110	K23691	serine/threonine-protein kinase N2 [EC:2.7.11.13]	NOD-like receptor signaling pathway
AbaImmune111	K12757	myosin regulatory light chain 12	Intestinal immune network for IgA production	Leukocyte transendothelial migration	Platelet activation
AbaImmune112	K07941	ADP-ribosylation factor 6	Fc gamma R-mediated phagocytosis
AbaImmune113	K06268	serine/threonine-protein phosphatase 2B regulatory subunit	B cell receptor signaling pathway	Th17 cell differentiation	Th1 and Th2 cell differentiation	T cell receptor signaling pathway	Natural killer cell mediated cytotoxicity	C-type lectin receptor signaling pathway
AbaImmune114	K07203	serine/threonine-protein kinase mTOR [EC:2.7.11.1]	Th17 cell differentiation	Toll and Imd signaling pathway
AbaImmune115	K06030	mitofusin 2 [EC:3.6.5.-]	NOD-like receptor signaling pathway
AbaImmune116	K05755	actin related protein 2/3 complex,subunit 4	Fc gamma R-mediated phagocytosis
AbaImmune117	K02677	classical protein kinase C alpha type [EC:2.7.11.13]	Intestinal immune network for IgA production	Leukocyte transendothelial migration	Fc gamma R-mediated phagocytosis	Fc epsilon RI signaling pathway	Natural killer cell mediated cytotoxicity	Neutrophil extracellular trap formation
AbaImmune118	K05719	integrin beta 1	Intestinal immune network for IgA production	Leukocyte transendothelial migration	Platelet activation
AbaImmune119	K06051	delta	Th1 and Th2 cell differentiation
AbaImmune120	K08043	adenylate cyclase 3 [EC:4.6.1.1]	Chemokine signaling pathway	Platelet activation
AbaImmune121	K00922	phosphatidylinositol-4,5-bisphosphate,3-kinase catalytic subunit alpha/beta/delta [EC:2.7.1.153]	Chemokine signaling pathway	Intestinal immune network for IgA production	Leukocyte transendothelial migration	Fc gamma R-mediated phagocytosis	Fc epsilon RI signaling pathway	B cell receptor signaling pathway	T cell receptor signaling pathway	Natural killer cell mediated cytotoxicity	C-type lectin receptor signaling pathway	Toll-like receptor signaling pathway	Neutrophil extracellular trap formation	Platelet activation
AbaImmune122	K06279	SHC-transforming protein 1	Chemokine signaling pathway	Natural killer cell mediated cytotoxicity
AbaImmune123	K05699	actinin alpha 1/4	Intestinal immune network for IgA production	Leukocyte transendothelial migration
AbaImmune124	K05719	integrin beta 1	Intestinal immune network for IgA production	Leukocyte transendothelial migration	Platelet activation
AbaImmune125	K12366	engulfment and cell motility protein 1	Chemokine signaling pathway
AbaImmune126	K05756	actin related protein 2/3 complex subunit 3	Fc gamma R-mediated phagocytosis
AbaImmune127	K04734	NF-kappa-B inhibitor alpha	Chemokine signaling pathway	B cell receptor signaling pathway	IL-17 signaling pathway	Th17 cell differentiation	Th1 and Th2 cell differentiation	T cell receptor signaling pathway	C-type lectin receptor signaling pathway	Cytosolic DNA-sensing pathway	RIG-I-like receptor signaling pathway	NOD-like receptor signaling pathway	Toll-like receptor signaling pathway	Toll and Imd signaling pathway
AbaImmune128	K05725	focal adhesion kinase 1 [EC:2.7.10.2]	Chemokine signaling pathway	Leukocyte transendothelial migration
AbaImmune129	K04392	Ras-related C3 botulinum toxin substrate 1	Chemokine signaling pathway	Intestinal immune network for IgA production	Leukocyte transendothelial migration	Fc gamma R-mediated phagocytosis	Fc epsilon RI signaling pathway	B cell receptor signaling pathway	Natural killer cell mediated cytotoxicity	Toll-like receptor signaling pathway	Neutrophil extracellular trap formation
AbaImmune130	K04432	mitogen-activated protein kinase kinase 3 [EC:2.7.12.2]	Fc epsilon RI signaling pathway	Toll-like receptor signaling pathway	Toll and Imd signaling pathway
AbaImmune131	K04348	serine/threonine-protein phosphatase 2B catalytic subunit [EC:3.1.3.16]	B cell receptor signaling pathway	Th17 cell differentiation	Th1 and Th2 cell differentiation	T cell receptor signaling pathway	Natural killer cell mediated cytotoxicity	C-type lectin receptor signaling pathway
AbaImmune132	K04348	serine/threonine-protein phosphatase 2B catalytic subunit [EC:3.1.3.16]	B cell receptor signaling pathway	Th17 cell differentiation	Th1 and Th2 cell differentiation	T cell receptor signaling pathway	Natural killer cell mediated cytotoxicity	C-type lectin receptor signaling pathway
AbaImmune133	K11253	histone H3	Neutrophil extracellular trap formation
AbaImmune134	K11253	histone H3	Neutrophil extracellular trap formation
AbaImmune135	K11254	histone H4	Neutrophil extracellular trap formation
AbaImmune136	K11253	histone H3	Neutrophil extracellular trap formation
AbaImmune137	K11254	histone H4	Neutrophil extracellular trap formation
AbaImmune138	K11252	histone H2B	Neutrophil extracellular trap formation
AbaImmune139	K11254	histone H4	Neutrophil extracellular trap formation
AbaImmune140	K11252	histone H2B	Neutrophil extracellular trap formation
AbaImmune141	K03024	DNA-directed RNA polymerase III subunit RPC7	Cytosolic DNA-sensing pathway
AbaImmune142	K04630	guanine nucleotide-binding protein G(i) subunit alpha	Chemokine signaling pathway	Leukocyte transendothelial migration	Platelet activation
AbaImmune143	K04513	Ras homolog gene family,member A	Chemokine signaling pathway	Leukocyte transendothelial migration	C-type lectin receptor signaling pathway	NOD-like receptor signaling pathway	Platelet activation
AbaImmune144	K08056	protein disulfide-isomerase A3 [EC:5.3.4.1]	NOD-like receptor signaling pathway
AbaImmune145	K17065	dynamin 1-like protein [EC:3.6.5.5]	NOD-like receptor signaling pathway
AbaImmune146	K09565	peptidyl-prolyl isomerase F (cyclophilin D) [EC:5.2.1.8]	Neutrophil extracellular trap formation
AbaImmune147	K04393	cell division control protein 42	Chemokine signaling pathway	Leukocyte transendothelial migration	Fc gamma R-mediated phagocytosis	T cell receptor signaling pathway
AbaImmune148	K03007	DNA-directed RNA polymerases I, II, and III subunit RPABC5	Cytosolic DNA-sensing pathway
AbaImmune149	K11252	histone H2B	Neutrophil extracellular trap formation
AbaImmune150	K04368	mitogen-activated protein kinase kinase 1 [EC:2.7.12.2]	Chemokine signaling pathway	Fc gamma R-mediated phagocytosis	Fc epsilon RI signaling pathway	B cell receptor signaling pathway	Neutrophil extracellular trap formation
AbaImmune151	K04539	guanine nucleotide-binding protein subunit beta-5	Chemokine signaling pathway
AbaImmune152	K06276	3-phosphoinositide dependent protein kinase-1 [EC:2.7.11.1]	Fc epsilon RI signaling pathway
AbaImmune153	K03283	heat shock 70kDa protein 1/2/6/8	Antigen processing and presentation
AbaImmune154	K08066	nuclear transcription factor Y,gamma	Antigen processing and presentation
AbaImmune155	K03175	TNF receptor-associated factor 6 EC:2.3.2.27	IL-17 signaling pathway	RIG-I-like receptor signaling pathway	Toll-like receptor signaling pathway
AbaImmune156	K19862	NCK adaptor protein 2	T cell receptor signaling pathway
AbaImmune157	K17260	actin-related protein 2	Fc gamma R-mediated phagocytosis
AbaImmune158	K04345	protein kinase A [EC:2.7.11.11]	Platelet activation
AbaImmune159	K05719	integrin beta 1	Intestinal immune network for IgA production	Leukocyte transendothelial migration	Platelet activation
AbaImmune160	K02649	phosphoinositide-3-kinase regulatory subunit alpha/beta/delta	Chemokine signaling pathway	Leukocyte transendothelial migration	Fc gamma R-mediated phagocytosis	Fc epsilon RI signaling pathway	B cell receptor signaling pathway	T cell receptor signaling pathway	Natural killer cell mediated cytotoxicity	C-type lectin receptor signaling pathway	Neutrophil extracellular trap formation	Platelet activation
AbaImmune161	K00889	1-phosphatidylinositol-4-phosphate 5-kinase [EC:2.7.1.68]	Fc gamma R-mediated phagocytosis
AbaImmune162	K04392	Ras-related C3 botulinum toxin substrate 1	Chemokine signaling pathway	Intestinal immune network for IgA production	Leukocyte transendothelial migration	Fc gamma R-mediated phagocytosis	Fc epsilon RI signaling pathway	B cell receptor signaling pathway	Natural killer cell mediated cytotoxicity	Toll-like receptor signaling pathway	Neutrophil extracellular trap formation
AbaImmune163	K09035	transcription factor Maf	Th1 and Th2 cell differentiation
AbaImmune164	K04398	caspase 8 [EC:3.4.22.61]	IL-17 signaling pathway	C-type lectin receptor signaling pathway	RIG-I-like receptor signaling pathway	Toll-like receptor signaling pathway	Toll and Imd signaling pathway
AbaImmune165	K04674	TGF-beta receptor type-1 [EC:2.7.11.30]	IL-17 signaling pathway	Th17 cell differentiation
AbaImmune166	K03023	DNA-directed RNA polymerase III subunit RPC3	Cytosolic DNA-sensing pathway
AbaImmune167	K09578	peptidyl-prolyl cis-trans isomerase NIMA-interacting 1 [EC:5.2.1.8]	RIG-I-like receptor signaling pathway
AbaImmune168	K06067	histone deacetylase 1/2 [EC:3.5.1.98]	Neutrophil extracellular trap formation
AbaImmune169	K04448	transcription factor AP-1	B cell receptor signaling pathway	IL-17 signaling pathway	Th17 cell differentiation	Th1 and Th2 cell differentiation	T cell receptor signaling pathway	C-type lectin receptor signaling pathway	NOD-like receptor signaling pathway	Toll and Imd signaling pathway
AbaImmune170	K03083	glycogen synthase kinase 3 beta [EC:2.7.11.26]	B cell receptor signaling pathway	T cell receptor signaling pathway
AbaImmune171	K05012	chloride channel 3/4/5	Neutrophil extracellular trap formation
AbaImmune172	K01344	protein C (activated) [EC:3.4.21.69]	Complement and coagulation cascades
AbaImmune173	K17890	autophagy-related protein 16-1	NOD-like receptor signaling pathway
AbaImmune174	K04439	beta-arrestin	Chemokine signaling pathway
AbaImmune175	K05702	afadin	Leukocyte transendothelial migration
AbaImmune176	K11974	E3 ubiquitin-protein ligase RNF31 EC:2.3.2.31	Toll-like receptor signaling pathway	Platelet activation
AbaImmune177	K11594	ATP-dependent RNA helicase DDX3X EC:3.6.4.13	RIG-I-like receptor signaling pathway
AbaImmune178	K06484	integrin alpha 5	Hematopoietic cell lineage
AbaImmune179	K05691	catenin alpha	Leukocyte transendothelial migration
AbaImmune180	K18050	novel protein kinase C epsilon type [EC:2.7.11.1]3	Fc gamma R-mediated phagocytosis
AbaImmune181	K06698	proteasome activator subunit 3 (PA28 gamma)	Antigen processing and presentation
AbaImmune182	K04456	RAC serine/threonine-protein kinase [EC:2.7.11.1]	Chemokine signaling pathway	Fc gamma R-mediated phagocytosis	Fc epsilon RI signaling pathway	B cell receptor signaling pathway	T cell receptor signaling pathway	C-type lectin receptor signaling pathway	Neutrophil extracellular trap formation	Platelet activation
AbaImmune183	K17820	ATP-dependent RNA helicase DHX33 EC:3.6.4.13	Toll-like receptor signaling pathway
AbaImmune184	K07364	tyrosine-protein kinase Tec [EC:2.7.10.2]	T cell receptor signaling pathway
AbaImmune185	K19603	mitogen-activated protein kinase 15 [EC:2.7.11.24]	B cell receptor signaling pathway
AbaImmune186	K05757	actin related protein 2/3 complex subunit 1A/1B	Fc gamma R-mediated phagocytosis
AbaImmune187	K03013	DNA-directed RNA polymerases I, II, and III subunit RPABC1	Cytosolic DNA-sensing pathway
AbaImmune188	K03352	anaphase-promoting complex subunit 5	B cell receptor signaling pathway	IL-17 signaling pathway
AbaImmune189	K04409	p21-activated kinase 1 [EC:2.7.11.1]	Chemokine signaling pathway	Fc gamma R-mediated phagocytosis	T cell receptor signaling pathway	Natural killer cell mediated cytotoxicity	C-type lectin receptor signaling pathway
AbaImmune190	K08049	adenylate cyclase 9 [EC:4.6.1.1]	Chemokine signaling pathway	Platelet activation
AbaImmune191	K05730	guanine nucleotide exchange factor VAV	Chemokine signaling pathway	Leukocyte transendothelial migration	Fc gamma R-mediated phagocytosis	Fc epsilon RI signaling pathway	B cell receptor signaling pathway	T cell receptor signaling pathway	Natural killer cell mediated cytotoxicity
AbaImmune192	K07831	Ras-related protein M-Ras	C-type lectin receptor signaling pathway
AbaImmune193	K16060	baculoviral IAP repeat-containing protein 2/3	Toll-like receptor signaling pathway	Toll and Imd signaling pathway
AbaImmune194	K03018	DNA-directed RNA polymerase III subunit RPC1 EC:2.7.7.6	Cytosolic DNA-sensing pathway
AbaImmune195	K08601	ubiquitin carboxyl-terminal hydrolase CYLD [EC:3.4.19.12]	C-type lectin receptor signaling pathway	RIG-I-like receptor signaling pathway
AbaImmune196	K02105	catenin beta 1	Leukocyte transendothelial migration
AbaImmune197	K10630	RanBP-type and C3HC4-type zinc finger-containing protein 1 EC:2.3.2.31	Toll-like receptor signaling pathway
AbaImmune198	K06061	mastermind	Th1 and Th2 cell differentiation
AbaImmune199	K06061	mastermind	Th1 and Th2 cell differentiation
AbaImmune200	K06061	mastermind	Th1 and Th2 cell differentiation
AbaImmune201	K08042	adenylate cyclase 2 [EC:4.6.1.1]	Chemokine signaling pathway
AbaImmune202	K03099	son of sevenless	Chemokine signaling pathway	Fc epsilon RI signaling pathway	B cell receptor signaling pathway	T cell receptor signaling pathway	Natural killer cell mediated cytotoxicity
AbaImmune203	K17388	Rho-associated protein kinase 2 [EC:2.7.11.1]	Chemokine signaling pathway	Leukocyte transendothelial migration	Platelet activation
AbaImmune204	K20915	tumor suppressor p53-binding protein 1	Toll-like receptor signaling pathway
AbaImmune205	K18584	actin-related protein 3	Fc gamma R-mediated phagocytosis
AbaImmune206	K13708	dedicator of cytokinesis protein 1	Fc gamma R-mediated phagocytosis
AbaImmune207	K01080	phosphatidate phosphatase EC:3.1.3.4	Fc gamma R-mediated phagocytosis
AbaImmune208	K04237	partitioning defective protein 3	Chemokine signaling pathway
Wufu
ID	K0	product	Pathway
WufuImmune1	K17260	actin-related protein 2	Fc gamma R-mediated phagocytosis
WufuImmune2	K02183	calmodulin	C-type lectin receptor signaling pathway
WufuImmune3	K04501	mothers against decapentaplegic homolog 4	Th17 cell differentiation
WufuImmune4	K02580	nuclear factor NF-kappa-B p105 subunit	Chemokine signaling pathway	B cell receptor signaling pathway	IL-17 signaling pathway	Th17 cell differentiation	Th1 and Th2 cell differentiation	T cell receptor signaling pathway	C-type lectin receptor signaling pathway	Cytosolic DNA-sensing pathway	RIG-I-like receptor signaling pathway	NOD-like receptor signaling pathway	Toll-like receptor signaling pathway	Toll and Imd signaling pathway	Neutrophil extracellular trap formation
WufuImmune5	K08064	nuclear transcription factor Y alpha	Antigen processing and presentation
WufuImmune6	K01115	phospholipase D1/2 [EC:3.1.4.4]	Fc gamma R-mediated phagocytosis
WufuImmune7	K04718	sphingosine kinase [EC:2.7.1.91]	Fc gamma R-mediated phagocytosis
WufuImmune8	K07532	Rho guanine nucleotide exchange factor 12	C-type lectin receptor signaling pathway
WufuImmune9	K13708	dedicator of cytokinesis protein 1	Fc gamma R-mediated phagocytosis
WufuImmune10	K11404	histone deacetylase 3 [EC:3.5.1.98]	Neutrophil extracellular trap formation
WufuImmune11	K11252	histone H2B	Neutrophil extracellular trap formation
WufuImmune12	K04427	mitogen-activated protein kinase kinase kinase 7 EC:2.7.11.25	IL-17 signaling pathway	T cell receptor signaling pathway	RIG-I-like receptor signaling pathway	NOD-like receptor signaling pathway	Toll-like receptor signaling pathway	Toll and Imd signaling pathway	Neutrophil extracellular trap formation
WufuImmune13	K05765	cofilin	Fc gamma R-mediated phagocytosis
WufuImmune14	K07827	GTPase Kras	Chemokine signaling pathway	Fc epsilon RI signaling pathway	B cell receptor signaling pathway	IL-17 signaling pathway	T cell receptor signaling pathway	Natural killer cell mediated cytotoxicity	C-type lectin receptor signaling pathway
WufuImmune15	K07369	mucosa-associated lymphoid tissue lymphoma translocation protein 1 EC:3.4.22.-	B cell receptor signaling pathway	T cell receptor signaling pathway	C-type lectin receptor signaling pathway
WufuImmune16	K04448	transcription factor AP-1	B cell receptor signaling pathway	IL-17 signaling pathway	Th17 cell differentiation	Th1 and Th2 cell differentiation	T cell receptor signaling pathway	C-type lectin receptor signaling pathway	NOD-like receptor signaling pathway	Toll and Imd signaling pathway
WufuImmune17	K06067	histone deacetylase 1/2 [EC:3.5.1.98]	Neutrophil extracellular trap formation
WufuImmune18	K05858	phosphatidylinositol phospholipase C beta [EC:3.1.4.11]	Chemokine signaling pathway	NOD-like receptor signaling pathway	Neutrophil extracellular trap formation	Platelet activation
WufuImmune19	K03083	glycogen synthase kinase 3 beta [EC:2.7.11.26]	B cell receptor signaling pathway	T cell receptor signaling pathway
WufuImmune20	K03083	glycogen synthase kinase 3 beta [EC:2.7.11.26]	B cell receptor signaling pathway	T cell receptor signaling pathway
WufuImmune21	K04439	beta-arrestin	Chemokine signaling pathway
WufuImmune22	K05863	solute carrier family 25 (mitochondrial adenine nucleotide translocator),member 4/5/6/31	Neutrophil extracellular trap formation
WufuImmune23	K03025	DNA-directed RNA polymerase III subunit RPC6	Cytosolic DNA-sensing pathway
WufuImmune24	K06052	jagged-1	Th1 and Th2 cell differentiation
WufuImmune25	K17890	autophagy-related protein 16-1	NOD-like receptor signaling pathway
WufuImmune26	K05691	catenin alpha	Leukocyte transendothelial migration
WufuImmune27	K11253	histone H3	Neutrophil extracellular trap formation
WufuImmune28	K11254	histone H4	Neutrophil extracellular trap formation
WufuImmune29	K11252	histone H2B	Neutrophil extracellular trap formation
WufuImmune30	K11254	histone H4	Neutrophil extracellular trap formation
WufuImmune31	K11252	histone H2B	Neutrophil extracellular trap formation
WufuImmune32	K03024	DNA-directed RNA polymerase III subunit RPC7	Cytosolic DNA-sensing pathway
WufuImmune33	K04630	guanine nucleotide-binding protein G(i) subunit alpha	Chemokine signaling pathway	Leukocyte transendothelial migration	Platelet activation
WufuImmune34	K04513	Ras homolog gene family,member A	Chemokine signaling pathway	Leukocyte transendothelial migration	C-type lectin receptor signaling pathway	NOD-like receptor signaling pathway	Platelet activation
WufuImmune35	K08056	protein disulfide-isomerase A3 [EC:5.3.4.1]	NOD-like receptor signaling pathway
WufuImmune36	K16060	baculoviral IAP repeat-containing protein 2/3	Toll-like receptor signaling pathway	Toll and Imd signaling pathway
WufuImmune37	K17065	dynamin 1-like protein [EC:3.6.5.5]	NOD-like receptor signaling pathway
WufuImmune38	K11253	histone H3	Neutrophil extracellular trap formation
WufuImmune39	K11253	histone H3	Neutrophil extracellular trap formation
WufuImmune40	K11254	histone H4	Neutrophil extracellular trap formation
WufuImmune41	K08057	calreticulin	Antigen processing and presentation
WufuImmune42	K04348	serine/threonine-protein phosphatase 2B catalytic subunit [EC:3.1.3.16]	B cell receptor signaling pathway	Th17 cell differentiation	Th1 and Th2 cell differentiation	T cell receptor signaling pathway	Natural killer cell mediated cytotoxicity	C-type lectin receptor signaling pathway
WufuImmune43	K04348	serine/threonine-protein phosphatase 2B catalytic subunit [EC:3.1.3.16]	B cell receptor signaling pathway	Th17 cell differentiation	Th1 and Th2 cell differentiation	T cell receptor signaling pathway	Natural killer cell mediated cytotoxicity	C-type lectin receptor signaling pathway
WufuImmune44	K02649	phosphoinositide-3-kinase regulatory subunit alpha/beta/delta	Chemokine signaling pathway	Leukocyte transendothelial migration	Fc gamma R-mediated phagocytosis	Fc epsilon RI signaling pathway	B cell receptor signaling pathway	T cell receptor signaling pathway	Natural killer cell mediated cytotoxicity	C-type lectin receptor signaling pathway	Neutrophil extracellular trap formation	Platelet activation
WufuImmune45	K14721	DNA-directed RNA polymerase III subunit RPC5	Cytosolic DNA-sensing pathway
WufuImmune46	K04547	guanine nucleotide-binding protein G(I)/G(S)/G(O) subunit gamma-13	Chemokine signaling pathway
WufuImmune47	K11252	histone H2B	Neutrophil extracellular trap formation
WufuImmune48	K11254	histone H4	Neutrophil extracellular trap formation
WufuImmune49	K08065	nuclear transcription Y subunit beta	Antigen processing and presentation
WufuImmune50	K03022	DNA-directed RNA polymerase III subunit RPC8	Cytosolic DNA-sensing pathway
WufuImmune51	K05757	actin related protein 2/3 complex subunit 1A/1B	Fc gamma R-mediated phagocytosis
WufuImmune52	K05692	actin beta/gamma 1	Intestinal immune network for IgA production	Leukocyte transendothelial migration	Neutrophil extracellular trap formation	Platelet activation
WufuImmune53	K06276	3-phosphoinositide dependent protein kinase-1 [EC:2.7.11.1]	Fc epsilon RI signaling pathway
WufuImmune54	K11406	histone deacetylase 4/5 [EC:3.5.1.98]	Neutrophil extracellular trap formation
WufuImmune55	K07941	ADP-ribosylation factor 6	Fc gamma R-mediated phagocytosis
WufuImmune56	K06268	serine/threonine-protein phosphatase 2B regulatory subunit	B cell receptor signaling pathway	Th17 cell differentiation	Th1 and Th2 cell differentiation	T cell receptor signaling pathway	Natural killer cell mediated cytotoxicity	C-type lectin receptor signaling pathway
WufuImmune57	K07203	serine/threonine-protein kinase mTOR [EC:2.7.11.1]	Th17 cell differentiation	Toll and Imd signaling pathway
WufuImmune58	K06030	mitofusin 2 [EC:3.6.5.-]	NOD-like receptor signaling pathway
WufuImmune59	K05755	actin related protein 2/3 complex subunit 4	Fc gamma R-mediated phagocytosis
WufuImmune60	K02677	classical protein kinase C alpha type [EC:2.7.11.1]3	Intestinal immune network for IgA production	Leukocyte transendothelial migration	Fc gamma R-mediated phagocytosis	Fc epsilon RI signaling pathway	Natural killer cell mediated cytotoxicity	Neutrophil extracellular trap formation
WufuImmune61	K05719	integrin beta 1	Intestinal immune network for IgA production	Leukocyte transendothelial migration	Platelet activation
WufuImmune62	K06051	delta	Th1 and Th2 cell differentiation
WufuImmune63	K08601	ubiquitin carboxyl-terminal hydrolase CYLD [EC:3.4.19.12]	C-type lectin receptor signaling pathway	RIG-I-like receptor signaling pathway
WufuImmune64	K00922	phosphatidylinositol-45-bisphosphate 3-kinase catalytic subunit alpha/beta/delta [EC:2.7.1.153]	Chemokine signaling pathway	Intestinal immune network for IgA production	Leukocyte transendothelial migration	Fc gamma R-mediated phagocytosis	Fc epsilon RI signaling pathway	B cell receptor signaling pathway	T cell receptor signaling pathway	Natural killer cell mediated cytotoxicity	C-type lectin receptor signaling pathway	Toll-like receptor signaling pathway	Neutrophil extracellular trap formation	Platelet activation
WufuImmune65	K05699	actinin alpha 1/4	Intestinal immune network for IgA production	Leukocyte transendothelial migration
WufuImmune66	K04456	RAC serine/threonine-protein kinase [EC:2.7.11.1]	Chemokine signaling pathway	Fc gamma R-mediated phagocytosis	Fc epsilon RI signaling pathway	B cell receptor signaling pathway	T cell receptor signaling pathway	C-type lectin receptor signaling pathway	Neutrophil extracellular trap formation	Platelet activation
WufuImmune67	K04409	p21-activated kinase 1 [EC:2.7.11.1]	Chemokine signaling pathway	Fc gamma R-mediated phagocytosis	T cell receptor signaling pathway	Natural killer cell mediated cytotoxicity	C-type lectin receptor signaling pathway
WufuImmune68	K04730	interleukin-1 receptor-associated kinase 1 [EC:2.7.11.1]	Toll-like receptor signaling pathway	Toll and Imd signaling pathway
WufuImmune69	K03099	son of sevenless	Chemokine signaling pathway	Fc epsilon RI signaling pathway	B cell receptor signaling pathway	T cell receptor signaling pathway	Natural killer cell mediated cytotoxicity
WufuImmune70	K05410	TANK-binding kinase 1 [EC:2.7.11.1]0	IL-17 signaling pathway	Cytosolic DNA-sensing pathway	RIG-I-like receptor signaling pathway	NOD-like receptor signaling pathway	Toll-like receptor signaling pathway
WufuImmune71	K04079	molecular chaperone HtpG	IL-17 signaling pathway	Th17 cell differentiation	Antigen processing and presentation	NOD-like receptor signaling pathway
WufuImmune72	K05863	solute carrier family 25 (mitochondrial adenine nucleotide translocator),member 4/5/6/31	Neutrophil extracellular trap formation
WufuImmune73	K11140	aminopeptidase N [EC:3.4.11.2]	Hematopoietic cell lineage
WufuImmune74	K11140	aminopeptidase N [EC:3.4.11.2]	Hematopoietic cell lineage
WufuImmune75	K11140	aminopeptidase N [EC:3.4.11.2]	Hematopoietic cell lineage
WufuImmune76	K03019	DNA-directed RNA polymerase III subunit RPC11	Cytosolic DNA-sensing pathway
WufuImmune77	K04729	myeloid differentiation primary response protein MyD88	NOD-like receptor signaling pathway	Toll-like receptor signaling pathway	Toll and Imd signaling pathway
WufuImmune78	K04371	mitogen-activated protein kinase 1/3 [EC:2.7.11.24]	Chemokine signaling pathway	Fc gamma R-mediated phagocytosis	Fc epsilon RI signaling pathway	IL-17 signaling pathway	Th17 cell differentiation	Th1 and Th2 cell differentiation	T cell receptor signaling pathway	Natural killer cell mediated cytotoxicity	C-type lectin receptor signaling pathway	NOD-like receptor signaling pathway	Toll-like receptor signaling pathway	Neutrophil extracellular trap formation	Platelet activation
WufuImmune79	K06484	integrin alpha 5	Hematopoietic cell lineage
WufuImmune80	K03283	heat shock 70kDa protein 1/2/6/8	Antigen processing and presentation
WufuImmune81	K06279	SHC-transforming protein 1	Chemokine signaling pathway	Natural killer cell mediated cytotoxicity
WufuImmune82	K04237	partitioning defective protein 3	Chemokine signaling pathway
WufuImmune83	K04345	protein kinase A [EC:2.7.11.1]1	Platelet activation
WufuImmune84	K00889	1-phosphatidylinositol-4-phosphate 5-kinase [EC:2.7.1.68]	Fc gamma R-mediated phagocytosis
WufuImmune85	K08341	GABA(A) receptor-associated protein	NOD-like receptor signaling pathway
WufuImmune86	K07831	Ras-related protein M-Ras	C-type lectin receptor signaling pathway
WufuImmune87	K05858	phosphatidylinositol phospholipase C beta [EC:3.1.4.11]	Chemokine signaling pathway	NOD-like receptor signaling pathway	Neutrophil extracellular trap formation	Platelet activation
WufuImmune88	K17388	Rho-associated protein kinase 2 [EC:2.7.11.1]	Chemokine signaling pathway	Leukocyte transendothelial migration	Platelet activation
WufuImmune89	K17820	ATP-dependent RNA helicase DHX33 EC:3.6.4.13	Toll-like receptor signaling pathway
WufuImmune90	K19862	NCK adaptor protein 2	T cell receptor signaling pathway
WufuImmune91	K03283	heat shock 70kDa protein 1/2/6/8	Antigen processing and presentation
WufuImmune92	K08066	nuclear transcription factor Y gamma	Antigen processing and presentation
WufuImmune93	K03175	TNF receptor-associated factor 6 EC:2.3.2.27	IL-17 signaling pathway	RIG-I-like receptor signaling pathway	Toll-like receptor signaling pathway
WufuImmune94	K12757	myosin regulatory light chain 12	Intestinal immune network for IgA production	Leukocyte transendothelial migration	Platelet activation
WufuImmune95	K04440	mitogen-activated protein kinase 8/9/10 (c-Jun N-terminal kinase) [EC:2.7.11.24]	Fc epsilon RI signaling pathway	IL-17 signaling pathway	Th17 cell differentiation	Th1 and Th2 cell differentiation	T cell receptor signaling pathway	C-type lectin receptor signaling pathway	RIG-I-like receptor signaling pathway	NOD-like receptor signaling pathway	Toll-like receptor signaling pathway	Toll and Imd signaling pathway
WufuImmune96	K08339	autophagy-related protein 5	RIG-I-like receptor signaling pathway	NOD-like receptor signaling pathway
WufuImmune97	K04365	B-Raf proto-oncogene serine/threonine-protein kinase [EC:2.7.11.1]	Chemokine signaling pathway	Natural killer cell mediated cytotoxicity
WufuImmune98	K09490	endoplasmic reticulum chaperone BiP [EC:3.6.4.10]	Antigen processing and presentation
WufuImmune99	K04440	mitogen-activated protein kinase 8/9/10 (c-Jun N-terminal kinase) [EC:2.7.11.24]	Fc epsilon RI signaling pathway	IL-17 signaling pathway	Th17 cell differentiation	Th1 and Th2 cell differentiation	T cell receptor signaling pathway	C-type lectin receptor signaling pathway	RIG-I-like receptor signaling pathway	NOD-like receptor signaling pathway	Toll-like receptor signaling pathway	Toll and Imd signaling pathway
WufuImmune100	K04439	beta-arrestin	Chemokine signaling pathway
WufuImmune101	K05730	guanine nucleotide exchange factor VAV	Chemokine signaling pathway	Leukocyte transendothelial migration	Fc gamma R-mediated phagocytosis	Fc epsilon RI signaling pathway	B cell receptor signaling pathway	T cell receptor signaling pathway	Natural killer cell mediated cytotoxicity
WufuImmune102	K04431	mitogen-activated protein kinase kinase 7 [EC:2.7.12.2]	Fc epsilon RI signaling pathway	T cell receptor signaling pathway	Toll-like receptor signaling pathway	Toll and Imd signaling pathway
WufuImmune103	K19603	mitogen-activated protein kinase 15 [EC:2.7.11.24]	B cell receptor signaling pathway
WufuImmune104	K02373	FAS-associated death domain protein	IL-17 signaling pathway	RIG-I-like receptor signaling pathway	NOD-like receptor signaling pathway	Toll-like receptor signaling pathway	Toll and Imd signaling pathway
WufuImmune105	K20858	calcium uniporter protein mitochondrial	NOD-like receptor signaling pathway
WufuImmune106	K09487	heat shock protein 90kDa beta	IL-17 signaling pathway
WufuImmune107	K08337	ubiquitin-like modifier-activating enzyme ATG7	Neutrophil extracellular trap formation
WufuImmune108	K05756	actin related protein 2/3 complex subunit 3	Fc gamma R-mediated phagocytosis
WufuImmune109	K12366	engulfment and cell motility protein 1	Chemokine signaling pathway
WufuImmune110	K05725	focal adhesion kinase 1 [EC:2.7.10.2]	Chemokine signaling pathway	Leukocyte transendothelial migration
WufuImmune111	K04734	NF-kappa-B inhibitor alpha	Chemokine signaling pathway	B cell receptor signaling pathway	IL-17 signaling pathway	Th17 cell differentiation	Th1 and Th2 cell differentiation	T cell receptor signaling pathway	C-type lectin receptor signaling pathway	Cytosolic DNA-sensing pathway	RIG-I-like receptor signaling pathway	NOD-like receptor signaling pathway	Toll-like receptor signaling pathway	Toll and Imd signaling pathway
WufuImmune112	K12890	splicing factor arginine/serine-rich 1	IL-17 signaling pathway
WufuImmune113	K08291	G protein-coupled receptor kinase [[[EC:2.7.11.1]6]]	Chemokine signaling pathway
WufuImmune114	K04403	TAK1-binding protein 1	NOD-like receptor signaling pathway	Toll-like receptor signaling pathway
WufuImmune115	K06508	CD81 antigen	B cell receptor signaling pathway
WufuImmune116	K04008	CD59 antigen	Complement and coagulation cascades	Hematopoietic cell lineage
WufuImmune117	K08045	adenylate cyclase 5 [EC:4.6.1.1]	Chemokine signaling pathway	Platelet activation
WufuImmune118	K03027	DNA-directed RNA polymerases I and III subunit RPAC1	Cytosolic DNA-sensing pathway
WufuImmune119	K08059	interferon gamma-inducible protein 30	Antigen processing and presentation
WufuImmune120	K02183	calmodulin	C-type lectin receptor signaling pathway
WufuImmune121	K15040	voltage-dependent anion channel protein 2	NOD-like receptor signaling pathway	Neutrophil extracellular trap formation
WufuImmune122	K11224	signal transducer and activator of transcription 5B	Chemokine signaling pathway	Th17 cell differentiation	Th1 and Th2 cell differentiation
WufuImmune123	K03013	DNA-directed RNA polymerases I, II, and III subunit RPABC1	Cytosolic DNA-sensing pathway
WufuImmune124	K04364	growth factor receptor-bound protein 2	Chemokine signaling pathway	Fc epsilon RI signaling pathway	B cell receptor signaling pathway	T cell receptor signaling pathway	Natural killer cell mediated cytotoxicity
WufuImmune125	K04438	C-crk adapter molecule crk	Chemokine signaling pathway	Fc gamma R-mediated phagocytosis
WufuImmune126	K12655	OTU domain-containing protein 5 [EC:3.4.19.12]	RIG-I-like receptor signaling pathway
WufuImmune127	K04536	guanine nucleotide-binding protein G(I)/G(S)/G(T) subunit beta-1	Chemokine signaling pathway
WufuImmune128	K03014	DNA-directed RNA polymerases I, II, and III subunit RPABC2	Cytosolic DNA-sensing pathway
WufuImmune129	K05719	integrin beta 1	Intestinal immune network for IgA production	Leukocyte transendothelial migration	Platelet activation
WufuImmune130	K04345	protein kinase A [EC:2.7.11.1]1	Platelet activation
WufuImmune131	K18050	novel protein kinase C epsilon type [EC:2.7.11.1]3	Fc gamma R-mediated phagocytosis
WufuImmune132	K04353	Ras-related protein Rap-1A	Chemokine signaling pathway	Leukocyte transendothelial migration	Platelet activation
WufuImmune133	K08049	adenylate cyclase 9 [EC:4.6.1.1]	Chemokine signaling pathway	Platelet activation
WufuImmune134	K09848	TNF receptor-associated factor 4	IL-17 signaling pathway
WufuImmune135	K00863	triose/dihydroxyacetone kinase / FAD-AMP lyase (cyclizing) [[EC:2.7.1.28 2.7.1.29 4.6.1.15]]	RIG-I-like receptor signaling pathway
WufuImmune136	K04430	mitogen-activated protein kinase kinase 4 [EC:2.7.12.2]	Fc epsilon RI signaling pathway	Toll-like receptor signaling pathway
WufuImmune137	K05704	tyrosine-protein kinase Src [EC:2.7.10.2]	Chemokine signaling pathway	C-type lectin receptor signaling pathway	Neutrophil extracellular trap formation	Platelet activation
WufuImmune138	K11303	histone acetyltransferase 1 [EC:2.3.1.48]	Neutrophil extracellular trap formation
WufuImmune139	K01116	phosphatidylinositol phospholipase C gamma-1 [EC:3.1.4.11]	Chemokine signaling pathway	Leukocyte transendothelial migration	Fc gamma R-mediated phagocytosis	Fc epsilon RI signaling pathway	Th17 cell differentiation	Th1 and Th2 cell differentiation	T cell receptor signaling pathway	Natural killer cell mediated cytotoxicity	Neutrophil extracellular trap formation
WufuImmune140	K03026	DNA-directed RNA polymerase III subunit RPC4	Cytosolic DNA-sensing pathway
WufuImmune141	K04398	caspase 8 [EC:3.4.22.61]	IL-17 signaling pathway	C-type lectin receptor signaling pathway	RIG-I-like receptor signaling pathway	Toll-like receptor signaling pathway	Toll and Imd signaling pathway
WufuImmune142	K09035	transcription factor Maf	Th1 and Th2 cell differentiation
WufuImmune143	K04392	Ras-related C3 botulinum toxin substrate 1	Chemokine signaling pathway	Intestinal immune network for IgA production	Leukocyte transendothelial migration	Fc gamma R-mediated phagocytosis	Fc epsilon RI signaling pathway	B cell receptor signaling pathway	Natural killer cell mediated cytotoxicity	Toll-like receptor signaling pathway	Neutrophil extracellular trap formation
WufuImmune144	K09578	peptidyl-prolyl cis-trans isomerase NIMA-interacting 1 [[EC:5.2.1.8]]	RIG-I-like receptor signaling pathway
WufuImmune145	K04674	TGF-beta receptor type-1 [EC:2.7.11.30]	IL-17 signaling pathway	Th17 cell differentiation
WufuImmune146	K06698	proteasome activator subunit 3 (PA28 gamma)	Antigen processing and presentation
WufuImmune147	K06083	WAS protein family,member 3	Fc gamma R-mediated phagocytosis
WufuImmune148	K05743	LIM domain kinase 1 [EC:2.7.11.1]	Fc gamma R-mediated phagocytosis
WufuImmune149	K04393	cell division control protein 42	Chemokine signaling pathway	Leukocyte transendothelial migration	Fc gamma R-mediated phagocytosis	T cell receptor signaling pathway
WufuImmune150	K06053	recombining binding protein suppressor of hairless	Th1 and Th2 cell differentiation
WufuImmune151	K03018	DNA-directed RNA polymerase III subunit RPC1 EC:2.7.7.6	Cytosolic DNA-sensing pathway
WufuImmune152	K09565	peptidyl-prolyl isomerase F (cyclophilin D) [[EC:5.2.1.8]]	Neutrophil extracellular trap formation
WufuImmune153	K07293	tyrosine-protein phosphatase non-receptor type 11 [[EC:3.1.3.48]]	Leukocyte transendothelial migration	Natural killer cell mediated cytotoxicity	C-type lectin receptor signaling pathway
WufuImmune154	K07364	tyrosine-protein kinase Tec [EC:2.7.10.2]	T cell receptor signaling pathway
WufuImmune155	K11974	E3 ubiquitin-protein ligase RNF31 EC:2.3.2.31	Toll-like receptor signaling pathway	Platelet activation
WufuImmune156	K04404	TAK1-binding protein 2	IL-17 signaling pathway	NOD-like receptor signaling pathway	Toll-like receptor signaling pathway	Toll and Imd signaling pathway
WufuImmune157	K08042	adenylate cyclase 2 [EC:4.6.1.1]	Chemokine signaling pathway
WufuImmune158	K05758	actin related protein 2/3 complex subunit 2	Fc gamma R-mediated phagocytosis
WufuImmune159	K01080	phosphatidate phosphatase EC:3.1.3.4	Fc gamma R-mediated phagocytosis
WufuImmune160	K11594	ATP-dependent RNA helicase DDX3X EC:3.6.4.13	RIG-I-like receptor signaling pathway
WufuImmune161	K11594	ATP-dependent RNA helicase DDX3X EC:3.6.4.13	RIG-I-like receptor signaling pathway
WufuImmune162	K00910	beta-adrenergic-receptor kinase [[[EC:2.7.11.1]5]]	Chemokine signaling pathway
WufuImmune163	K07830	Ras-related protein R-Ras2	C-type lectin receptor signaling pathway
WufuImmune164	K12654	transmembrane protein 173	Cytosolic DNA-sensing pathway	RIG-I-like receptor signaling pathway	NOD-like receptor signaling pathway
WufuImmune165	K06630	14-3-3 protein epsilon	NOD-like receptor signaling pathway
WufuImmune166	K05012	chloride channel 3/4/5	Neutrophil extracellular trap formation
WufuImmune167	K04392	Ras-related C3 botulinum toxin substrate 1	Chemokine signaling pathway	Intestinal immune network for IgA production	Leukocyte transendothelial migration	Fc gamma R-mediated phagocytosis	Fc epsilon RI signaling pathway	B cell receptor signaling pathway	Natural killer cell mediated cytotoxicity	Toll-like receptor signaling pathway	Neutrophil extracellular trap formation
WufuImmune168	K11140	aminopeptidase N [EC:3.4.11.2]	Hematopoietic cell lineage
WufuImmune169	K12562	amphiphysin	Fc gamma R-mediated phagocytosis
WufuImmune170	K04634	guanine nucleotide-binding protein G(q) subunit alpha	Chemokine signaling pathway	Platelet activation
WufuImmune171	K09408	forkhead box protein O3	Chemokine signaling pathway
WufuImmune172	K01344	protein C (activated) [EC:3.4.21.69]	Complement and coagulation cascades
WufuImmune173	K03007	DNA-directed RNA polymerases I, II, and III subunit RPABC5	Cytosolic DNA-sensing pathway
WufuImmune174	K04441	p38 MAP kinase [EC:2.7.11.24]	Leukocyte transendothelial migration	Fc epsilon RI signaling pathway	IL-17 signaling pathway	Th17 cell differentiation	Th1 and Th2 cell differentiation	T cell receptor signaling pathway	C-type lectin receptor signaling pathway	RIG-I-like receptor signaling pathway	NOD-like receptor signaling pathway	Toll-like receptor signaling pathway	Toll and Imd signaling pathway	Neutrophil extracellular trap formation	Platelet activation
WufuImmune175	K05760	paxillin	Chemokine signaling pathway	Leukocyte transendothelial migration
WufuImmune176	K04447	Janus kinase 2 [EC:2.7.10.2]	Chemokine signaling pathway	Th17 cell differentiation	Th1 and Th2 cell differentiation
WufuImmune177	K06508	CD81 antigen	B cell receptor signaling pathway
WufuImmune178	K10802	high mobility group protein B1	Neutrophil extracellular trap formation
WufuImmune179	K04539	guanine nucleotide-binding protein subunit beta-5	Chemokine signaling pathway
WufuImmune180	K04368	mitogen-activated protein kinase kinase 1 [EC:2.7.12.2]	Chemokine signaling pathway	Fc gamma R-mediated phagocytosis	Fc epsilon RI signaling pathway	B cell receptor signaling pathway	Neutrophil extracellular trap formation
WufuImmune181	K03352	anaphase-promoting complex subunit 5	B cell receptor signaling pathway	IL-17 signaling pathway
WufuImmune182	K04688	ribosomal protein S6 kinase beta [EC:2.7.11.1]	Fc gamma R-mediated phagocytosis
WufuImmune183	K18584	actin-related protein 3	Fc gamma R-mediated phagocytosis
WufuImmune184	K05754	actin related protein 2/3 complex subunit 5	Fc gamma R-mediated phagocytosis
WufuImmune185	K11864	BRCA1/BRCA2-containing complex subunit 3 EC:3.4.19.-	NOD-like receptor signaling pathway
WufuImmune186	K02183	calmodulin	C-type lectin receptor signaling pathway
WufuImmune187	K02105	catenin beta 1	Leukocyte transendothelial migration
WufuImmune188	K08048	adenylate cyclase 8 [EC:4.6.1.1]	Chemokine signaling pathway	Platelet activation
WufuImmune189	K01365	cathepsin L EC:3.4.22.15	Antigen processing and presentation	RIG-I-like receptor signaling pathway
WufuImmune190	K08336	ubiquitin-like protein ATG12	RIG-I-like receptor signaling pathway	NOD-like receptor signaling pathway
WufuImmune191	K08059	interferon gamma-inducible protein 30	Antigen processing and presentation
WufuImmune192	K08054	calnexin	Antigen processing and presentation
WufuImmune193	K03020	DNA-directed RNA polymerases I and III subunit RPAC2	Cytosolic DNA-sensing pathway
WufuImmune194	K05702	afadin	Leukocyte transendothelial migration
WufuImmune195	K04432	mitogen-activated protein kinase kinase 3 [EC:2.7.12.2]	Fc epsilon RI signaling pathway	Toll-like receptor signaling pathway	Toll and Imd signaling pathway
WufuImmune196	K04392	Ras-related C3 botulinum toxin substrate 1	Chemokine signaling pathway	Intestinal immune network for IgA production	Leukocyte transendothelial migration	Fc gamma R-mediated phagocytosis	Fc epsilon RI signaling pathway	B cell receptor signaling pathway	Natural killer cell mediated cytotoxicity	Toll-like receptor signaling pathway	Neutrophil extracellular trap formation
WufuImmune197	K12795	suppressor of G2 allele of SKP1	NOD-like receptor signaling pathway
WufuImmune198	K01080	phosphatidate phosphatase EC:3.1.3.4	Fc gamma R-mediated phagocytosis
WufuImmune199	K07209	inhibitor of nuclear factor kappa-B kinase subunit beta [EC:2.7.11.1]0	Chemokine signaling pathway	B cell receptor signaling pathway	Th17 cell differentiation	Th1 and Th2 cell differentiation	T cell receptor signaling pathway	C-type lectin receptor signaling pathway	Cytosolic DNA-sensing pathway	RIG-I-like receptor signaling pathway	NOD-like receptor signaling pathway	Toll-like receptor signaling pathway	Toll and Imd signaling pathway
WufuImmune200	K03009	DNA-directed RNA polymerases I, II, and III subunit RPABC4	Cytosolic DNA-sensing pathway
WufuImmune201	K04393	cell division control protein 42	Chemokine signaling pathway	Leukocyte transendothelial migration	Fc gamma R-mediated phagocytosis	T cell receptor signaling pathway
WufuImmune202	K09565	peptidyl-prolyl isomerase F (cyclophilin D) [[EC:5.2.1.8]]	Neutrophil extracellular trap formation
WufuImmune203	K12076	disks large protein 1	T cell receptor signaling pathway
WufuImmune204	K23691	serine/threonine-protein kinase N2 [EC:2.7.11.1]3	NOD-like receptor signaling pathway
WufuImmune205	K08043	adenylate cyclase 3 [EC:4.6.1.1]	Chemokine signaling pathway	Platelet activation
WufuImmune206	K09093	aryl hydrocarbon receptor	Th17 cell differentiation
WufuImmune207	K03023	DNA-directed RNA polymerase III subunit RPC3	Cytosolic DNA-sensing pathway
WufuImmune208	K03016	DNA-directed RNA polymerases I, II, and III subunit RPABC3	Cytosolic DNA-sensing pathway
WufuImmune209	K20915	tumor suppressor p53-binding protein 1	Toll-like receptor signaling pathway
WufuImmune210	K10630	RanBP-type and C3HC4-type zinc finger-containing protein 1 EC:2.3.2.31	Toll-like receptor signaling pathway
Korea
ID	K0	product	Pathway
KoreaImmune1	K08042	adenylate cyclase 2 [EC:4.6.1.1]	Chemokine signaling pathway
KoreaImmune2	K04439	beta-arrestin	Chemokine signaling pathway
KoreaImmune3	K01344	protein C (activated) [EC:3.4.21.69]	Complement and coagulation cascades
KoreaImmune4	K00922	phosphatidylinositol-45-bisphosphate 3-kinase catalytic subunit alpha/beta/delta [EC:2.7.1.153]	Chemokine signaling pathway	Intestinal immune network for IgA production	Leukocyte transendothelial migration	Fc gamma R-mediated phagocytosis	Fc epsilon RI signaling pathway	B cell receptor signaling pathway	T cell receptor signaling pathway	Natural killer cell mediated cytotoxicity	C-type lectin receptor signaling pathway	Toll-like receptor signaling pathway	Neutrophil extracellular trap formation	Platelet activation
KoreaImmune5	K02677	classical protein kinase C alpha type [EC:2.7.11.1]3	Intestinal immune network for IgA production	Leukocyte transendothelial migration	Fc gamma R-mediated phagocytosis	Fc epsilon RI signaling pathway	Natural killer cell mediated cytotoxicity	Neutrophil extracellular trap formation
KoreaImmune6	K05699	actinin alpha 1/4	Intestinal immune network for IgA production	Leukocyte transendothelial migration
KoreaImmune7	K04392	Ras-related C3 botulinum toxin substrate 1	Chemokine signaling pathway	Intestinal immune network for IgA production	Leukocyte transendothelial migration	Fc gamma R-mediated phagocytosis	Fc epsilon RI signaling pathway	B cell receptor signaling pathway	Natural killer cell mediated cytotoxicity	Toll-like receptor signaling pathway	Neutrophil extracellular trap formation
KoreaImmune8	K05012	chloride channel 3/4/5	Neutrophil extracellular trap formation
KoreaImmune9	K03019	DNA-directed RNA polymerase III subunit RPC11	Cytosolic DNA-sensing pathway
KoreaImmune10	K08054	calnexin	Antigen processing and presentation
KoreaImmune11	K03020	DNA-directed RNA polymerases I and III subunit RPAC2	Cytosolic DNA-sensing pathway
KoreaImmune12	K18584	actin-related protein 3	Fc gamma R-mediated phagocytosis
KoreaImmune13	K06053	recombining binding protein suppressor of hairless	Th1 and Th2 cell differentiation
KoreaImmune14	K04393	cell division control protein 42	Chemokine signaling pathway	Leukocyte transendothelial migration	Fc gamma R-mediated phagocytosis	T cell receptor signaling pathway
KoreaImmune15	K07831	Ras-related protein M-Ras	C-type lectin receptor signaling pathway
KoreaImmune16	K06279	SHC-transforming protein 1	Chemokine signaling pathway	Natural killer cell mediated cytotoxicity
KoreaImmune17	K11224	signal transducer and activator of transcription 5B	Chemokine signaling pathway	Th17 cell differentiation	Th1 and Th2 cell differentiation
KoreaImmune18	K05858	phosphatidylinositol phospholipase C beta [EC:3.1.4.11]	Chemokine signaling pathway	NOD-like receptor signaling pathway	Neutrophil extracellular trap formation	Platelet activation
KoreaImmune19	K04734	NF-kappa-B inhibitor alpha	Chemokine signaling pathway	B cell receptor signaling pathway	IL-17 signaling pathway	Th17 cell differentiation	Th1 and Th2 cell differentiation	T cell receptor signaling pathway	C-type lectin receptor signaling pathway	Cytosolic DNA-sensing pathway	RIG-I-like receptor signaling pathway	NOD-like receptor signaling pathway	Toll-like receptor signaling pathway	Toll and Imd signaling pathway
KoreaImmune20	K05756	actin related protein 2/3 complex subunit 3	Fc gamma R-mediated phagocytosis
KoreaImmune21	K12890	splicing factor arginine/serine-rich 1	IL-17 signaling pathway
KoreaImmune22	K08057	calreticulin	Antigen processing and presentation
KoreaImmune23	K11254	histone H4	Neutrophil extracellular trap formation
KoreaImmune24	K11254	histone H4	Neutrophil extracellular trap formation
KoreaImmune25	K11252	histone H2B	Neutrophil extracellular trap formation
KoreaImmune26	K11254	histone H4	Neutrophil extracellular trap formation
KoreaImmune27	K11252	histone H2B	Neutrophil extracellular trap formation
KoreaImmune28	K04630	guanine nucleotide-binding protein G(i) subunit alpha	Chemokine signaling pathway	Leukocyte transendothelial migration	Platelet activation
KoreaImmune29	K08056	protein disulfide-isomerase A3 [EC:5.3.4.1]	NOD-like receptor signaling pathway
KoreaImmune30	K16060	baculoviral IAP repeat-containing protein 2/3	Toll-like receptor signaling pathway	Toll and Imd signaling pathway
KoreaImmune31	K17065	dynamin 1-like protein [EC:3.6.5.5]	NOD-like receptor signaling pathway
KoreaImmune32	K02373	FAS-associated death domain protein	IL-17 signaling pathway	RIG-I-like receptor signaling pathway	NOD-like receptor signaling pathway	Toll-like receptor signaling pathway	Toll and Imd signaling pathway
KoreaImmune33	K20858	calcium uniporter protein mitochondrial	NOD-like receptor signaling pathway
KoreaImmune34	K08059	interferon gamma-inducible protein 30	Antigen processing and presentation
KoreaImmune35	K09487	heat shock protein 90kDa beta	IL-17 signaling pathway
KoreaImmune36	K17890	autophagy-related protein 16-1	NOD-like receptor signaling pathway
KoreaImmune37	K06484	integrin alpha 5	Hematopoietic cell lineage
KoreaImmune38	K01116	phosphatidylinositol phospholipase C gamma-1 [EC:3.1.4.11]	Chemokine signaling pathway	Leukocyte transendothelial migration	Fc gamma R-mediated phagocytosis	Fc epsilon RI signaling pathway	Th17 cell differentiation	Th1 and Th2 cell differentiation	T cell receptor signaling pathway	Natural killer cell mediated cytotoxicity	Neutrophil extracellular trap formation
KoreaImmune39	K05719	integrin beta 1	Intestinal immune network for IgA production	Leukocyte transendothelial migration	Platelet activation
KoreaImmune40	K05704	tyrosine-protein kinase Src [EC:2.7.10.2]	Chemokine signaling pathway	C-type lectin receptor signaling pathway	Neutrophil extracellular trap formation	Platelet activation
KoreaImmune41	K14721	DNA-directed RNA polymerase III subunit RPC5	Cytosolic DNA-sensing pathway
KoreaImmune42	K04547	guanine nucleotide-binding protein G(I)/G(S)/G(O) subunit gamma-13	Chemokine signaling pathway
KoreaImmune43	K07209	inhibitor of nuclear factor kappa-B kinase subunit beta [EC:2.7.11.1]0	Chemokine signaling pathway	B cell receptor signaling pathway	Th17 cell differentiation	Th1 and Th2 cell differentiation	T cell receptor signaling pathway	C-type lectin receptor signaling pathway	Cytosolic DNA-sensing pathway	RIG-I-like receptor signaling pathway	NOD-like receptor signaling pathway	Toll-like receptor signaling pathway	Toll and Imd signaling pathway
KoreaImmune44	K09848	TNF receptor-associated factor 4	IL-17 signaling pathway
KoreaImmune45	K08336	ubiquitin-like protein ATG12	RIG-I-like receptor signaling pathway	NOD-like receptor signaling pathway
KoreaImmune46	K04441	p38 MAP kinase [EC:2.7.11.24]	Leukocyte transendothelial migration	Fc epsilon RI signaling pathway	IL-17 signaling pathway	Th17 cell differentiation	Th1 and Th2 cell differentiation	T cell receptor signaling pathway	C-type lectin receptor signaling pathway	RIG-I-like receptor signaling pathway	NOD-like receptor signaling pathway	Toll-like receptor signaling pathway	Toll and Imd signaling pathway	Neutrophil extracellular trap formation	Platelet activation
KoreaImmune47	K04079	molecular chaperone HtpG	IL-17 signaling pathway	Th17 cell differentiation	Antigen processing and presentation	NOD-like receptor signaling pathway
KoreaImmune48	K08048	adenylate cyclase 8 [EC:4.6.1.1]	Chemokine signaling pathway	Platelet activation
KoreaImmune49	K11140	aminopeptidase N [EC:3.4.11.2]	Hematopoietic cell lineage
KoreaImmune50	K12562	amphiphysin	Fc gamma R-mediated phagocytosis
KoreaImmune51	K09408	forkhead box protein O3	Chemokine signaling pathway
KoreaImmune52	K12795	suppressor of G2 allele of SKP1	NOD-like receptor signaling pathway
KoreaImmune53	K09093	aryl hydrocarbon receptor	Th17 cell differentiation
KoreaImmune54	K00889	1-phosphatidylinositol-4-phosphate 5-kinase [EC:2.7.1.68]	Fc gamma R-mediated phagocytosis
KoreaImmune55	K02649	phosphoinositide-3-kinase regulatory subunit alpha/beta/delta	Chemokine signaling pathway	Leukocyte transendothelial migration	Fc gamma R-mediated phagocytosis	Fc epsilon RI signaling pathway	B cell receptor signaling pathway	T cell receptor signaling pathway	Natural killer cell mediated cytotoxicity	C-type lectin receptor signaling pathway	Neutrophil extracellular trap formation	Platelet activation
KoreaImmune56	K03023	DNA-directed RNA polymerase III subunit RPC3	Cytosolic DNA-sensing pathway
KoreaImmune57	K05754	actin related protein 2/3 complex subunit 5	Fc gamma R-mediated phagocytosis
KoreaImmune58	K11864	BRCA1/BRCA2-containing complex subunit 3 EC:3.4.19.-	NOD-like receptor signaling pathway
KoreaImmune59	K09565	peptidyl-prolyl isomerase F (cyclophilin D) [[EC:5.2.1.8]]	Neutrophil extracellular trap formation
KoreaImmune60	K04393	cell division control protein 42	Chemokine signaling pathway	Leukocyte transendothelial migration	Fc gamma R-mediated phagocytosis	T cell receptor signaling pathway
KoreaImmune61	K06630	14-3-3 protein epsilon	NOD-like receptor signaling pathway
KoreaImmune62	K03025	DNA-directed RNA polymerase III subunit RPC6	Cytosolic DNA-sensing pathway
KoreaImmune63	K05863	solute carrier family 25 (mitochondrial adenine nucleotide translocator),member 4/5/6/31	Neutrophil extracellular trap formation
KoreaImmune64	K04513	Ras homolog gene family,member A	Chemokine signaling pathway	Leukocyte transendothelial migration	C-type lectin receptor signaling pathway	NOD-like receptor signaling pathway	Platelet activation
KoreaImmune65	K04392	Ras-related C3 botulinum toxin substrate 1	Chemokine signaling pathway	Intestinal immune network for IgA production	Leukocyte transendothelial migration	Fc gamma R-mediated phagocytosis	Fc epsilon RI signaling pathway	B cell receptor signaling pathway	Natural killer cell mediated cytotoxicity	Toll-like receptor signaling pathway	Neutrophil extracellular trap formation
KoreaImmune66	K03283	heat shock 70kDa protein 1/2/6/8	Antigen processing and presentation
KoreaImmune67	K08066	nuclear transcription factor Y gamma	Antigen processing and presentation
KoreaImmune68	K03175	TNF receptor-associated factor 6 EC:2.3.2.27	IL-17 signaling pathway	RIG-I-like receptor signaling pathway	Toll-like receptor signaling pathway
KoreaImmune69	K19862	NCK adaptor protein 2	T cell receptor signaling pathway
KoreaImmune70	K06276	3-phosphoinositide dependent protein kinase-1 [EC:2.7.11.1]	Fc epsilon RI signaling pathway
KoreaImmune71	K05719	integrin beta 1	Intestinal immune network for IgA production	Leukocyte transendothelial migration	Platelet activation
KoreaImmune72	K06051	delta	Th1 and Th2 cell differentiation
KoreaImmune73	K08601	ubiquitin carboxyl-terminal hydrolase CYLD [EC:3.4.19.12]	C-type lectin receptor signaling pathway	RIG-I-like receptor signaling pathway
KoreaImmune74	K08043	adenylate cyclase 3 [EC:4.6.1.1]	Chemokine signaling pathway	Platelet activation
KoreaImmune75	K12076	disks large protein 1	T cell receptor signaling pathway
KoreaImmune76	K13708	dedicator of cytokinesis protein 1	Fc gamma R-mediated phagocytosis
KoreaImmune77	K03013	DNA-directed RNA polymerases I, II, and III subunit RPABC1	Cytosolic DNA-sensing pathway
KoreaImmune78	K04364	growth factor receptor-bound protein 2	Chemokine signaling pathway	Fc epsilon RI signaling pathway	B cell receptor signaling pathway	T cell receptor signaling pathway	Natural killer cell mediated cytotoxicity
KoreaImmune79	K04456	RAC serine/threonine-protein kinase [EC:2.7.11.1]	Chemokine signaling pathway	Fc gamma R-mediated phagocytosis	Fc epsilon RI signaling pathway	B cell receptor signaling pathway	T cell receptor signaling pathway	C-type lectin receptor signaling pathway	Neutrophil extracellular trap formation	Platelet activation
KoreaImmune80	K06030	mitofusin 2 [EC:3.6.5.-]	NOD-like receptor signaling pathway
KoreaImmune81	K05755	actin related protein 2/3 complex subunit 4	Fc gamma R-mediated phagocytosis
KoreaImmune82	K20915	tumor suppressor p53-binding protein 1	Toll-like receptor signaling pathway
KoreaImmune83	K07941	ADP-ribosylation factor 6	Fc gamma R-mediated phagocytosis
KoreaImmune84	K06268	serine/threonine-protein phosphatase 2B regulatory subunit	B cell receptor signaling pathway	Th17 cell differentiation	Th1 and Th2 cell differentiation	T cell receptor signaling pathway	Natural killer cell mediated cytotoxicity	C-type lectin receptor signaling pathway
KoreaImmune85	K07203	serine/threonine-protein kinase mTOR [EC:2.7.11.1]	Th17 cell differentiation	Toll and Imd signaling pathway
KoreaImmune86	K04734	NF-kappa-B inhibitor alpha	Chemokine signaling pathway	B cell receptor signaling pathway	IL-17 signaling pathway	Th17 cell differentiation	Th1 and Th2 cell differentiation	T cell receptor signaling pathway	C-type lectin receptor signaling pathway	Cytosolic DNA-sensing pathway	RIG-I-like receptor signaling pathway	NOD-like receptor signaling pathway	Toll-like receptor signaling pathway	Toll and Imd signaling pathway
KoreaImmune87	K19603	mitogen-activated protein kinase 15 [EC:2.7.11.24]	B cell receptor signaling pathway
KoreaImmune88	K10630	RanBP-type and C3HC4-type zinc finger-containing protein 1 EC:2.3.2.31	Toll-like receptor signaling pathway
KoreaImmune89	K05691	catenin alpha	Leukocyte transendothelial migration
KoreaImmune90	K03283	heat shock 70kDa protein 1/2/6/8	Antigen processing and presentation
KoreaImmune91	K08064	nuclear transcription factor Y alpha	Antigen processing and presentation
KoreaImmune92	K01115	phospholipase D1/2 [EC:3.1.4.4]	Fc gamma R-mediated phagocytosis
KoreaImmune93	K04718	sphingosine kinase [EC:2.7.1.91]	Fc gamma R-mediated phagocytosis
KoreaImmune94	K03009	DNA-directed RNA polymerases I, II, and III subunit RPABC4	Cytosolic DNA-sensing pathway
KoreaImmune95	K04440	mitogen-activated protein kinase 8/9/10 (c-Jun N-terminal kinase) [EC:2.7.11.24]	Fc epsilon RI signaling pathway	IL-17 signaling pathway	Th17 cell differentiation	Th1 and Th2 cell differentiation	T cell receptor signaling pathway	C-type lectin receptor signaling pathway	RIG-I-like receptor signaling pathway	NOD-like receptor signaling pathway	Toll-like receptor signaling pathway	Toll and Imd signaling pathway
KoreaImmune96	K04365	B-Raf proto-oncogene serine/threonine-protein kinase [EC:2.7.11.1]	Chemokine signaling pathway	Natural killer cell mediated cytotoxicity
KoreaImmune97	K09490	endoplasmic reticulum chaperone BiP [EC:3.6.4.10]	Antigen processing and presentation
KoreaImmune98	K04431	mitogen-activated protein kinase kinase 7 [EC:2.7.12.2]	Fc epsilon RI signaling pathway	T cell receptor signaling pathway	Toll-like receptor signaling pathway	Toll and Imd signaling pathway
KoreaImmune99	K05730	guanine nucleotide exchange factor VAV	Chemokine signaling pathway	Leukocyte transendothelial migration	Fc gamma R-mediated phagocytosis	Fc epsilon RI signaling pathway	B cell receptor signaling pathway	T cell receptor signaling pathway	Natural killer cell mediated cytotoxicity
KoreaImmune100	K08339	autophagy-related protein 5	RIG-I-like receptor signaling pathway	NOD-like receptor signaling pathway
KoreaImmune101	K12757	myosin regulatory light chain 12	Intestinal immune network for IgA production	Leukocyte transendothelial migration	Platelet activation
KoreaImmune102	K04729	myeloid differentiation primary response protein MyD88	NOD-like receptor signaling pathway	Toll-like receptor signaling pathway	Toll and Imd signaling pathway
KoreaImmune103	K04371	mitogen-activated protein kinase 1/3 [EC:2.7.11.24]	Chemokine signaling pathway	Fc gamma R-mediated phagocytosis	Fc epsilon RI signaling pathway	IL-17 signaling pathway	Th17 cell differentiation	Th1 and Th2 cell differentiation	T cell receptor signaling pathway	Natural killer cell mediated cytotoxicity	C-type lectin receptor signaling pathway	NOD-like receptor signaling pathway	Toll-like receptor signaling pathway	Neutrophil extracellular trap formation	Platelet activation
KoreaImmune104	K04430	mitogen-activated protein kinase kinase 4 [EC:2.7.12.2]	Fc epsilon RI signaling pathway	Toll-like receptor signaling pathway
KoreaImmune105	K00863	triose/dihydroxyacetone kinase / FAD-AMP lyase (cyclizing) [[EC:2.7.1.28 2.7.1.29 4.6.1.15]]	RIG-I-like receptor signaling pathway
KoreaImmune106	K04448	transcription factor AP-1	B cell receptor signaling pathway	IL-17 signaling pathway	Th17 cell differentiation	Th1 and Th2 cell differentiation	T cell receptor signaling pathway	C-type lectin receptor signaling pathway	NOD-like receptor signaling pathway	Toll and Imd signaling pathway
KoreaImmune107	K04345	protein kinase A [EC:2.7.11.1]1	Platelet activation
KoreaImmune108	K11303	histone acetyltransferase 1 [EC:2.3.1.48]	Neutrophil extracellular trap formation
KoreaImmune109	K06052	jagged-1	Th1 and Th2 cell differentiation
KoreaImmune110	K18050	novel protein kinase C epsilon type [EC:2.7.11.1]3	Fc gamma R-mediated phagocytosis
KoreaImmune111	K03016	DNA-directed RNA polymerases I, II, and III subunit RPABC3	Cytosolic DNA-sensing pathway
KoreaImmune112	K04353	Ras-related protein Rap-1A	Chemokine signaling pathway	Leukocyte transendothelial migration	Platelet activation
KoreaImmune113	K05719	integrin beta 1	Intestinal immune network for IgA production	Leukocyte transendothelial migration	Platelet activation
KoreaImmune114	K08049	adenylate cyclase 9 [EC:4.6.1.1]	Chemokine signaling pathway	Platelet activation
KoreaImmune115	K04447	Janus kinase 2 [EC:2.7.10.2]	Chemokine signaling pathway	Th17 cell differentiation	Th1 and Th2 cell differentiation
KoreaImmune116	K06508	CD81 antigen	B cell receptor signaling pathway
KoreaImmune117	K05760	paxillin	Chemokine signaling pathway	Leukocyte transendothelial migration
KoreaImmune118	K04403	TAK1-binding protein 1	NOD-like receptor signaling pathway	Toll-like receptor signaling pathway
KoreaImmune119	K06508	CD81 antigen	B cell receptor signaling pathway
KoreaImmune120	K04008	CD59 antigen	Complement and coagulation cascades	Hematopoietic cell lineage
KoreaImmune121	K08291	G protein-coupled receptor kinase [[[EC:2.7.11.1]6]]	Chemokine signaling pathway
KoreaImmune122	K23691	serine/threonine-protein kinase N2 [EC:2.7.11.1]3	NOD-like receptor signaling pathway
KoreaImmune123	K03352	anaphase-promoting complex subunit 5	B cell receptor signaling pathway	IL-17 signaling pathway
KoreaImmune124	K04536	guanine nucleotide-binding protein G(I)/G(S)/G(T) subunit beta-1	Chemokine signaling pathway
KoreaImmune125	K03014	DNA-directed RNA polymerases I, II, and III subunit RPABC2	Cytosolic DNA-sensing pathway
KoreaImmune126	K08341	GABA(A) receptor-associated protein	NOD-like receptor signaling pathway
KoreaImmune127	K00889	1-phosphatidylinositol-4-phosphate 5-kinase [EC:2.7.1.68]	Fc gamma R-mediated phagocytosis
KoreaImmune128	K03027	DNA-directed RNA polymerases I and III subunit RPAC1	Cytosolic DNA-sensing pathway
KoreaImmune129	K08059	interferon gamma-inducible protein 30	Antigen processing and presentation
KoreaImmune130	K02183	calmodulin	C-type lectin receptor signaling pathway
KoreaImmune131	K15040	voltage-dependent anion channel protein 2	NOD-like receptor signaling pathway	Neutrophil extracellular trap formation
KoreaImmune132	K12366	engulfment and cell motility protein 1	Chemokine signaling pathway
KoreaImmune133	K09578	peptidyl-prolyl cis-trans isomerase NIMA-interacting 1 [[EC:5.2.1.8]]	RIG-I-like receptor signaling pathway
KoreaImmune134	K05757	actin related protein 2/3 complex subunit 1A/1B	Fc gamma R-mediated phagocytosis
KoreaImmune135	K03022	DNA-directed RNA polymerase III subunit RPC8	Cytosolic DNA-sensing pathway
KoreaImmune136	K08065	nuclear transcription Y subunit beta	Antigen processing and presentation
KoreaImmune137	K11254	histone H4	Neutrophil extracellular trap formation
KoreaImmune138	K11252	histone H2B	Neutrophil extracellular trap formation
KoreaImmune139	K05692	actin beta/gamma 1	Intestinal immune network for IgA production	Leukocyte transendothelial migration	Neutrophil extracellular trap formation	Platelet activation
KoreaImmune140	K05863	solute carrier family 25 (mitochondrial adenine nucleotide translocator),member 4/5/6/31	Neutrophil extracellular trap formation
KoreaImmune141	K11140	aminopeptidase N [EC:3.4.11.2]	Hematopoietic cell lineage
KoreaImmune142	K11140	aminopeptidase N [EC:3.4.11.2]	Hematopoietic cell lineage
KoreaImmune143	K11140	aminopeptidase N [EC:3.4.11.2]	Hematopoietic cell lineage
KoreaImmune144	K05410	TANK-binding kinase 1 [EC:2.7.11.1]0	IL-17 signaling pathway	Cytosolic DNA-sensing pathway	RIG-I-like receptor signaling pathway	NOD-like receptor signaling pathway	Toll-like receptor signaling pathway
KoreaImmune145	K04079	molecular chaperone HtpG	IL-17 signaling pathway	Th17 cell differentiation	Antigen processing and presentation	NOD-like receptor signaling pathway
KoreaImmune146	K03026	DNA-directed RNA polymerase III subunit RPC4	Cytosolic DNA-sensing pathway
KoreaImmune147	K04674	TGF-beta receptor type-1 [EC:2.7.11.30]	IL-17 signaling pathway	Th17 cell differentiation
KoreaImmune148	K04398	caspase 8 [EC:3.4.22.61]	IL-17 signaling pathway	C-type lectin receptor signaling pathway	RIG-I-like receptor signaling pathway	Toll-like receptor signaling pathway	Toll and Imd signaling pathway
KoreaImmune149	K09035	transcription factor Maf	Th1 and Th2 cell differentiation
KoreaImmune150	K07830	Ras-related protein R-Ras2	C-type lectin receptor signaling pathway
KoreaImmune151	K12654	transmembrane protein 173	Cytosolic DNA-sensing pathway	RIG-I-like receptor signaling pathway	NOD-like receptor signaling pathway
KoreaImmune152	K07364	tyrosine-protein kinase Tec [EC:2.7.10.2]	T cell receptor signaling pathway
KoreaImmune153	K07293	tyrosine-protein phosphatase non-receptor type 11 [[EC:3.1.3.48]]	Leukocyte transendothelial migration	Natural killer cell mediated cytotoxicity	C-type lectin receptor signaling pathway
KoreaImmune154	K09565	peptidyl-prolyl isomerase F (cyclophilin D) [[EC:5.2.1.8]]	Neutrophil extracellular trap formation
KoreaImmune155	K01365	cathepsin L EC:3.4.22.15	Antigen processing and presentation	RIG-I-like receptor signaling pathway
KoreaImmune156	K05725	focal adhesion kinase 1 [EC:2.7.10.2]	Chemokine signaling pathway	Leukocyte transendothelial migration
KoreaImmune157	K07827	GTPase Kras	Chemokine signaling pathway	Fc epsilon RI signaling pathway	B cell receptor signaling pathway	IL-17 signaling pathway	T cell receptor signaling pathway	Natural killer cell mediated cytotoxicity	C-type lectin receptor signaling pathway
KoreaImmune158	K04404	TAK1-binding protein 2	IL-17 signaling pathway	NOD-like receptor signaling pathway	Toll-like receptor signaling pathway	Toll and Imd signaling pathway
KoreaImmune159	K03024	DNA-directed RNA polymerase III subunit RPC7	Cytosolic DNA-sensing pathway
KoreaImmune160	K11594	ATP-dependent RNA helicase DDX3X EC:3.6.4.13	RIG-I-like receptor signaling pathway
KoreaImmune161	K11594	ATP-dependent RNA helicase DDX3X EC:3.6.4.13	RIG-I-like receptor signaling pathway
KoreaImmune162	K03007	DNA-directed RNA polymerases I, II, and III subunit RPABC5	Cytosolic DNA-sensing pathway
KoreaImmune163	K08337	ubiquitin-like modifier-activating enzyme ATG7	Neutrophil extracellular trap formation
KoreaImmune164	K11252	histone H2B	Neutrophil extracellular trap formation
KoreaImmune165	K04688	ribosomal protein S6 kinase beta [EC:2.7.11.1]	Fc gamma R-mediated phagocytosis
KoreaImmune166	K04730	interleukin-1 receptor-associated kinase 1 [EC:2.7.11.1]	Toll-like receptor signaling pathway	Toll and Imd signaling pathway
KoreaImmune167	K17820	ATP-dependent RNA helicase DHX33 EC:3.6.4.13	Toll-like receptor signaling pathway
KoreaImmune168	K17260	actin-related protein 2	Fc gamma R-mediated phagocytosis
KoreaImmune169	K04438	C-crk adapter molecule crk	Chemokine signaling pathway	Fc gamma R-mediated phagocytosis
KoreaImmune170	K02183	calmodulin	C-type lectin receptor signaling pathway
KoreaImmune171	K04345	protein kinase A [EC:2.7.11.1]1	Platelet activation
KoreaImmune172	K05743	LIM domain kinase 1 [EC:2.7.11.1]	Fc gamma R-mediated phagocytosis
KoreaImmune173	K04501	mothers against decapentaplegic homolog 4	Th17 cell differentiation
KoreaImmune174	K04368	mitogen-activated protein kinase kinase 1 [EC:2.7.12.2]	Chemokine signaling pathway	Fc gamma R-mediated phagocytosis	Fc epsilon RI signaling pathway	B cell receptor signaling pathway	Neutrophil extracellular trap formation
KoreaImmune175	K04539	guanine nucleotide-binding protein subunit beta-5	Chemokine signaling pathway
KoreaImmune176	K06698	proteasome activator subunit 3 (PA28 gamma)	Antigen processing and presentation
KoreaImmune177	K02105	catenin beta 1	Leukocyte transendothelial migration
KoreaImmune178	K05765	cofilin	Fc gamma R-mediated phagocytosis
KoreaImmune179	K07369	mucosa-associated lymphoid tissue lymphoma translocation protein 1 EC:3.4.22.-	B cell receptor signaling pathway	T cell receptor signaling pathway	C-type lectin receptor signaling pathway
KoreaImmune180	K12655	OTU domain-containing protein 5 [EC:3.4.19.12]	RIG-I-like receptor signaling pathway
KoreaImmune181	K04409	p21-activated kinase 1 [EC:2.7.11.1]	Chemokine signaling pathway	Fc gamma R-mediated phagocytosis	T cell receptor signaling pathway	Natural killer cell mediated cytotoxicity	C-type lectin receptor signaling pathway
KoreaImmune182	K03018	DNA-directed RNA polymerase III subunit RPC1 EC:2.7.7.6	Cytosolic DNA-sensing pathway
KoreaImmune183	K05702	afadin	Leukocyte transendothelial migration
KoreaImmune184	K03099	son of sevenless	Chemokine signaling pathway	Fc epsilon RI signaling pathway	B cell receptor signaling pathway	T cell receptor signaling pathway	Natural killer cell mediated cytotoxicity
KoreaImmune185	K17388	Rho-associated protein kinase 2 [EC:2.7.11.1]	Chemokine signaling pathway	Leukocyte transendothelial migration	Platelet activation
KoreaImmune186	K01080	phosphatidate phosphatase EC:3.1.3.4	Fc gamma R-mediated phagocytosis
KoreaImmune187	K01080	phosphatidate phosphatase EC:3.1.3.4	Fc gamma R-mediated phagocytosis
KoreaImmune188	K11974	E3 ubiquitin-protein ligase RNF31 EC:2.3.2.31	Toll-like receptor signaling pathway	Platelet activation
KoreaImmune189	K04237	partitioning defective protein 3	Chemokine signaling pathway
KoreaImmune190	K11253	histone H3	Neutrophil extracellular trap formation
KoreaImmune191	K06083	WAS protein family,member 3	Fc gamma R-mediated phagocytosis
KoreaImmune192	K08045	adenylate cyclase 5 [EC:4.6.1.1]	Chemokine signaling pathway	Platelet activation
KoreaImmune193	K11406	histone deacetylase 4/5 [EC:3.5.1.98]	Neutrophil extracellular trap formation
KoreaImmune194	K03083	glycogen synthase kinase 3 beta [EC:2.7.11.26]	B cell receptor signaling pathway	T cell receptor signaling pathway
KoreaImmune195	K04634	guanine nucleotide-binding protein G(q) subunit alpha	Chemokine signaling pathway	Platelet activation
KoreaImmune196	K04348	serine/threonine-protein phosphatase 2B catalytic subunit [EC:3.1.3.16]	B cell receptor signaling pathway	Th17 cell differentiation	Th1 and Th2 cell differentiation	T cell receptor signaling pathway	Natural killer cell mediated cytotoxicity	C-type lectin receptor signaling pathway
KoreaImmune197	K05758	actin related protein 2/3 complex subunit 2	Fc gamma R-mediated phagocytosis
KoreaImmune198	K04427	mitogen-activated protein kinase kinase kinase 7 EC:2.7.11.25	IL-17 signaling pathway	T cell receptor signaling pathway	RIG-I-like receptor signaling pathway	NOD-like receptor signaling pathway	Toll-like receptor signaling pathway	Toll and Imd signaling pathway	Neutrophil extracellular trap formation
KoreaImmune199	K10802	high mobility group protein B1	Neutrophil extracellular trap formation
KoreaImmune200	K02580	nuclear factor NF-kappa-B p105 subunit	Chemokine signaling pathway	B cell receptor signaling pathway	IL-17 signaling pathway	Th17 cell differentiation	Th1 and Th2 cell differentiation	T cell receptor signaling pathway	C-type lectin receptor signaling pathway	Cytosolic DNA-sensing pathway	RIG-I-like receptor signaling pathway	NOD-like receptor signaling pathway	Toll-like receptor signaling pathway
KoreaImmune201	K06067	histone deacetylase 1/2 [EC:3.5.1.98]	Neutrophil extracellular trap formation
KoreaImmune202	K00910	beta-adrenergic-receptor kinase [[[EC:2.7.11.1]5]]	Chemokine signaling pathway
KoreaImmune203	K07532	Rho guanine nucleotide exchange factor 12	C-type lectin receptor signaling pathway
KoreaImmune204	K04432	mitogen-activated protein kinase kinase 3 [EC:2.7.12.2]	Fc epsilon RI signaling pathway	Toll-like receptor signaling pathway	Toll and Imd signaling pathway
KoreaImmune205	K06061	mastermind	Th1 and Th2 cell differentiation
KoreaImmune206	K05700	vinculin	Leukocyte transendothelial migration
KoreaImmune207	K11404	histone deacetylase 3 [EC:3.5.1.98]	Neutrophil extracellular trap formation
Baisha
ID	K0	product	Pathway
BaishaImmune1	K18584	actin-related protein 3	Fc gamma R-mediated phagocytosis
BaishaImmune2	K04688	ribosomal protein S6 kinase beta [EC:2.7.11.1]	Fc gamma R-mediated phagocytosis
BaishaImmune3	K11252	histone H2B	Neutrophil extracellular trap formation
BaishaImmune4	K03007	DNA-directed RNA polymerases I, II, and III subunit RPABC5	Cytosolic DNA-sensing pathway
BaishaImmune5	K04393	cell division control protein 42	Chemokine signaling pathway	Leukocyte transendothelial migration	Fc gamma R-mediated phagocytosis	T cell receptor signaling pathway
BaishaImmune6	K09565	peptidyl-prolyl isomerase F (cyclophilin D) [[EC:5.2.1.8]]	Neutrophil extracellular trap formation
BaishaImmune7	K17065	dynamin 1-like protein [EC:3.6.5.5]	NOD-like receptor signaling pathway
BaishaImmune8	K16060	baculoviral IAP repeat-containing protein 2/3	Toll-like receptor signaling pathway	Toll and Imd signaling pathway
BaishaImmune9	K08056	protein disulfide-isomerase A3 [EC:5.3.4.1]	NOD-like receptor signaling pathway
BaishaImmune10	K04513	Ras homolog gene family,member A	Chemokine signaling pathway	Leukocyte transendothelial migration	C-type lectin receptor signaling pathway	NOD-like receptor signaling pathway	Platelet activation
BaishaImmune11	K04630	guanine nucleotide-binding protein G(i) subunit alpha	Chemokine signaling pathway	Leukocyte transendothelial migration	Platelet activation
BaishaImmune12	K03024	DNA-directed RNA polymerase III subunit RPC7	Cytosolic DNA-sensing pathway
BaishaImmune13	K11252	histone H2B	Neutrophil extracellular trap formation
BaishaImmune14	K11254	histone H4	Neutrophil extracellular trap formation
BaishaImmune15	K11252	histone H2B	Neutrophil extracellular trap formation
BaishaImmune16	K11254	histone H4	Neutrophil extracellular trap formation
BaishaImmune17	K11253	histone H3	Neutrophil extracellular trap formation
BaishaImmune18	K11254	histone H4	Neutrophil extracellular trap formation
BaishaImmune19	K11253	histone H3	Neutrophil extracellular trap formation
BaishaImmune20	K11253	histone H3	Neutrophil extracellular trap formation
BaishaImmune21	K00889	1-phosphatidylinositol-4-phosphate 5-kinase [EC:2.7.1.68]	Fc gamma R-mediated phagocytosis
BaishaImmune22	K02649	phosphoinositide-3-kinase regulatory subunit alpha/beta/delta	Chemokine signaling pathway	Leukocyte transendothelial migration	Fc gamma R-mediated phagocytosis	Fc epsilon RI signaling pathway	B cell receptor signaling pathway	T cell receptor signaling pathway	Natural killer cell mediated cytotoxicity	C-type lectin receptor signaling pathway	Neutrophil extracellular trap formation	Platelet activation
BaishaImmune23	K05719	integrin beta 1	Intestinal immune network for IgA production	Leukocyte transendothelial migration	Platelet activation
BaishaImmune24	K04079	molecular chaperone HtpG	IL-17 signaling pathway	Th17 cell differentiation	Antigen processing and presentation	NOD-like receptor signaling pathway
BaishaImmune25	K04345	protein kinase A [EC:2.7.11.1]1	Platelet activation
BaishaImmune26	K17260	actin-related protein 2	Fc gamma R-mediated phagocytosis
BaishaImmune27	K17388	Rho-associated protein kinase 2 [EC:2.7.11.1]	Chemokine signaling pathway	Leukocyte transendothelial migration	Platelet activation
BaishaImmune28	K17820	ATP-dependent RNA helicase DHX33 EC:3.6.4.13	Toll-like receptor signaling pathway
BaishaImmune29	K19862	NCK adaptor protein 2	T cell receptor signaling pathway
BaishaImmune30	K03175	TNF receptor-associated factor 6 EC:2.3.2.27	IL-17 signaling pathway	RIG-I-like receptor signaling pathway	Toll-like receptor signaling pathway
BaishaImmune31	K08066	nuclear transcription factor Y gamma	Antigen processing and presentation
BaishaImmune32	K03283	heat shock 70kDa protein 1/2/6/8	Antigen processing and presentation
BaishaImmune33	K06276	3-phosphoinositide dependent protein kinase-1 [EC:2.7.11.1]	Fc epsilon RI signaling pathway
BaishaImmune34	K04539	guanine nucleotide-binding protein subunit beta-5	Chemokine signaling pathway
BaishaImmune35	K04368	mitogen-activated protein kinase kinase 1 [EC:2.7.12.2]	Chemokine signaling pathway	Fc gamma R-mediated phagocytosis	Fc epsilon RI signaling pathway	B cell receptor signaling pathway	Neutrophil extracellular trap formation
BaishaImmune36	K06067	histone deacetylase 1/2 [EC:3.5.1.98]	Neutrophil extracellular trap formation
BaishaImmune37	K04448	transcription factor AP-1	B cell receptor signaling pathway	IL-17 signaling pathway	Th17 cell differentiation	Th1 and Th2 cell differentiation	T cell receptor signaling pathway	C-type lectin receptor signaling pathway	NOD-like receptor signaling pathway	Toll and Imd signaling pathway
BaishaImmune38	K03083	glycogen synthase kinase 3 beta [EC:2.7.11.26]	B cell receptor signaling pathway	T cell receptor signaling pathway
BaishaImmune39	K04392	Ras-related C3 botulinum toxin substrate 1	Chemokine signaling pathway	Intestinal immune network for IgA production	Leukocyte transendothelial migration	Fc gamma R-mediated phagocytosis	Fc epsilon RI signaling pathway	B cell receptor signaling pathway	Natural killer cell mediated cytotoxicity	Toll-like receptor signaling pathway	Neutrophil extracellular trap formation
BaishaImmune40	K05012	chloride channel 3/4/5	Neutrophil extracellular trap formation
BaishaImmune41	K01344	protein C (activated) [EC:3.4.21.69]	Complement and coagulation cascades
BaishaImmune42	K17890	autophagy-related protein 16-1	NOD-like receptor signaling pathway
BaishaImmune43	K08042	adenylate cyclase 2 [EC:4.6.1.1]	Chemokine signaling pathway
BaishaImmune44	K04439	beta-arrestin	Chemokine signaling pathway
BaishaImmune45	K05858	phosphatidylinositol phospholipase C beta [EC:3.1.4.11]	Chemokine signaling pathway	NOD-like receptor signaling pathway	Neutrophil extracellular trap formation	Platelet activation
BaishaImmune46	K20858	calcium uniporter protein mitochondrial	NOD-like receptor signaling pathway
BaishaImmune47	K02373	FAS-associated death domain protein	IL-17 signaling pathway	RIG-I-like receptor signaling pathway	NOD-like receptor signaling pathway	Toll-like receptor signaling pathway	Toll and Imd signaling pathway
BaishaImmune48	K03026	DNA-directed RNA polymerase III subunit RPC4	Cytosolic DNA-sensing pathway
BaishaImmune49	K01080	phosphatidate phosphatase EC:3.1.3.4	Fc gamma R-mediated phagocytosis
BaishaImmune50	K05758	actin related protein 2/3 complex subunit 2	Fc gamma R-mediated phagocytosis
BaishaImmune51	K11974	E3 ubiquitin-protein ligase RNF31 EC:2.3.2.31	Toll-like receptor signaling pathway	Platelet activation
BaishaImmune52	K08048	adenylate cyclase 8 [EC:4.6.1.1]	Chemokine signaling pathway	Platelet activation
BaishaImmune53	K11594	ATP-dependent RNA helicase DDX3X EC:3.6.4.13	RIG-I-like receptor signaling pathway
BaishaImmune54	K05704	tyrosine-protein kinase Src [EC:2.7.10.2]	Chemokine signaling pathway	C-type lectin receptor signaling pathway	Neutrophil extracellular trap formation	Platelet activation
BaishaImmune55	K11594	ATP-dependent RNA helicase DDX3X EC:3.6.4.13	RIG-I-like receptor signaling pathway
BaishaImmune56	K08336	ubiquitin-like protein ATG12	RIG-I-like receptor signaling pathway	NOD-like receptor signaling pathway
BaishaImmune57	K04404	TAK1-binding protein 2	IL-17 signaling pathway	NOD-like receptor signaling pathway	Toll-like receptor signaling pathway	Toll and Imd signaling pathway
BaishaImmune58	K08341	GABA(A) receptor-associated protein	NOD-like receptor signaling pathway
BaishaImmune59	K00889	1-phosphatidylinositol-4-phosphate 5-kinase [EC:2.7.1.68]	Fc gamma R-mediated phagocytosis
BaishaImmune60	K04536	guanine nucleotide-binding protein G(I)/G(S)/G(T) subunit beta-1	Chemokine signaling pathway
BaishaImmune61	K03014	DNA-directed RNA polymerases I, II, and III subunit RPABC2	Cytosolic DNA-sensing pathway
BaishaImmune62	K01116	phosphatidylinositol phospholipase C gamma-1 [EC:3.1.4.11]	Chemokine signaling pathway	Leukocyte transendothelial migration	Fc gamma R-mediated phagocytosis	Fc epsilon RI signaling pathway	Th17 cell differentiation	Th1 and Th2 cell differentiation	T cell receptor signaling pathway	Natural killer cell mediated cytotoxicity	Neutrophil extracellular trap formation
BaishaImmune63	K03013	DNA-directed RNA polymerases I, II, and III subunit RPABC1	Cytosolic DNA-sensing pathway
BaishaImmune64	K04364	growth factor receptor-bound protein 2	Chemokine signaling pathway	Fc epsilon RI signaling pathway	B cell receptor signaling pathway	T cell receptor signaling pathway	Natural killer cell mediated cytotoxicity
BaishaImmune65	K04438	C-crk adapter molecule crk	Chemokine signaling pathway	Fc gamma R-mediated phagocytosis
BaishaImmune66	K04438	C-crk adapter molecule crk	Chemokine signaling pathway	Fc gamma R-mediated phagocytosis
BaishaImmune67	K12655	OTU domain-containing protein 5 [EC:3.4.19.12]	RIG-I-like receptor signaling pathway
BaishaImmune68	K04547	guanine nucleotide-binding protein G(I)/G(S)/G(O) subunit gamma-13	Chemokine signaling pathway
BaishaImmune69	K14721	DNA-directed RNA polymerase III subunit RPC5	Cytosolic DNA-sensing pathway
BaishaImmune70	K12795	suppressor of G2 allele of SKP1	NOD-like receptor signaling pathway
BaishaImmune71	K03027	DNA-directed RNA polymerases I and III subunit RPAC1	Cytosolic DNA-sensing pathway
BaishaImmune72	K08059	interferon gamma-inducible protein 30	Antigen processing and presentation
BaishaImmune73	K02183	calmodulin	C-type lectin receptor signaling pathway
BaishaImmune74	K15040	voltage-dependent anion channel protein 2	NOD-like receptor signaling pathway	Neutrophil extracellular trap formation
BaishaImmune75	K03099	son of sevenless	Chemokine signaling pathway	Fc epsilon RI signaling pathway	B cell receptor signaling pathway	T cell receptor signaling pathway	Natural killer cell mediated cytotoxicity
BaishaImmune76	K04730	interleukin-1 receptor-associated kinase 1 [EC:2.7.11.1]	Toll-like receptor signaling pathway	Toll and Imd signaling pathway
BaishaImmune77	K12076	disks large protein 1	T cell receptor signaling pathway
BaishaImmune78	K02580	nuclear factor NF-kappa-B p105 subunit	Chemokine signaling pathway	B cell receptor signaling pathway	IL-17 signaling pathway	Th17 cell differentiation	Th1 and Th2 cell differentiation	T cell receptor signaling pathway	C-type lectin receptor signaling pathway	Cytosolic DNA-sensing pathway	RIG-I-like receptor signaling pathway	NOD-like receptor signaling pathway	Toll-like receptor signaling pathway	Toll and Imd signaling pathway	Neutrophil extracellular trap formation
BaishaImmune79	K03009	DNA-directed RNA polymerases I, II, and III subunit RPABC4	Cytosolic DNA-sensing pathway
BaishaImmune80	K06698	proteasome activator subunit 3 (PA28 gamma)	Antigen processing and presentation
BaishaImmune81	K02105	catenin beta 1	Leukocyte transendothelial migration
BaishaImmune82	K02105	catenin beta 1	Leukocyte transendothelial migration
BaishaImmune83	K02183	calmodulin	C-type lectin receptor signaling pathway
BaishaImmune84	K07831	Ras-related protein M-Ras	C-type lectin receptor signaling pathway
BaishaImmune85	K04237	partitioning defective protein 3	Chemokine signaling pathway
BaishaImmune86	K10630	RanBP-type and C3HC4-type zinc finger-containing protein 1 EC:2.3.2.31	Toll-like receptor signaling pathway
BaishaImmune87	K06484	integrin alpha 5	Hematopoietic cell lineage
BaishaImmune88	K12890	splicing factor arginine/serine-rich 1	IL-17 signaling pathway
BaishaImmune89	K06508	CD81 antigen	B cell receptor signaling pathway
BaishaImmune90	K05700	vinculin	Leukocyte transendothelial migration
BaishaImmune91	K04008	CD59 antigen	Complement and coagulation cascades	Hematopoietic cell lineage
BaishaImmune92	K08291	G protein-coupled receptor kinase [[[EC:2.7.11.1]6]]	Chemokine signaling pathway
BaishaImmune93	K04403	TAK1-binding protein 1	NOD-like receptor signaling pathway	Toll-like receptor signaling pathway
BaishaImmune94	K13708	dedicator of cytokinesis protein 1	Fc gamma R-mediated phagocytosis
BaishaImmune95	K03283	heat shock 70kDa protein 1/2/6/8	Antigen processing and presentation
BaishaImmune96	K05691	catenin alpha	Leukocyte transendothelial migration
BaishaImmune97	K02183	calmodulin	C-type lectin receptor signaling pathway
BaishaImmune98	K04501	mothers against decapentaplegic homolog 4	Th17 cell differentiation
BaishaImmune99	K11224	signal transducer and activator of transcription 5B	Chemokine signaling pathway	Th17 cell differentiation	Th1 and Th2 cell differentiation
BaishaImmune100	K04430	mitogen-activated protein kinase kinase 4 [EC:2.7.12.2]	Fc epsilon RI signaling pathway	Toll-like receptor signaling pathway
BaishaImmune101	K00863	triose/dihydroxyacetone kinase / FAD-AMP lyase (cyclizing) [[EC:2.7.1.28 2.7.1.29 4.6.1.15]]	RIG-I-like receptor signaling pathway
BaishaImmune102	K09565	peptidyl-prolyl isomerase F (cyclophilin D) [[EC:5.2.1.8]]	Neutrophil extracellular trap formation
BaishaImmune103	K07293	tyrosine-protein phosphatase non-receptor type 11 [[EC:3.1.3.48]]	Leukocyte transendothelial migration	Natural killer cell mediated cytotoxicity	C-type lectin receptor signaling pathway
BaishaImmune104	K07364	tyrosine-protein kinase Tec [EC:2.7.10.2]	T cell receptor signaling pathway
BaishaImmune105	K01365	cathepsin L EC:3.4.22.15	Antigen processing and presentation	RIG-I-like receptor signaling pathway
BaishaImmune106	K06061	mastermind	Th1 and Th2 cell differentiation
BaishaImmune107	K04409	p21-activated kinase 1 [EC:2.7.11.1]	Chemokine signaling pathway	Fc gamma R-mediated phagocytosis	T cell receptor signaling pathway	Natural killer cell mediated cytotoxicity	C-type lectin receptor signaling pathway
BaishaImmune108	K04674	TGF-beta receptor type-1 [EC:2.7.11.30]	IL-17 signaling pathway	Th17 cell differentiation
BaishaImmune109	K04398	caspase 8 [EC:3.4.22.61]	IL-17 signaling pathway	C-type lectin receptor signaling pathway	RIG-I-like receptor signaling pathway	Toll-like receptor signaling pathway	Toll and Imd signaling pathway
BaishaImmune110	K09035	transcription factor Maf	Th1 and Th2 cell differentiation
BaishaImmune111	K04392	Ras-related C3 botulinum toxin substrate 1	Chemokine signaling pathway	Intestinal immune network for IgA production	Leukocyte transendothelial migration	Fc gamma R-mediated phagocytosis	Fc epsilon RI signaling pathway	B cell receptor signaling pathway	Natural killer cell mediated cytotoxicity	Toll-like receptor signaling pathway	Neutrophil extracellular trap formation
BaishaImmune112	K09578	peptidyl-prolyl cis-trans isomerase NIMA-interacting 1 [[EC:5.2.1.8]]	RIG-I-like receptor signaling pathway
BaishaImmune113	K03023	DNA-directed RNA polymerase III subunit RPC3	Cytosolic DNA-sensing pathway
BaishaImmune114	K05765	cofilin	Fc gamma R-mediated phagocytosis
BaishaImmune115	K07369	mucosa-associated lymphoid tissue lymphoma translocation protein 1 EC:3.4.22.-	B cell receptor signaling pathway	T cell receptor signaling pathway	C-type lectin receptor signaling pathway
BaishaImmune116	K07827	GTPase Kras	Chemokine signaling pathway	Fc epsilon RI signaling pathway	B cell receptor signaling pathway	IL-17 signaling pathway	T cell receptor signaling pathway	Natural killer cell mediated cytotoxicity	C-type lectin receptor signaling pathway
BaishaImmune117	K07209	inhibitor of nuclear factor kappa-B kinase subunit beta [EC:2.7.11.1]0	Chemokine signaling pathway	B cell receptor signaling pathway	Th17 cell differentiation	Th1 and Th2 cell differentiation	T cell receptor signaling pathway	C-type lectin receptor signaling pathway	Cytosolic DNA-sensing pathway	RIG-I-like receptor signaling pathway	NOD-like receptor signaling pathway	Toll-like receptor signaling pathway	Toll and Imd signaling pathway
BaishaImmune118	K05858	phosphatidylinositol phospholipase C beta [EC:3.1.4.11]	Chemokine signaling pathway	NOD-like receptor signaling pathway	Neutrophil extracellular trap formation	Platelet activation
BaishaImmune119	K04345	protein kinase A [EC:2.7.11.1]1	Platelet activation
BaishaImmune120	K07532	Rho guanine nucleotide exchange factor 12	C-type lectin receptor signaling pathway
BaishaImmune121	K04718	sphingosine kinase [EC:2.7.1.91]	Fc gamma R-mediated phagocytosis
BaishaImmune122	K01115	phospholipase D1/2 [EC:3.1.4.4]	Fc gamma R-mediated phagocytosis
BaishaImmune123	K08064	nuclear transcription factor Y alpha	Antigen processing and presentation
BaishaImmune124	K06279	SHC-transforming protein 1	Chemokine signaling pathway	Natural killer cell mediated cytotoxicity
BaishaImmune125	K08043	adenylate cyclase 3 [EC:4.6.1.1]	Chemokine signaling pathway	Platelet activation
BaishaImmune126	K08601	ubiquitin carboxyl-terminal hydrolase CYLD [EC:3.4.19.12]	C-type lectin receptor signaling pathway	RIG-I-like receptor signaling pathway
BaishaImmune127	K06051	delta	Th1 and Th2 cell differentiation
BaishaImmune128	K05719	integrin beta 1	Intestinal immune network for IgA production	Leukocyte transendothelial migration	Platelet activation
BaishaImmune129	K05755	actin related protein 2/3 complex subunit 4	Fc gamma R-mediated phagocytosis
BaishaImmune130	K07203	serine/threonine-protein kinase mTOR [EC:2.7.11.1]	Th17 cell differentiation	Toll and Imd signaling pathway
BaishaImmune131	K06268	serine/threonine-protein phosphatase 2B regulatory subunit	B cell receptor signaling pathway	Th17 cell differentiation	Th1 and Th2 cell differentiation	T cell receptor signaling pathway	Natural killer cell mediated cytotoxicity	C-type lectin receptor signaling pathway
BaishaImmune132	K07941	ADP-ribosylation factor 6	Fc gamma R-mediated phagocytosis
BaishaImmune133	K20915	tumor suppressor p53-binding protein 1	Toll-like receptor signaling pathway
BaishaImmune134	K04456	RAC serine/threonine-protein kinase [EC:2.7.11.1]	Chemokine signaling pathway	Fc gamma R-mediated phagocytosis	Fc epsilon RI signaling pathway	B cell receptor signaling pathway	T cell receptor signaling pathway	C-type lectin receptor signaling pathway	Neutrophil extracellular trap formation	Platelet activation
BaishaImmune135	K05699	actinin alpha 1/4	Intestinal immune network for IgA production	Leukocyte transendothelial migration
BaishaImmune136	K02677	classical protein kinase C alpha type [EC:2.7.11.1]3	Intestinal immune network for IgA production	Leukocyte transendothelial migration	Fc gamma R-mediated phagocytosis	Fc epsilon RI signaling pathway	Natural killer cell mediated cytotoxicity	Neutrophil extracellular trap formation
BaishaImmune137	K11406	histone deacetylase 4/5 [EC:3.5.1.98]	Neutrophil extracellular trap formation
BaishaImmune138	K00922	phosphatidylinositol-45-bisphosphate 3-kinase catalytic subunit alpha/beta/delta [EC:2.7.1.153]	Chemokine signaling pathway	Intestinal immune network for IgA production	Leukocyte transendothelial migration	Fc gamma R-mediated phagocytosis	Fc epsilon RI signaling pathway	B cell receptor signaling pathway	T cell receptor signaling pathway	Natural killer cell mediated cytotoxicity	C-type lectin receptor signaling pathway	Toll-like receptor signaling pathway	Neutrophil extracellular trap formation	Platelet activation
BaishaImmune139	K01080	phosphatidate phosphatase EC:3.1.3.4	Fc gamma R-mediated phagocytosis
BaishaImmune140	K12757	myosin regulatory light chain 12	Intestinal immune network for IgA production	Leukocyte transendothelial migration	Platelet activation
BaishaImmune141	K23691	serine/threonine-protein kinase N2 [EC:2.7.11.1]3	NOD-like receptor signaling pathway
BaishaImmune142	K03352	anaphase-promoting complex subunit 5	B cell receptor signaling pathway	IL-17 signaling pathway
BaishaImmune143	K08049	adenylate cyclase 9 [EC:4.6.1.1]	Chemokine signaling pathway	Platelet activation
BaishaImmune144	K05719	integrin beta 1	Intestinal immune network for IgA production	Leukocyte transendothelial migration	Platelet activation
BaishaImmune145	K04634	guanine nucleotide-binding protein G(q) subunit alpha	Chemokine signaling pathway	Platelet activation
BaishaImmune146	K12562	amphiphysin	Fc gamma R-mediated phagocytosis
BaishaImmune147	K11140	aminopeptidase N [EC:3.4.11.2]	Hematopoietic cell lineage
BaishaImmune148	K09408	forkhead box protein O3	Chemokine signaling pathway
BaishaImmune149	K06630	14-3-3 protein epsilon	NOD-like receptor signaling pathway
BaishaImmune150	K04353	Ras-related protein Rap-1A	Chemokine signaling pathway	Leukocyte transendothelial migration	Platelet activation
BaishaImmune151	K05743	LIM domain kinase 1 [EC:2.7.11.1]	Fc gamma R-mediated phagocytosis
BaishaImmune152	K08059	interferon gamma-inducible protein 30	Antigen processing and presentation
BaishaImmune153	K05757	actin related protein 2/3 complex subunit 1A/1B	Fc gamma R-mediated phagocytosis
BaishaImmune154	K03022	DNA-directed RNA polymerase III subunit RPC8	Cytosolic DNA-sensing pathway
BaishaImmune155	K08065	nuclear transcription Y subunit beta	Antigen processing and presentation
BaishaImmune156	K11254	histone H4	Neutrophil extracellular trap formation
BaishaImmune157	K11252	histone H2B	Neutrophil extracellular trap formation
BaishaImmune158	K05692	actin beta/gamma 1	Intestinal immune network for IgA production	Leukocyte transendothelial migration	Neutrophil extracellular trap formation	Platelet activation
BaishaImmune159	K05863	solute carrier family 25 (mitochondrial adenine nucleotide translocator),member 4/5/6/31	Neutrophil extracellular trap formation
BaishaImmune160	K11140	aminopeptidase N [EC:3.4.11.2]	Hematopoietic cell lineage
BaishaImmune161	K11140	aminopeptidase N [EC:3.4.11.2]	Hematopoietic cell lineage
BaishaImmune162	K11140	aminopeptidase N [EC:3.4.11.2]	Hematopoietic cell lineage
BaishaImmune163	K04447	Janus kinase 2 [EC:2.7.10.2]	Chemokine signaling pathway	Th17 cell differentiation	Th1 and Th2 cell differentiation
BaishaImmune164	K05760	paxillin	Chemokine signaling pathway	Leukocyte transendothelial migration
BaishaImmune165	K10802	high mobility group protein B1	Neutrophil extracellular trap formation
BaishaImmune166	K06508	CD81 antigen	B cell receptor signaling pathway
BaishaImmune167	K03018	DNA-directed RNA polymerase III subunit RPC1 EC:2.7.7.6	Cytosolic DNA-sensing pathway
BaishaImmune168	K04393	cell division control protein 42	Chemokine signaling pathway	Leukocyte transendothelial migration	Fc gamma R-mediated phagocytosis	T cell receptor signaling pathway
BaishaImmune169	K06053	recombining binding protein suppressor of hairless	Th1 and Th2 cell differentiation
BaishaImmune170	K04427	mitogen-activated protein kinase kinase kinase 7 EC:2.7.11.25	IL-17 signaling pathway	T cell receptor signaling pathway	RIG-I-like receptor signaling pathway	NOD-like receptor signaling pathway	Toll-like receptor signaling pathway	Toll and Imd signaling pathway	Neutrophil extracellular trap formation
BaishaImmune171	K11303	histone acetyltransferase 1 [EC:2.3.1.48]	Neutrophil extracellular trap formation
BaishaImmune172	K03016	DNA-directed RNA polymerases I, II, and III subunit RPABC3	Cytosolic DNA-sensing pathway
BaishaImmune173	K18050	novel protein kinase C epsilon type [EC:2.7.11.1]3	Fc gamma R-mediated phagocytosis
BaishaImmune174	K06052	jagged-1	Th1 and Th2 cell differentiation
BaishaImmune175	K05863	solute carrier family 25 (mitochondrial adenine nucleotide translocator),member 4/5/6/31	Neutrophil extracellular trap formation
BaishaImmune176	K03025	DNA-directed RNA polymerase III subunit RPC6	Cytosolic DNA-sensing pathway
BaishaImmune177	K12366	engulfment and cell motility protein 1	Chemokine signaling pathway
BaishaImmune178	K04734	NF-kappa-B inhibitor alpha	Chemokine signaling pathway	B cell receptor signaling pathway	IL-17 signaling pathway	Th17 cell differentiation	Th1 and Th2 cell differentiation	T cell receptor signaling pathway	C-type lectin receptor signaling pathway	Cytosolic DNA-sensing pathway	RIG-I-like receptor signaling pathway	NOD-like receptor signaling pathway	Toll-like receptor signaling pathway	Toll and Imd signaling pathway
BaishaImmune179	K05858	phosphatidylinositol phospholipase C beta [EC:3.1.4.11]	Chemokine signaling pathway	NOD-like receptor signaling pathway	Neutrophil extracellular trap formation	Platelet activation
BaishaImmune180	K04734	NF-kappa-B inhibitor alpha	Chemokine signaling pathway	B cell receptor signaling pathway	IL-17 signaling pathway	Th17 cell differentiation	Th1 and Th2 cell differentiation	T cell receptor signaling pathway	C-type lectin receptor signaling pathway	Cytosolic DNA-sensing pathway	RIG-I-like receptor signaling pathway	NOD-like receptor signaling pathway	Toll-like receptor signaling pathway	Toll and Imd signaling pathway
BaishaImmune181	K19603	mitogen-activated protein kinase 15 [EC:2.7.11.24]	B cell receptor signaling pathway
BaishaImmune182	K05725	focal adhesion kinase 1 [EC:2.7.10.2]	Chemokine signaling pathway	Leukocyte transendothelial migration
BaishaImmune183	K04392	Ras-related C3 botulinum toxin substrate 1	Chemokine signaling pathway	Intestinal immune network for IgA production	Leukocyte transendothelial migration	Fc gamma R-mediated phagocytosis	Fc epsilon RI signaling pathway	B cell receptor signaling pathway	Natural killer cell mediated cytotoxicity	Toll-like receptor signaling pathway	Neutrophil extracellular trap formation
BaishaImmune184	K04432	mitogen-activated protein kinase kinase 3 [EC:2.7.12.2]	Fc epsilon RI signaling pathway	Toll-like receptor signaling pathway	Toll and Imd signaling pathway
BaishaImmune185	K04348	serine/threonine-protein phosphatase 2B catalytic subunit [EC:3.1.3.16]	B cell receptor signaling pathway	Th17 cell differentiation	Th1 and Th2 cell differentiation	T cell receptor signaling pathway	Natural killer cell mediated cytotoxicity	C-type lectin receptor signaling pathway
BaishaImmune186	K04348	serine/threonine-protein phosphatase 2B catalytic subunit [EC:3.1.3.16]	B cell receptor signaling pathway	Th17 cell differentiation	Th1 and Th2 cell differentiation	T cell receptor signaling pathway	Natural killer cell mediated cytotoxicity	C-type lectin receptor signaling pathway
BaishaImmune187	K04348	serine/threonine-protein phosphatase 2B catalytic subunit [EC:3.1.3.16]	B cell receptor signaling pathway	Th17 cell differentiation	Th1 and Th2 cell differentiation	T cell receptor signaling pathway	Natural killer cell mediated cytotoxicity	C-type lectin receptor signaling pathway
BaishaImmune188	K06083	WAS protein family,member 3	Fc gamma R-mediated phagocytosis
BaishaImmune189	K04440	mitogen-activated protein kinase 8/9/10 (c-Jun N-terminal kinase) [EC:2.7.11.24]	Fc epsilon RI signaling pathway	IL-17 signaling pathway	Th17 cell differentiation	Th1 and Th2 cell differentiation	T cell receptor signaling pathway	C-type lectin receptor signaling pathway	RIG-I-like receptor signaling pathway	NOD-like receptor signaling pathway	Toll-like receptor signaling pathway	Toll and Imd signaling pathway
BaishaImmune190	K04440	mitogen-activated protein kinase 8/9/10 (c-Jun N-terminal kinase) [EC:2.7.11.24]	Fc epsilon RI signaling pathway	IL-17 signaling pathway	Th17 cell differentiation	Th1 and Th2 cell differentiation	T cell receptor signaling pathway	C-type lectin receptor signaling pathway	RIG-I-like receptor signaling pathway	NOD-like receptor signaling pathway	Toll-like receptor signaling pathway	Toll and Imd signaling pathway
BaishaImmune191	K04440	mitogen-activated protein kinase 8/9/10 (c-Jun N-terminal kinase) [EC:2.7.11.24]	Fc epsilon RI signaling pathway	IL-17 signaling pathway	Th17 cell differentiation	Th1 and Th2 cell differentiation	T cell receptor signaling pathway	C-type lectin receptor signaling pathway	RIG-I-like receptor signaling pathway	NOD-like receptor signaling pathway	Toll-like receptor signaling pathway	Toll and Imd signaling pathway
BaishaImmune192	K05730	guanine nucleotide exchange factor VAV	Chemokine signaling pathway	Leukocyte transendothelial migration	Fc gamma R-mediated phagocytosis	Fc epsilon RI signaling pathway	B cell receptor signaling pathway	T cell receptor signaling pathway	Natural killer cell mediated cytotoxicity
BaishaImmune193	K04431	mitogen-activated protein kinase kinase 7 [EC:2.7.12.2]	Fc epsilon RI signaling pathway	T cell receptor signaling pathway	Toll-like receptor signaling pathway	Toll and Imd signaling pathway
BaishaImmune194	K08339	autophagy-related protein 5	RIG-I-like receptor signaling pathway	NOD-like receptor signaling pathway
BaishaImmune195	K04365	B-Raf proto-oncogene serine/threonine-protein kinase [EC:2.7.11.1]	Chemokine signaling pathway	Natural killer cell mediated cytotoxicity
BaishaImmune196	K09490	endoplasmic reticulum chaperone BiP [EC:3.6.4.10]	Antigen processing and presentation
BaishaImmune197	K05702	afadin	Leukocyte transendothelial migration
BaishaImmune198	K04439	beta-arrestin	Chemokine signaling pathway
BaishaImmune199	K09848	TNF receptor-associated factor 4	IL-17 signaling pathway
BaishaImmune200	K11864	BRCA1/BRCA2-containing complex subunit 3 EC:3.4.19.-	NOD-like receptor signaling pathway
BaishaImmune201	K05754	actin related protein 2/3 complex subunit 5	Fc gamma R-mediated phagocytosis
BaishaImmune202	K04371	mitogen-activated protein kinase 1/3 [EC:2.7.11.24]	Chemokine signaling pathway	Fc gamma R-mediated phagocytosis	Fc epsilon RI signaling pathway	IL-17 signaling pathway	Th17 cell differentiation	Th1 and Th2 cell differentiation	T cell receptor signaling pathway	Natural killer cell mediated cytotoxicity	C-type lectin receptor signaling pathway	NOD-like receptor signaling pathway	Toll-like receptor signaling pathway	Neutrophil extracellular trap formation	Platelet activation
BaishaImmune203	K04371	mitogen-activated protein kinase 1/3 [EC:2.7.11.24]	Chemokine signaling pathway	Fc gamma R-mediated phagocytosis	Fc epsilon RI signaling pathway	IL-17 signaling pathway	Th17 cell differentiation	Th1 and Th2 cell differentiation	T cell receptor signaling pathway	Natural killer cell mediated cytotoxicity	C-type lectin receptor signaling pathway	NOD-like receptor signaling pathway	Toll-like receptor signaling pathway	Neutrophil extracellular trap formation	Platelet activation
BaishaImmune204	K04729	myeloid differentiation primary response protein MyD88	NOD-like receptor signaling pathway	Toll-like receptor signaling pathway	Toll and Imd signaling pathway
BaishaImmune205	K04441	p38 MAP kinase [EC:2.7.11.24]	Leukocyte transendothelial migration	Fc epsilon RI signaling pathway	IL-17 signaling pathway	Th17 cell differentiation	Th1 and Th2 cell differentiation	T cell receptor signaling pathway	C-type lectin receptor signaling pathway	RIG-I-like receptor signaling pathway	NOD-like receptor signaling pathway	Toll-like receptor signaling pathway	Toll and Imd signaling pathway	Neutrophil extracellular trap formation	Platelet activation
BaishaImmune206	K12654	transmembrane protein 173	Cytosolic DNA-sensing pathway	RIG-I-like receptor signaling pathway	NOD-like receptor signaling pathway
BaishaImmune207	K00910	beta-adrenergic-receptor kinase [[[EC:2.7.11.1]5]]	Chemokine signaling pathway
BaishaImmune208	K03019	DNA-directed RNA polymerase III subunit RPC11	Cytosolic DNA-sensing pathway
BaishaImmune209	K08054	calnexin	Antigen processing and presentation
BaishaImmune210	K03020	DNA-directed RNA polymerases I and III subunit RPAC2	Cytosolic DNA-sensing pathway
BaishaImmune211	K08057	calreticulin	Antigen processing and presentation
BaishaImmune212	K09093	aryl hydrocarbon receptor	Th17 cell differentiation
BaishaImmune213	K08045	adenylate cyclase 5 [EC:4.6.1.1]	Chemokine signaling pathway	Platelet activation
BaishaImmune214	K09487	heat shock protein 90kDa beta	IL-17 signaling pathway
BaishaImmune215	K08337	ubiquitin-like modifier-activating enzyme ATG7	Neutrophil extracellular trap formation
BaishaImmune216	K05756	actin related protein 2/3 complex subunit 3	Fc gamma R-mediated phagocytosis
BaishaImmune217	K06030	mitofusin 2 [EC:3.6.5.-]	NOD-like receptor signaling pathway
BaishaImmune218	K07830	Ras-related protein R-Ras2	C-type lectin receptor signaling pathway
BaishaImmune219	K05410	TANK-binding kinase 1 [EC:2.7.11.1]0	IL-17 signaling pathway	Cytosolic DNA-sensing pathway	RIG-I-like receptor signaling pathway	NOD-like receptor signaling pathway	Toll-like receptor signaling pathway
BaishaImmune220	K11404	histone deacetylase 3 [EC:3.5.1.98]	Neutrophil extracellular trap formation
